# Supplementary material for: Quantitative provenance analysis through deep learning of rare earth element geochemistry: A case from the Liuling Group of the East Qinling Orogen, Central China
Source: Frontiers journal article supplement (doi:10.3389/feart.2022.1001528), 2022-09-16
Supplement: Data_Sheet_1.XLSX [file Data_Sheet_1.XLSX]

## Sheet: S1
Group	sample number	lithotype	La	Ce	Pr	Nd	Sm	Eu	Gd	Tb	Dy	Ho	Er	Tm	Yb	Lu	Reference
Taihua Group	TH13-01	amphibolite	13.9	36.3	5.65	25.9	5.72	1.75	5.26	0.82	4.66	0.9	2.3	0.31	1.95	0.29	Wang, X., Huang, X., Yang, F., 2019. Revisiting the Lushan-Taihua Complex: New perspectives on the Late Mesoarchean-Early Neoarchean crustal evolution of the southern North China Craton. Precambrian Research 325, 132-149.
	TH13-17		11.8	26.7	3.62	16	4.07	1.38	4.47	0.82	5.28	1.15	3.2	0.47	3.08	0.47
	TH13-18		14.8	37.3	5.65	24.4	4.73	1.38	4.13	0.64	3.78	0.78	2.08	0.29	1.79	0.27
	TH13-38		12.1	29.6	4.46	19.6	4.43	1.2	4.39	0.73	4.48	0.96	2.6	0.37	2.37	0.36
	TH13-39		10	22.4	3.18	14.7	3.92	1.23	4.47	0.84	5.39	1.19	3.33	0.48	3.1	0.48
	TH05-14		9.17	21.1	3.06	13.6	3.86	1.23	4.7	0.87	5.46	1.19	3.35	0.52	3.44	0.5
	TH05-17		8.33	19.5	2.85	12.9	3.48	1.09	4.21	0.78	4.6	1.02	2.87	0.43	2.85	0.43
	TH13-16		2.39	7.09	1.23	6.78	2.3	0.87	2.88	0.58	3.89	0.86	2.41	0.36	2.3	0.36
	TH13-30		4.13	9.96	1.52	7.58	2.25	0.83	2.66	0.51	3.32	0.73	2.04	0.3	1.92	0.3
	TH05-4		2.98	8.41	1.34	6.44	2.09	0.76	2.72	0.55	3.43	0.74	2.08	0.31	2.07	0.31
	TH05-5		4.61	10.2	1.78	7.93	2.47	0.88	3.11	0.6	3.76	0.78	2.11	0.33	2.05	0.31
	TH05-19		2.98	7.68	1.27	6.5	2.26	0.83	2.8	0.59	3.62	0.82	2.29	0.36	2.42	0.35
	TH13-05B	TTG	26.7	49.2	5.2	17.3	2.02	0.8	1.52	0.13	0.58	0.1	0.23	0.03	0.17	0.03
	TH13-07		33.1	61.3	6.11	20.3	2.44	0.92	1.95	0.19	0.96	0.18	0.46	0.06	0.4	0.06
	TH13-10		39.6	72.7	7.3	24.2	2.86	1.19	2.2	0.21	0.98	0.18	0.44	0.06	0.36	0.06
	TH13-11		34.2	63.4	6.39	21.4	2.42	0.92	1.79	0.15	0.66	0.11	0.28	0.04	0.24	0.04
	TH13-15		82.7	150	14.9	48.1	5.36	1.41	4.19	0.32	1.41	0.28	0.8	0.13	0.93	0.17
	TH05-2		24.2	63.9	10.3	42.2	7.16	1.78	4.76	0.56	2.59	0.46	1.21	0.16	1.03	0.16
	TH05-15		27.3	56.1	7.13	27	4.37	1.16	2.99	0.35	1.64	0.29	0.77	0.12	0.75	0.1
	TH08-1		47	110	14.3	56.8	8.45	2.44	5.8	0.61	2.55	0.41	1	0.13	0.86	0.13
	TH08-13		30.7	69.2	8.73	34.9	5.29	1.36	3.58	0.42	1.95	0.35	0.92	0.13	0.82	0.13
	TH08-16		20.5	44.6	5.49	21.7	4.34	0.79	3.79	0.57	3.03	0.56	1.44	0.2	1.26	0.19
	TH08-24		69.4	139	14.2	48.3	5.95	1.37	4.74	0.5	2.53	0.5	1.37	0.21	1.34	0.22
	TH13-29		5.15	9.42	1.02	3.37	0.44	0.61	0.39	0.05	0.31	0.07	0.25	0.05	0.36	0.08
	TH13-40		9.46	17.3	1.92	6.9	1.22	0.49	0.92	0.09	0.36	0.06	0.12	0.02	0.09	0.02
	TH05-9		10.3	15.3	1.57	5.22	0.6	1.08	0.5	0.03	0.14	0.03	0.08	0.01	0.09	0.02
	TH05-16		3.51	6.68	0.71	2.46	0.42	0.59	0.47	0.04	0.16	0.03	0.08	0.01	0.09	0.02
	TH05-18		9.61	16.8	1.95	6.77	1.19	0.57	0.87	0.08	0.32	0.05	0.1	0.01	0.08	0.01
	THL05-21		7.03	15.1	1.91	6.76	1.02	0.6	0.78	0.09	0.5	0.09	0.27	0.04	0.28	0.05
	TH08-10		3.38	8.08	1.1	4.54	0.87	0.47	0.82	0.13	0.73	0.16	0.43	0.07	0.44	0.07
	TH08-15		7.28	11.8	1.51	5.44	0.98	0.49	0.8	0.09	0.35	0.05	0.12	0.02	0.1	0.02
	TH08-17		8.18	15.3	1.65	6.15	1.13	0.49	0.92	0.11	0.47	0.07	0.17	0.02	0.13	0.02
	THXS14171	Biotite monzonite gneiss	36.4	69.3	7.25	24.4	3.98	0.58	3.31	0.44	2.38	0.46	1.24	0.18	1.16	0.18	Luo, Z.X., Huang, X.L., Wang, X., 2018. Geochronology and Geochemistry of the TTG Gneisses from the Taihua Group in the Xiaoshan Area, North China Craton: Constraints on Petrogenesis. Geotectonica et Metalloenia 42, 332-347.
	THXS14172		51.3	94.8	9.65	31.4	4.51	0.7	3.52	0.4	1.97	0.36	0.96	0.14	0.87	0.13
	THXS14173		36.8	65.6	6.51	21	3.02	0.63	2.38	0.27	1.34	0.25	0.7	0.11	0.7	0.11
	THXS14174		43.4	80.6	8.21	26.7	3.74	0.66	2.85	0.3	1.45	0.26	0.7	0.1	0.65	0.1
	THXS14175		43.3	77.5	7.8	25.3	3.7	0.64	2.85	0.33	1.59	0.3	0.79	0.11	0.75	0.11
	THXS14178	Biotite plagioclase gneiss	38.8	78.1	9.1	33.9	5.5	1.32	3.87	0.42	1.9	0.32	0.78	0.1	0.62	0.09
	THXS14181		17.7	34.7	4.05	15.1	2.51	0.6	1.94	0.22	1.12	0.21	0.57	0.08	0.54	0.08
	ZAZ-1-1	metapelite	26.9	55	6.73	25.9	5.25	1.77	5.34	0.9	5.71	1.21	3.29	0.47	2.99	0.45	Lan, C., Zhou, Y., Wang, C., Zhao, T., 2017. Depositional age and protoliths of the Paleoproterozoic upper Taihua Group in the Wuyang area in the southern margin of the North China Craton: New insights into stratigraphic subdivision and tectonic setting. Precambrian Research 297, 77-100.
	ZAZ-1-2		28.3	55.9	6.74	26.1	5.24	1.5	6.08	1.06	6.87	1.57	4.48	0.65	4.3	0.66
	ZAZ-1-3		20.3	44.1	5.5	19.6	3.46	0.9	3.14	0.48	3	0.63	1.7	0.26	1.67	0.27
	TSM-1-1		21.5	44.8	5.4	20.2	3.58	1.16	3.31	0.49	2.87	0.55	1.34	0.17	0.98	0.15
	TSM-1-2		24.3	50.7	6.14	22.8	3.98	1.08	3.71	0.54	3.13	0.66	1.85	0.28	1.86	0.29
	TSM-1-3		25.7	53.4	6.4	23.8	4.11	1.28	3.69	0.5	2.69	0.49	1.15	0.14	0.84	0.13
	TSM-1-4		19.7	42.2	5.33	18.3	3.71	1.05	3.47	0.55	3.24	0.69	1.96	0.32	2.11	0.34
	ZAZ-2-1	meta-arenite	42.2	88.1	10.1	39.2	7.92	1.43	7.75	1.25	7.4	1.54	4.12	0.59	3.78	0.58
	ZAZ-2-2		34.6	75.4	9.11	35.5	7.54	1.46	7.47	1.24	7.81	1.68	4.74	0.71	4.68	0.74
	ZAZ-2-3		54.5	112	13.7	53.4	12.7	3.04	13.2	2.23	13.4	2.68	7.02	1	6.27	0.93
	ZAZ-2-4		56	106	12.5	49.6	11.4	3.3	11.4	1.82	10.8	2.25	5.96	0.83	5.18	0.79
	ZAZ-2-5		71.6	148	17.5	65.8	11.1	2.05	9.79	1.35	7.49	1.45	3.61	0.49	3.17	0.5
	ZAZ-4-1		28.4	55.4	6.5	24.6	4.85	1.07	4.49	0.68	4.04	0.85	2.26	0.33	2.07	0.32
	ZAZ-4-2		22.8	54.1	7.26	27.1	5.08	1.12	4.43	0.64	3.78	0.76	2.07	0.3	1.99	0.32
	ZAZ-4-3		39.6	72.7	8.12	29.3	5.33	1.38	4.81	0.72	4.16	0.86	2.28	0.33	2.05	0.3
	ZAZ-4-4		28.3	55.7	6.56	24.1	4.84	1.19	4.46	0.7	4.23	0.88	2.35	0.34	2.21	0.32
	YSW-2-1	carbonaceous meta-arenite	25.7	46.9	5.36	18.9	3.3	0.68	2.85	0.4	2.42	0.51	1.43	0.22	1.38	0.21
	YSW-2-2		24.6	51.1	6.24	23.1	4.28	0.84	3.96	0.59	3.49	0.75	2.06	0.3	2	0.31
	YSW-2-3		25.5	48.6	5.86	21.5	3.65	0.62	2.92	0.41	2.31	0.46	1.26	0.19	1.26	0.18
	YSW-2-4		18.5	37.5	4.49	17.4	3.67	0.83	3.72	0.57	3.37	0.69	1.85	0.27	1.74	0.27
	YSW-2-5		20.1	38.2	4.5	16	2.77	0.82	2.36	0.33	1.89	0.37	0.97	0.14	0.9	0.13
	YSW-2-6		30.4	61.3	7.74	29.5	5.46	0.93	4.09	0.49	2.51	0.5	1.37	0.21	1.42	0.22
	YSW-2-7		22.1	41.1	4.88	17.8	3.15	0.57	2.89	0.45	2.88	0.64	1.87	0.29	1.84	0.28
	ZAZ-3-1	meta-mafic rokcs	6.77	14.8	2.04	9.11	2.52	0.88	2.93	0.54	3.42	0.73	2	0.29	1.85	0.29
	ZAZ-3-2		7.19	15.5	2.14	9.32	2.52	0.9	2.86	0.5	3.24	0.69	1.87	0.27	1.72	0.26
	ZAZ-3-3		7.68	16.7	2.14	9.3	2.56	0.88	3.03	0.56	3.53	0.78	2.13	0.3	1.99	0.3
	TSM-3-1		2.6	6.94	1.13	5.89	1.97	0.76	2.67	0.54	3.79	0.89	2.64	0.4	2.72	0.44
	TSM-3-2		3.45	8.49	1.32	6.56	2.06	0.76	2.55	0.49	3.18	0.72	2.02	0.3	2.02	0.32
	TSM-3-3		2.81	6.98	1.08	5.44	1.9	0.7	2.49	0.48	3.01	0.65	1.78	0.25	1.63	0.24
	TSM-3-4		3.55	8.49	1.28	5.75	1.71	0.72	2.12	0.44	3.08	0.72	2.15	0.34	2.24	0.35
	TSM-3-5		3.75	9.41	1.37	6.83	2.15	0.81	2.73	0.51	3.29	0.72	1.98	0.28	1.82	0.28
	HN1204	Biotite magnetite plagioclase gneiss	314	637	64.4	237	36.4	5.12	22.4	2.35	11.8	2.1	5.62	0.66	3.62	0.53	Huang, D.M., Wan, Y.S., Zhang, D.H., 2016. Paleoproterozoic tectonothermal events in Xiatang area, southern margin of North China Craton: geochemical characteristics, zircon SHRIMP U-Pb dating and Hf isotope studies. Geological Review 62, 1439-1461.
	HN1212	Gneissic plagioclase epidote amphibolite	44.2	74.4	9.09	36.4	7.33	2.63	8.63	1.32	9.01	1.96	5.26	0.72	4.05	0.61
	XT01	Gneissic granite	42.5	76.2	8.13	26.4	4.07	0.9	2.95	0.37	1.96	0.36	0.99	0.13	0.74	0.13
	XT02	Metagabbro diorite	66.7	150	19.7	77.3	15.8	2.13	13.4	2.07	11.6	2.3	6.24	0.77	4.67	0.67
	HN1201		62.1	132	14.4	54.6	10.5	1.85	8.89	1.16	6.48	1.2	3.11	0.38	2.19	0.35
	HN1209	Gneissic trondhjemite	54.9	103	10.5	34.6	5.52	0.84	4.48	0.61	3.38	0.68	1.95	0.27	1.69	0.29
	HN1210	Gneissic trondhjemite	128	237	22.3	70.7	10.1	1.2	7.14	0.88	4.9	0.91	2.58	0.39	2.52	0.41
	HN1202	Gneissic syenogranite	99.2	162	16.2	51	6.45	1.15	4.12	0.39	1.66	0.26	0.64	0.07	0.41	0.08
	HN1213		143	254	25.2	78.7	12.5	0.95	9.73	1.28	6.45	1.17	2.91	0.32	1.87	0.3
	HN1214		217	364	30.8	89.4	8.87	1.41	4.9	0.53	2.28	0.4	1.12	0.15	0.84	0.13
		Marble	12.74	25.58	3.28	12.76	2.56	0.51	2.4	0.41	2.25	0.46	1.31	0.2	1.14	0.17	Feng, J.Z., Zhang, D.T., Zhang, W.M., 2014. ＲEE Geochemical Characteristics of Xiaoqinling Gold Deposits and Their Geological Significance. Geoscience 28, 1151-1160.
		Quartzite	7.65	13.72	1.59	5.21	0.79	0.29	0.6	0.09	0.48	0.09	0.25	0.04	0.23	0.03
		Granulite	26.67	51.19	6.13	21.32	3.66	0.9	2.76	0.41	1.97	0.34	0.9	0.13	0.76	0.11
		Gneiss	38.11	74.65	9.12	32.33	5.89	1.45	4.93	0.81	4.2	0.79	2.2	0.34	1.94	0.28
		Amphibolite	18.09	37.12	5.22	21.38	5.04	1.61	5.51	1.05	6.19	1.27	3.78	0.64	3.97	0.61
		Gneissic granite	47.46	89.04	9.26	29.61	4.49	1.18	3.1	0.47	2.32	0.42	1.15	0.17	1	0.14
	QL0703-1	Biotite plagioclase gneiss	18.38	36.07	3.77	14.42	2.57	0.79	2.3	0.3	1.91	0.38	1.05	0.14	0.9	0.14	Shi, Y., Yu, J.H., Xu, X.S., 2011. U-Pb ages and Hf isotope compositions of zircons of TaihuaGroup in Xiaoqinling area, Shaanxi Province. Acta Petrologica Sinica 27, 3095-3108.
	Q1	amphibolite	10.3	24.08	3	12.4	2.87	1.03	3.21	0.46	3.5	0.8	2.41	0.37	2.34	0.36	Xu, X., Griffin, W.L., Ma, X., O Reilly, S.Y., He, Z., Zhang, C., 2009. The Taihua group on the southern margin of the North China craton: further insights from U–Pb ages and Hf isotope compositions of zircons. Mineralogy and Petrology 97, 43-59.
	QL0701-1	biotite gneiss	15.4	28.06	3	11.19	1.75	0.7	1.34	0.13	0.72	0.13	0.33	0.05	0.25	0.04
	W1	amphibolite	7.2	14	1.4	6.6	1.5	0.59	2	0.44	2.7	0.55	1.5	0.26	1.7	0.24
	W8		4.6	11	1.1	6.3	1.7	0.68	2.6	0.52	3.2	0.65	1.9	0.28	1.6	0.25
	W37	sodium-rich amphibolite	13	26	3.8	18	4.2	1.5	4.8	0.89	4.8	1	2.7	0.37	2.3	0.32
	W41		22	46	4.7	20	4	1.2	4.4	0.82	4.8	1	2.9	0.4	2.4	0.34
	LS0417-1	amphibolite	8.54	21.4	2.93	12.5	3.36	1.13	3.71	0.68	4.28	0.9	2.69	0.37	2.37	0.36	Liu, D., Wilde, S.A., Wan, Y., Wang, S., Valley, J.W., Kita, N., Dong, C., Xie, H., Yang, C., Zhang, Y., Gao, L., 2009. Combined U–Pb, hafnium and oxygen isotope analysis of zircons from meta-igneous rocks in the southern North China Craton reveal multiple events in the Late Mesoarchean–Early Neoarchean. Chemical Geology, 261, 140-154.
	LS0417-3		4.69	10.6	1.7	8.09	2.33	0.59	2.19	0.35	2.24	0.46	1.31	0.2	1.2	0.19
	LS0417-2	tonalite	30	55.6	6.18	21.6	3.57	1	2.14	0.3	1.48	0.26	0.67	0.08	0.45	0.07
	LS0417-4		27.3	67.5	9.09	37.9	6.57	1.86	4.22	0.49	2.3	0.39	1.1	0.13	0.79	0.12
	002/1	Amphibolite	10.01	23.69	3.28	14.7	3.82	1.38	4.9	0.88	5.52	1.23	3.37	0.55	3.45	0.5	Yang, C.X., 2008. Zircon SHRIMP U- Pb ages, geochemical characteristics and environmental evolution of the Early Precambrian metamorphic series in the Lushan area, Henan, China. Geological Bulletin of China 27, 517- 533
	003/1		4.96	14.45	2.04	8.89	2.54	1.05	3.46	0.58	3.85	0.8	2.41	0.38	2.45	0.36
	003/2		7.85	18.62	2.64	11.39	2.83	1.02	3.45	0.59	3.73	0.75	2.24	0.34	2.34	0.34
	003/4		6.88	18.87	2.68	11.11	3.02	1.15	3.99	0.73	4.44	0.95	2.9	0.5	3.16	0.47
	MC08-1	Tonalite	27.05	100.83	11.28	42.17	6.56	1.54	6.13	0.77	4.09	0.79	2.15	0.32	1.14	0.36	DiWu, C.R., 2005. Application of ICP-MS in geological sample testing: geochemistry and zircon geochronology of grey gneiss in Taihua Group, Xiaoqinling. Northwestern University.
	MC10		28.24	52.1	5.6	22.56	3.81	1.13	3.49	0.46	2.52	0.5	1.37	0.21	1.43	0.23
	MC11		25.88	50.03	5.3	20.36	3.37	0.84	3.09	0.4	2.26	0.46	1.31	0.21	1.39	0.23
	MC12		27.58	52.97	5.48	20.88	3.25	0.86	2.96	0.38	2.09	0.42	1.17	0.19	1.27	0.21
	MC15		55.89	107.01	11.34	43.61	7.32	1.58	6.97	0.93	5.13	1.01	2.71	0.4	1.69	0.42
	MC19		63.96	114.43	12.67	48.25	7.9	1.44	7.65	1.01	5.58	1.1	2.88	0.41	1.65	0.39
	MC22		26.35	53.16	5.85	23.65	4.24	0.91	3.81	0.54	3.09	0.64	1.81	0.29	1.98	0.33
	MC08-2	Granodiorite	27.57	59.48	7.15	30.23	6.2	1.18	5.81	0.93	5.65	1.2	3.34	0.54	1.59	0.56
	MC23		32.86	61.66	6.27	23.54	3.57	1.18	3.32	0.42	2.22	0.44	1.22	0.19	1.28	0.21
	MC01	Granite	22.12	49.67	4.93	19.64	4.1	0.5	3.83	0.58	3.5	0.75	2.07	0.33	2.11	0.34
	MC02		24.31	42.37	4.69	18.17	3.26	0.55	2.95	0.38	1.88	0.35	0.85	0.12	0.79	0.13
	39600	Dacite	114	214	24.2	89.5	13.7	3.08	11	1.96	11.2	2.15	6.51	0.909	6.19	0.95	Liu, X.Y., Cai, J.H., Yan, G.H., 2011. Petrogeochemistry and geochronology of subvolcanic rocks from Yanyaozhai Formation of Xionger Group in the southern margin of North China Craton and its significance. Acta Geologica Sinica 85, 1134-1145.
	08-6-2 ①	Trachyte	16.4	34.1	4.77	21.5	4.97	1.97	5.32	1.1	7.63	1.62	5.03	0.711	4.73	0.778
	08-6-2 ②	Trachyte dacite	104	202	22.3	77.2	11.8	1.99	8.82	1.42	7.69	1.34	4.34	0.642	4.34	0.69	Shi, Y., 2012. Formation and evolution of the East Qinling orogenic belt in Central China. Nanjing University.
	08-6-4 ①	Trachyte	32.5	47.4	7.52	33.5	7.25	2.06	6.24	1.33	7.48	1.71	5.75	0.859	6.56	0.958
	08-6-4 ②	Dacite	110	206	23	86.7	13.3	3.16	10.4	1.72	9.4	1.78	5.61	0.787	5.31	0.817
	08-6-4 ③	Rhyolite	91.3	170	18.7	74.5	11.2	2.83	9.49	1.65	9.47	1.86	6.32	0.805	6.07	0.856
	0703-2		62.75	105	10.32	34.91	5.18	0.68	4.21	0.43	2.28	0.45	1.14	0.16	0.93	0.15
	Sh7017-1	~2.8Ga Trondhjemite gneiss	11.95	21.99	2.12	7.23	1.04	0.74	0.83	0.09	0.48	0.09	0.25	0.03	0.23	0.03	Jia, X.L., 2016. Study on Taihua complex in Xiaoqinling and Lushan areas: implications for basement evolution in the southern margin of North China. Northwestern University.
	Sh7017-2		31.91	58.85	5.77	19.11	2.77	0.79	2.2	0.25	1.17	0.18	0.47	0.06	0.36	0.06
	Sh7017-3		23	40.89	4	13.88	1.83	0.62	1.38	0.14	0.68	0.11	0.33	0.04	0.27	0.04
	Sh7017-4		10.54	18.81	1.91	6.75	1.02	0.67	0.8	0.09	0.41	0.07	0.18	0.02	0.15	0.02
	Sh710-1	~2.8Ga Granodiorite	40.53	81.97	9.16	34.07	6.27	1.3	5.53	0.79	4.47	0.86	2.44	0.34	2.17	0.32
	Sh710-2		50.64	98.96	11.43	41.81	7.46	1.29	6.4	0.88	4.95	0.92	2.56	0.34	2.13	0.31
	Sh710-3		42.04	84.38	9.77	37.73	7.07	1.58	6.5	0.96	5.69	1.13	3.27	0.46	3.05	0.44
	Sh710-4		43.2	86.06	9.9	37.94	7.05	1.57	6.41	0.93	5.48	1.08	3.12	0.44	2.84	0.42
	Sh7108-1	~2.5Ga Trondhjemite	16.57	32.01	3.13	10.84	1.83	0.52	1.52	0.19	0.99	0.18	0.53	0.08	0.52	0.08
	Sh7108-2		46.44	76.63	7.42	23.56	2.76	0.74	2.01	0.19	0.81	0.13	0.34	0.04	0.26	0.04
	Sh7108-3		54.1	100.14	9.59	31.58	3.9	0.83	2.73	0.25	1.08	0.17	0.44	0.05	0.34	0.06
	Sh755-1	~2.5Ga Tonalite	21.94	40.15	4.14	14.66	2.13	0.7	1.62	0.18	0.84	0.14	0.36	0.04	0.25	0.04
	Sh755-2		18.69	35.65	3.69	12.8	2.04	0.7	1.64	0.2	0.97	0.17	0.46	0.06	0.36	0.05
	Sh755-3		24.74	45.8	4.68	16.24	2.34	0.87	1.81	0.21	1.08	0.2	0.55	0.08	0.5	0.08
	Sh751-1	~2.5Ga Granodiorite	63.95	124.65	14.06	51.77	8.43	1.78	6.38	0.77	3.96	0.7	1.95	0.27	1.71	0.24
	Sh751-2		62.11	118.45	12.88	47	6.73	1.61	4.97	0.55	2.74	0.48	1.32	0.18	1.15	0.16
	Sh751-3		67.06	126.39	13.62	48.23	7.12	1.68	5.17	0.58	2.85	0.47	1.33	0.18	1.12	0.16
	Sh52-1	~2.5Ga Amphibolite	5.02	8.9	0.91	3.12	0.46	0.32	0.39	0.04	0.22	0.04	0.11	0.01	0.09	0.02
	Sh52-2		4.18	6.69	0.62	2	0.26	0.33	0.23	0.02	0.12	0.02	0.06	0.01	0.06	0.01
	Sh52-3		6.98	8.84	0.68	2	0.23	0.61	0.23	0.02	0.11	0.02	0.07	0.01	0.1	0.02
	Sh53	~2.5Ga Biotite amphibolite	16.01	35.66	4.03	15.56	3.21	0.97	3.43	0.56	3.65	0.76	2.23	0.33	2.18	0.33
	Sh16-1	~2.3Ga Tonalite gneiss	54.38	104.96	11.05	37.92	5.51	1.08	4.13	0.52	2.8	0.51	1.51	0.22	1.44	0.22
	Sh16-2		25.88	51.21	5.54	19.8	3.24	0.88	2.64	0.34	1.83	0.34	0.94	0.14	0.89	0.13
	Sh16-3		99.29	183.96	19.25	65.44	8.93	1.88	6.85	0.8	4.15	0.73	2.03	0.26	1.65	0.24
	Sh12-1	~2.3Ga Granite gneiss	104.73	204.92	21.69	68.74	10.22	1.33	7.51	0.88	4.22	0.69	1.84	0.24	1.53	0.22
	Sh12-2		158.61	315.4	35	115.2	15.54	2.19	11.89	1.43	7.53	1.35	3.82	0.51	3.24	0.48
	Sh12-3		109.39	208.5	22.43	69.7	9.75	1.34	7.06	0.77	3.72	0.61	1.63	0.22	1.37	0.2
	Sh12-4		395.08	692.27	66.61	215.5	24.64	3.87	18.26	1.84	8.75	1.41	3.79	0.5	3.12	0.42
	Sh12-5		189.7	376.12	40.22	139.14	17.6	2.55	12.56	1.31	6.06	0.98	2.66	0.34	2.11	0.3
	Sh13-1	~2.3Ga Granite gneiss	64.79	122.25	12.37	42.67	5.53	1.23	4.3	0.49	2.54	0.46	1.31	0.18	1.14	0.18
	Sh13-2		43.89	67.81	6.37	19.94	2.53	0.77	1.96	0.21	1.04	0.18	0.54	0.08	0.5	0.08
	Sh13-3		93.74	164.41	15.09	47.12	5.48	1.09	3.77	0.32	1.32	0.19	0.52	0.06	0.4	0.06
	Sh14-1	~1.8Ga Granite	227.4	413.38	41.37	123.82	14.26	1.97	10.41	1.04	5.03	0.83	2.33	0.32	2.04	0.31
	Sh14-2		145.79	265.8	26.12	79.19	9.2	1.46	6.61	0.61	2.61	0.38	0.92	0.1	0.56	0.07
	Sh1119	~1.8Ga Granite	133.42	242.1	23.56	70.78	8.08	1.35	5.7	0.52	2.25	0.33	0.84	0.1	0.55	0.07
	Sh101-1	~1.8Ga Tonalite	50.88	100.86	11.34	42.75	7.73	1.52	6.81	0.95	5.38	1.03	2.95	0.42	2.7	0.39
	Sh102-1	~1.8Ga Plagioclase amphibolite	8.15	21.73	3.19	15.87	4.76	1.52	5.92	1.09	7.18	1.56	4.66	0.69	4.63	0.7
	Sh102-2		8.07	21.61	3.22	15.97	4.8	1.48	5.95	1.09	7.03	1.52	4.56	0.66	4.52	0.69
Xiong'er Group	FD-019	Jaspilite	23.79	48.53	6.02	23.74	4.47	1.42	4.11	0.63	3.48	0.7	1.98	0.3	1.86	0.3	Li, H.Z., Zhou, Y.Z., Zhang, L.C., 2012. Study on geochemistry and development mechanism of Proterozoic chert from Xiong’er Group in southern region of North China Craton. Acta Petrologica Sinica 28, 3679-3691.
	FD-022		25.48	56.41	7.13	27.89	5.2	1.56	4.55	0.71	4.02	0.8	2.22	0.35	2.25	0.34
	FD-028a		24.13	47.81	5.95	22.08	4	0.87	3.49	0.55	2.98	0.61	1.77	0.27	1.73	0.27
	FD-28b		22.65	44.99	5.5	21.12	3.75	0.88	3.29	0.5	2.85	0.59	1.63	0.28	1.72	0.26
	FD-033		28.43	55.67	6.963	25.43	4.73	1.11	4.12	0.65	3.53	0.75	2.07	0.31	1.99	0.31
	FD-036		23.74	45.16	5.46	20.82	3.82	0.95	3.34	0.53	3.05	0.65	1.74	0.26	1.61	0.24
	FD-039		22.89	44.06	5.31	20.13	3.66	0.84	3.18	0.49	2.79	0.57	1.63	0.24	1.6	0.25
	FD-042		29.51	52.77	6.2	23.11	4.17	0.97	3.61	0.58	3.31	0.7	1.97	0.29	1.89	0.28
	FD-006a	Argillaceous chert	52.91	99.05	11.52	43.41	7.93	1.88	7.12	1.08	6.31	1.28	3.65	0.59	3.64	0.6
	FD-006b		51.64	97.4	11.39	43.71	7.85	1.82	6.74	1.06	6.18	1.28	3.5	0.58	3.71	0.6
	FD-016		68.16	127.2	14.87	56.4	9.97	2.25	8.7	1.34	7.73	1.59	4.53	0.71	4.57	0.74
	FD-017		51.77	107.8	12.48	48.89	8.62	1.88	7.69	1.66	6.39	1.34	3.64	0.56	3.57	0.55
	HSP705B2	Basalt	48.3	96	12.1	50.4	9.55	2.42	9.15	1.58	9.22	1.75	5.47	0.87	5.27	0.76	Wang, C., He, X., Carranza, E.J.M., Cui, C., 2019. Paleoproterozoic volcanic rocks in the southern margin of the North China Craton, central China: Implications for the Columbia supercontinent. Geoscience Frontiers 10, 1543-1560.
	QMD13B5		47	96	12.2	50.1	9.49	2.26	9.13	1.57	9.02	1.79	5.38	0.83	5.16	0.75
	QMDB1a	Basaltic andesite	41.4	88	10.4	41.3	8.97	2.09	8.35	1.27	7.58	1.57	4.57	0.66	4.22	0.68
	QMDB1b		43.1	89	10.8	42.7	9.24	2.2	8.45	1.27	7.75	1.6	4.55	0.66	4.17	0.67
	QMDB1c		41.1	84	10.3	42.2	9.09	1.93	7.88	1.22	7.4	1.48	4.39	0.64	4.12	0.64
	QMDB2a		40.7	86	10.2	39.6	9.29	2.23	7.66	1.23	7.1	1.5	4.32	0.62	3.88	0.63
	QMDB2b		39.5	85	10.1	40.3	8.9	2.06	7.64	1.21	7.07	1.47	4.42	0.63	4	0.65
	QMDB3a		41.9	86	10.3	41.1	8.86	2.12	7.99	1.22	7.4	1.5	4.48	0.65	4.14	0.65
	QMDB3b		42.9	88	10.6	42.7	8.72	2.17	8.16	1.27	7.62	1.57	4.47	0.66	4.11	0.67
	QMDB4a		43.9	91	11.1	41.9	8.57	2.29	8.03	1.28	7.76	1.61	4.74	0.67	4.21	0.68
	QMDB4b		43.6	0	43.6	89.8	10.7	43.2	8.5	2.34	8.37	1.27	7.8	1.55	4.7	0.67
	HSP710B1	Dacite	86.1	161	19.3	73.5	12.6	2.41	11.5	2.06	11.6	2.26	7.03	1.15	7.02	1.06
	WF-1		89.5	177	20.9	79.3	14.2	2.93	11.9	2.05	11.6	2.24	6.58	1.04	6.69	0.98
	WF-2		78.2	161	18.9	70.4	12.7	2.64	10.6	1.79	10.4	2.01	5.84	0.92	6	0.85
	SDH-1		90.9	182	21.3	79.9	13.9	2.45	11.6	1.96	11.4	2.23	6.5	1.04	6.74	0.97
	HSP702B1		88.8	148	18	72.8	11.5	2.21	10.1	1.56	8.5	1.64	4.94	0.8	5.31	0.8
	HSP705B1		68.7	131	16.2	62.5	11	2.27	9.64	1.67	9.79	1.89	6.13	0.96	6.25	0.92
	WF01B1		81.9	163	18.5	70.9	13.9	2.43	11.1	1.75	10.6	2.14	6.39	0.93	5.89	0.94
	MZJ02B1		133	259	29.5	109	18.9	2.94	15.5	2.35	13.8	2.83	8.35	1.26	7.67	1.28
	HSP706B1	Andesite	41.7	82	10.5	42.8	7.93	2.18	7.68	1.33	7.77	1.47	4.49	0.68	4.31	0.59
	HSP709B2	Rhyolite	96.3	179	21.4	81.7	13.8	2.63	12.4	1.98	11	2.2	7.02	1.12	7.35	1.11
	QMD13B4	Basaltic andesite	41.5	82	10.4	42.5	7.96	2.25	7.86	1.37	7.89	1.54	4.84	0.77	4.65	0.68
	14LP05	greenschists	4.91	12.5	1.92	9.67	2.92	0.96	3.36	0.6	3.86	0.79	2.28	0.33	2.08	0.32	Chen, G., Luo, J., Xu, H., You, J., Li, Y., Che, Z., 2019. Geological significance of the former Xiong’er Volcanic Belt on the southwestern margin of the North China Craton. Frontiers of Earth Science 13, 191-208.
	14LP06		6.89	18.2	2.88	14.4	4.5	1.52	5.23	0.94	5.97	1.22	3.46	0.49	3.09	0.46
	14LP07		5.96	16	2.52	12.6	4.01	1.44	4.66	0.84	5.36	1.11	3.13	0.45	2.89	0.42
	14LP08		5.26	13.8	2.18	11	3.48	1.27	4.08	0.73	4.77	0.98	2.77	0.4	2.62	0.38
	14LP09		5.42	14.7	2.3	11.7	3.76	1.3	4.36	0.77	5.01	1.03	2.86	0.42	2.63	0.39
	14LP10		5.77	15.8	2.5	12.6	4.01	1.39	4.7	0.84	5.36	1.1	3.05	0.44	2.8	0.41
	14LP11		6.5	17.4	2.75	13.8	4.36	1.55	5.14	0.92	5.95	1.24	3.45	0.5	3.25	0.47
	14LP12		6.04	15.9	2.53	12.7	4.07	1.49	4.72	0.84	5.41	1.12	3.16	0.45	2.94	0.43
	14LP13		5.32	14.3	2.27	11.4	3.63	1.28	4.25	0.77	4.88	1.01	2.84	0.4	2.67	0.39
	14LP14		5.75	15.1	2.39	12	3.85	1.36	4.49	0.81	5.1	1.06	2.96	0.43	2.82	0.41
	HHY002	Andesite	31.04	65.35	7.92	34.44	5.86	1.65	5.27	0.73	3.86	0.75	2.13	0.38	2.17	0.29	Zhang, H.W., Zhang, D.T., Feng, J.Z., 2015. Geochemical characteristics of Xionger group in western Henan Province and its role in mineralization. West-China Exploration Engineering 27, 126-130.
	HHY003		33.14	72.49	9.53	40.38	7.02	1.84	6.14	0.94	4.79	0.91	2.69	0.44	2.65	0.35
	HHY004		40.15	87.15	11.12	48.52	8.42	2.23	7.26	1.14	5.68	1.13	3.09	0.49	2.91	0.37
	HHYB1		34.82	68.9	8.84	36.95	6.13	1.69	5.15	0.77	4.15	0.82	2.21	0.38	2.27	0.31
	HHYB2		33.72	74.71	10.03	43.8	7.69	2.42	6.39	1.06	5.35	1	2.69	0.45	2.63	0.34
	XSD010	Andesite	44.9	96.26	12.97	51.79	9.95	2.31	8.09	1.31	7.33	1.37	3.75	0.58	3.21	0.51
	XSD011		29.74	60.24	8.03	30.5	5.61	1.61	4.6	0.74	3.91	0.75	2.08	0.33	1.99	0.32
	XSD013		31.4	71.09	9.18	34.84	7.06	1.8	5.92	1.06	5.88	1.15	3.09	0.47	2.51	0.36
	XSD015		30.12	65.03	8.79	35.8	7.11	1.67	5.93	1.04	5.63	1.11	2.82	0.44	2.32	0.37
	XSD016		38.97	97.46	13.58	54.78	10.84	2.76	8.53	1.45	7.86	1.55	4.34	0.66	3.64	0.54
	LN09-30	diorites	81.16	160.18	19.85	74.24	13.21	2.59	11.41	1.74	9.86	2	5.51	0.81	5.08	0.78	Cui, M., Zhang, B., Zhang, L., 2011. U–Pb dating of baddeleyite and zircon from the Shizhaigou diorite in the southern margin of North China Craton: Constrains on the timing and tectonic setting of the Paleoproterozoic Xiong'er group. Gondwana Research 20, 184-193.
	LN09-31		78.75	157.68	19.04	71.7	12.62	2.98	11.21	1.63	9.22	1.92	5.22	0.78	4.91	0.74
	LN09-32		73.01	148.62	18.17	72.43	12.38	2.69	10.6	1.59	9.15	1.88	5.12	0.74	4.91	0.73
	LN09-33		65.05	132.61	16.59	63.34	11.35	2.55	10.1	1.49	8.34	1.67	4.64	0.68	4.35	0.68
	LN09-34		76.65	158.72	19	74.35	12.59	2.61	11.54	1.68	9.34	1.91	5.27	0.77	4.8	0.74
	LN09-35		74.86	154.4	18.56	74.21	12.56	2.59	11.44	1.67	9.41	1.93	5.23	0.78	4.81	0.74
	X Y-3	Argillaceous rock	25.8	46	6.07	24.8	5.12	0.98	5.07	0.78	5.04	1.02	2.96	0.43	2.75	0.44	Xu, Y.H., Zhao, T.P., Zhang, Y.X., 2008. Geochemical Characteristics and Geological Significances of the Dagushi Formation Siliciclastic Rocks , the Paleoproterozoic Xiong’er Group from the Southern North China Craton. Geological Review 54, 316-326.
	X Y-5-2		22.6	44	6.17	27.4	6.35	0.93	5.25	0.92	6.22	1.35	3.67	0.56	3.53	0.58
	X Y-7		53.6	100	11.3	40.4	7.05	1.03	8.82	1.1	6.62	1.26	3.28	0.46	2.73	0.43
	X Y-10		16.7	29.1	3.5	13.6	2.57	0.49	2.82	0.4	2.44	0.49	1.38	0.2	1.12	0.17
	X Y-12		29.7	48.7	6.01	22.5	3.79	0.54	4.42	0.58	3.54	0.77	1.99	0.28	1.59	0.25
	XY-15		67.7	124	13.5	46.6	7.2	1.02	9.39	1.17	6.81	1.24	3.3	0.49	2.75	0.43
	X Y-16		55.9	103	11.5	40.4	7.04	1.23	8.95	1.16	7.07	1.22	3.18	0.49	2.75	0.45
	X Y-18		52	106	11.5	40.3	6.46	1.19	8.99	1.09	6.67	1.26	3.25	0.46	2.72	0.44
	XY-46	Chert	4.9	9.36	0.95	3.62	0.67	0.12	0.82	0.11	0.66	0.13	0.36	0.05	0.34	0.06	Xu, Y.H., Zhao, T.P., Hu, J.L., 2008. Geochemical Characteristics and sedimentary environment of cherts from the Paleoproterozoic Xiong’er Group in the southern part of the north China Block. Acta Sedimentologica Sinica 26, 602-609.
	XY-90		33.8	61.3	7.77	28.8	3.86	0.54	2.15	0.24	0.87	0.14	0.42	0.05	0.36	0.06
	XY-175		4.73	7.33	0.92	3.59	0.91	0.22	1	0.12	0.66	0.12	0.31	0.05	0.3	0.05
	XY-200-1		96.5	167	17.6	66.1	9.75	2.25	5.91	0.92	6.74	1.33	3.62	0.53	3.16	0.51
	RS-6		47.7	92.3	10.6	40.7	7.38	1.21	8.72	1.19	7.11	1.44	3.64	0.49	3.22	0.52
	Zd-32	High potassium basaltic andesite	22.33	54.81	5.41	24.13	4.67	1.4	4.36	0.77	4.41	0.95	2.69	0.45	2.82	0.44	Zhao, T.P., Jin, C.W., Zhai, M.G., 2002. Geochemistry and petrogenesis of the Xiong’er Group in the southern regions of the North China Craton. Acta Petrologica Sinica 18, 59-69.
	Jd-16		24.26	58.99	6.13	24.83	4.98	1.47	4.64	0.82	4.67	0.98	2.87	0.48	2.83	0.44
	Sy-33		34.9	76.55	8.42	37.28	7.12	1.88	6.18	1.08	5.7	1.23	3.45	0.5	2.78	0.52
	Xs-23		22.63	54.98	5.4	24.83	4.6	1.49	4.24	0.77	4.16	0.95	2.55	0.43	2.62	0.4
	Wf-8		42.73	105.38	11.92	49.87	8.98	2.32	7.39	1.28	6.24	1.31	3.63	0.59	3.49	0.54
	Xy-23	shoshonite	29.45	69.29	6.94	33.24	6.16	1.78	5.44	0.87	5.39	1.17	3.14	0.53	3.24	0.49
	Wf-9		48.1	115.45	11.74	52.5	10	2.48	9.01	1.51	7.79	1.67	4.68	0.76	4.53	0.67
	Wf-17		28.4	67.07	7.04	31.42	5.65	1.76	4.86	0.83	4.49	0.93	2.55	0.43	2.4	0.37
	Sy-11		28.55	70.84	7	32.25	6.25	1.88	5.74	0.98	5.4	1.14	3.23	0.55	3.31	0.49
	Zd-17	Olivine trachyandesite	38.41	84.49	8.73	39.88	7.32	2.2	5.92	1	5.28	1.09	3.08	0.5	3.01	0.45
	Wf-6		37.97	92	9.61	39.33	7.6	1.97	6.83	1.2	6.5	1.33	3.83	0.64	3.68	0.56
	Zd-31	High potassium andesite	39.26	91.69	8.79	38.83	6.84	1.83	5.78	1.01	5.38	1.13	3.14	0.5	2.99	0.45
	Sx-4		48.97	100.86	11.27	47.76	9.34	2.15	8.27	1.38	7.72	1.62	4.77	0.76	4.74	0.71
	Jy-11		68.46	165.78	16.42	74.35	12.53	2.87	9.91	1.48	7.83	1.57	4.19	0.64	3.83	0.56
	Jy-7		52.94	133.46	13.52	59.11	11.15	2.88	9.02	1.51	7.05	1.46	3.94	0.62	3.5	0.53
	Sy-22		45.44	101.4	10.38	44.67	8.3	2.06	6.99	1.19	6.13	1.31	3.59	0.57	3.39	0.52
	Xs-36	Latite	37.31	85.57	8.76	39.14	7.3	1.98	6.52	1.14	6.44	1.31	3.81	0.61	3.69	0.57
	Xs-27		35.31	81.02	8.25	36.16	7.08	1.6	6.12	1.11	5.84	1.28	3.57	0.59	3.68	0.54
	Jy-5		46.52	97.52	9.98	42.32	7.7	1.86	6.35	1.09	5.49	1.17	3.2	0.52	3.02	0.45
	Zd-2-2		52.81	128.46	12.64	55.39	10.97	2.78	9.54	1.65	8.2	1.67	4.7	0.74	4.41	0.65
	Wf-22		29.75	78.16	8.47	36.23	7.66	1.61	6.82	1.23	6.81	1.43	3.85	0.66	4.15	0.62
	Wf-23		63.05	141.54	13.75	58.58	10.27	2.39	8.83	1.57	7.78	1.61	4.49	0.74	4.51	0.65
	Jy-6-1	Trachy dacite	76.12	152.6	16.82	70.68	12.08	2.68	9.24	1.53	7.37	1.52	4	0.68	3.97	0.59
	Wf-13		71.93	156.93	15.5	66.47	12.04	2.7	10.86	1.92	10.55	2.16	6.08	0.95	5.98	0.93
	Sx-3	Rhyolite	81.79	170.25	18.08	75.88	13.61	3.03	11.02	1.74	9	1.79	5.04	0.85	5.12	0.79
	Xs-25		81.69	156.22	16.19	66.26	11.81	2.23	9.67	1.67	9.06	1.84	5.23	0.85	5.33	0.8
	Hm-8		98.13	187.77	22.5	77.46	13.15	2.17	11.33	1.93	10.78	2.15	6.31	1.02	6.44	0.98
	Sy-44		57.89	114.28	13.38	56.93	10.05	2.14	8.46	1.61	9.12	1.83	5.2	0.85	5.34	0.8
	13QL05	volcanic rocks	53.6	106.78	13.16	51.94	9.51	2.29	8.45	1.2	7.03	1.39	4.02	0.58	3.69	0.55	HuYan, Y.Y., Lu, Y., 2016. Zircon U-Pb age and geochemical characteristics of Xiong’er Group volcanic rocks from Xiaoqinling Area. Geological Science and Techonology Information 35, 1-8.
	13QL06		45.7	92.54	11.51	45.86	8.57	2.08	7.62	1.11	6.5	1.32	3.83	0.55	3.59	0.53
	13QL07		40.5	82.39	10.46	42.35	8.26	1.94	7.55	1.15	6.9	1.41	4.11	0.6	3.85	0.58
	13QL08		41.4	81.34	10.15	40.62	7.62	1.81	6.83	0.99	5.76	1.15	3.28	0.47	3.07	0.45
	13QL09		46.2	90.85	11.38	45.51	8.53	2.17	7.77	1.14	6.79	1.38	3.99	0.58	3.73	0.56
	13QL10		22.5	44.4	5.62	23.14	4.59	1.24	4.31	0.64	3.92	0.8	2.36	0.34	2.27	0.34
	13QL11		47	93.38	11.56	46.16	8.63	2.08	7.83	1.16	6.98	1.42	4.07	0.59	3.78	0.57
	13QL12		41.1	84.45	10.62	42.43	8.12	1.99	7.39	1.1	6.61	1.35	3.95	0.58	3.76	0.57
	13QL13		47	95.17	11.83	47.11	8.94	2.12	8.21	1.22	7.3	1.51	4.33	0.63	4.05	0.6
	13QL14		34.3	69.34	8.3	31.97	5.79	1.24	5.54	0.89	5.79	1.26	3.86	0.58	3.67	0.55
	13QL14R		34.7	70.02	8.25	31.75	5.71	1.22	5.47	0.88	5.76	1.26	3.83	0.57	3.67	0.53
	13QL15		49.5	100.02	12.32	48.55	9.4	1.91	8.28	1.21	7.06	1.39	3.96	0.56	3.63	0.53
	13QL16		51.3	103.5	12.43	48.12	9.15	1.85	8.13	1.19	6.93	1.37	3.95	0.57	3.66	0.54
	13QL17		47.1	97.94	11.94	46.1	8.75	1.82	7.97	1.12	6.58	1.26	3.6	0.51	3.31	0.49
	13QL18		5.6	90.29	11.14	44.58	8.67	1.96	7.94	1.17	6.87	1.38	3.95	0.58	3.69	0.54
	13QL19		56.6	109.97	13.55	53.5	9.79	2.44	8.75	1.27	7.39	1.49	4.34	0.62	4.05	0.6
	13QL20		49	96.21	11.77	46.72	8.61	2.03	7.81	1.15	6.91	1.41	4.1	0.59	3.81	0.57
Guandaokou Group	Hu-11	Sandstone	12.8	23.5	2.6	8.98	1.48	0.32	1.01	0.16	0.79	0.16	0.49	0.07	0.44	0.07	Hu, G.H., Zhao, T.P., Zhou, Y.Y., Wang, S.Y., 2013. Meso-Neoproterozoic sedimentary formation in the southern margin of the North China Craton and its geological implications. Acta Petrologica Sinica 29, 2491-2507.
	Hu-14		53.4	99.1	10.6	35.1	5.27	1.09	4	0.63	3.06	0.62	1.99	0.28	1.87	0.28
	Hu-18		50.6	90.6	10.2	35.1	5.47	1.18	4.04	0.62	3.04	0.61	1.92	0.26	1.71	0.25
	Hu-20		39.6	75	8.27	27.9	4.42	0.84	3.22	0.54	2.75	0.54	1.68	0.23	1.46	0.21
	Hu-21		12.4	18.1	1.98	6.46	0.87	0.16	0.59	0.1	0.46	0.09	0.27	0.04	0.24	0.04
	GSH12-2		12.1	21.4	2.3	7.56	1.34	0.28	1.2	0.21	1.12	0.24	0.75	0.11	0.76	0.12
	GSH12-5		46.2	87.9	9.76	34.7	5.99	1.11	4.42	0.64	3.09	0.61	1.88	0.25	1.67	0.25
	GSH12-11		52.8	99	11.4	40	6.88	1.29	5.16	0.75	3.6	0.71	2.2	0.31	1.98	0.29
	Hu-13	Siliceous dolomite	29.8	56	6.26	20.9	3.24	0.54	2.48	0.39	1.92	0.41	1.36	0.2	1.37	0.2
	GSH12-1		12.9	21.4	2.56	9.48	1.99	0.39	3.09	0.32	1.68	0.33	0.94	0.12	0.78	0.11
	GSH12-7		7.88	16.4	2.07	9.67	3.49	0.9	4.11	0.6	3.04	0.54	1.3	0.16	0.99	0.15
Luanchuan Group	20049	Calcareous schist	53	91	12	45	8.5	1.47	7.56	1	4.13	1.02	2.75	0.41	3.02	0.45	Yan. K., 2005. Stratigraphic characteristics of Luanchuan group in Southwest Henan Province and its relationship with Pb Zn mineralization. China University of Geosciences (Beijing).
	200410	Carbonaceous phyllite	54	84	14	60	12	2.2	9.89	1.94	10.76	2.22	6.35	1.04	5.67	0.84
	200416	Marble	7.79	14.8	1.5	5.24	0.963	0.23	1.031	0.18	1.118	0.22	0.662	0.08	0.62	0.09
	200418	Sericite schist	34	65	8.6	33.3	6.12	1.14	4.34	0.9	4.02	0.72	1.95	0.3	1.67	0.24
	200426	Marble	10.4	21.5	2.6	9.79	2.03	0.46	1.59	0.32	1.49	0.29	0.73	0.09	0.73	0.1
	200432	Sericite schist	39	76	9.8	38	7.38	1.27	5.98	1.13	6.42	1.13	3.3	0.57	3.86	0.51
	200438	Biotite schist	24	49	6.2	25	4.49	0.79	4.24	0.74	5.64	0.86	2.57	0.4	3.54	0.33
Dahongkou Formation	0296/ 1	Metatrachyte	116.07	234.49	27.72	93.14	17.28	3.18	11.95	1.88	10.22	1.95	5.33	0.84	5.3	0.79	Wang, Y.F., 2000. Preliminary study on volcanic rocks of Dahongkou formation in Luanchuan group. Henan Geology 18, 181-189.
	0296/2		66.67	133.12	16.04	60.38	10.93	4.55	7.24	0.98	4.98	0.9	2.27	0.32	1.75	0.23
	1013/1		138	231	19.8	55.43	8.17	1.9	6.37	2.8	6.64	1.36	4.56	0.58	3.82	0.46
	1551/1		109.93	169.14	27.03	90.41	15.78	2.54	10.88	1.95	9.76	1.95	5.66	0.91	5.58	0.84
	2167/1		150.5	286	36.89	137.4	20.04	9.26	14.11	1.24	6.51	1.13	2.49	0.34	1.89	0.28
	BC-13-2	Metatrachyte	72.18	123.46	18.52	50.18	13.07	2.93	7.96	1.4	5.8	1.24	3.23	0.48	2.63	0.35	Jiang, G.Q., 1993. Characteristics of Dahongkou Formation and Yuku Formation and their tectonic environment in Luanchuan Area, Henan Province. Geoscience 7, 138-144.
	BC-14-2		83.92	138.22	19.02	48.66	1.54	4.55	9.62	1.74	7.12	1.35	3.35	0.47	2.52	0.37
	BC-18-2		123.4	155.54	26.2	65.72	18.29	2.29	10.9	1.93	8.88	1.97	5.37	0.82	4.54	0.61
	BC-19-2		123.4	151.86	32.02	72.3	16.51	2.44	10	1.77	8.88	1.91	5.29	0.78	4.45	0.56
	BC-22-2	Metagabbro	46.8	89.7	11.12	30.4	12.15	3.57	7.68	1.4	5.6	1.04	2.57	0.4	1.67	0.24
Zhushadong Formation	xjls02-5	Sandstone	0.99	1.85	0.2	0.29	0.16	0.03	0.2	0.03	0.16	0.03	0.09	0.01	0.09	0.01	Zhang, B.X., 2018. Sedimentary environment and source characteristics of Lower Cambrian Zhushadong formation in Southwest Henan Province. China University of Geosciences (Beijing).
	xjls02-6		1.38	2.9	0.34	0.79	0.29	0.06	0.33	0.05	0.32	0.06	0.2	0.03	0.19	0.03
	xjls02-7		1.1	2.2	0.26	0.46	0.23	0.04	0.28	0.04	0.24	0.05	0.15	0.02	0.13	0.02
	xjls03-3		14.84	28.85	3.48	7.99	2.92	0.63	3.62	0.53	3.13	0.64	2	0.28	1.82	0.28
	xjls03-8		1.66	2.65	0.27	0.3	0.16	0.04	0.2	0.02	0.12	0.02	0.06	0.01	0.06	0.01
Zhangxia Formation	Z1	Microcrystalline dolomite	17.47	31.29	3.82	11.78	1.99	0.39	1.8	0.26	1.55	0.28	0.82	0.14	0.95	0.12	He, Z.M., 2017. Study on the formation mechanism of the Triassic Wuzi formation in the Ordos Basin. Chengdu University of Technology.
	Z2	Fine grained bioclastic gravelly limestone	10.12	21.69	2.36	9.02	1.84	0.4	1.85	0.28	1.47	0.31	0.81	0.12	0.75	0.11
	Z3	Oolitic limestone	12.5	25.09	2.99	11.21	2.17	0.42	1.85	0.27	1.92	0.38	1.03	0.17	1.11	0.16
	Z4	Bright crystal Oolitic Limestone	6.55	13.14	1.31	5.55	0.99	0.19	0.89	0.09	0.8	0.15	0.4	0.06	0.29	0.05
	Z5	Fine sand gravel limestone	22.58	46.13	5.14	19.33	3.68	0.69	3.2	0.47	2.91	0.51	1.47	0.22	1.37	0.21
	Z6	Bright crystal Oolitic Limestone	9.28	21.31	2.32	7.83	1.58	0.28	1.44	0.21	1.15	0.2	0.54	0.08	0.58	0.07
	Z7	Powder crystal arenaceous limestone	14.64	34.65	4.16	15.68	3.16	0.56	2.74	0.41	2.26	0.38	1.02	0.15	0.97	0.13
	Z8	Dolomite spar Oolitic Limestone	4.67	9.97	0.94	3.75	0.81	0.14	0.76	0.12	0.72	0.13	0.37	0.05	0.33	0.04
	Z9	Trilobite Oolitic Limestone	2.56	5.32	0.56	2.1	0.44	0.09	0.41	0.06	0.36	0.07	0.19	0.03	0.21	0.03
	Z10	Oolitic fine crystalline dolomite	2.72	5.55	0.54	2.02	0.4	0.09	0.39	0.06	0.4	0.07	0.19	0.03	0.18	0.03
	Z11		3.19	5.07	0.82	4.59	0.98	1.13	0.59	0.14	0.74	0.13	0.3	0.04	0.19	0.02
	Z12	Arenaceous dolomite	3.13	6.62	0.93	4.44	1.18	0.09	0.59	0.2	1.11	0.21	0.51	0.06	0.36	0.41
	Z13	Fine medium crystalline dolomite	1.89	5.53	0.8	3.95	1.04	0.13	0.57	0.13	0.74	0.14	0.35	0.05	0.26	0.03
	Z14	Oolitic dolomite	1.42	3.59	0.48	2.23	0.55	0.1	0.44	0.1	0.59	0.12	0.29	0.04	0.23	0.03
	Z15		2.76	7.12	0.93	4.18	1	0.16	0.8	0.21	1.23	0.25	0.62	0.08	0.49	0.07
	Z16		6.84	14.88	1.77	7.25	1.29	0.23	0.96	0.21	1.36	0.3	0.83	0.12	0.79	0.11
	Z17	Oolitic dolomite	1.24	2.45	0.35	1.67	0.3	0.04	0.2	0.05	0.32	0.07	0.19	0.03	0.17	0.03
	Z18		3.24	8.21	1.06	4.68	1.18	0.22	1	0.24	1.5	0.32	0.86	0.12	0.77	0.1
	Z19		3.73	9.41	1.27	5.93	1.28	0.17	0.86	0.23	1.34	0.27	0.67	0.09	0.52	0.07
Sanshanzi Formation	S1	Fine grained dolomite	4.03	8.74	0.81	2.91	0.58	0.11	0.5	0.08	0.44	0.08	0.22	0.03	0.26	0.03	He, Z.M., 2017. Study on the formation mechanism of the Triassic Wuzi formation in the Ordos Basin. Chengdu University of Technology.
	S2	Silty fine crystalline dolomite	2.89	5.58	0.58	2.1	0.39	0.07	0.34	0.05	0.29	0.05	0.14	0.02	0.18	0.02
	S3	Fine grained dolomite	13.33	28.5	3.57	14.6	2.7	0.52	2.37	0.35	2.04	0.38	1.09	0.16	0.94	0.15
	S4	Fine grained dolomite	6.87	13.43	1.6	6	1.13	0.22	0.96	0.11	0.9	0.16	0.49	0.07	0.42	0.06
	S5	Fine grained dolomite	4.38	8.96	1.2	5.37	0.83	0.16	0.72	0.07	0.65	0.12	0.34	0.05	0.2	0.06
	S6	Fine-coarse grained dolomite	3	5.1	0.54	2.04	0.36	0.07	0.39	0.05	0.28	0.06	0.17	0.03	0.16	0.02
	S7	Fine grained dolomite	1.87	2.99	0.41	1.55	0.27	0.05	0.25	0.02	0.2	0.04	0.1	0.02	0.12	0.01
	S8	Fine grained dolomite	7.02	11.09	1.16	4.16	0.73	0.17	0.8	0.1	0.53	0.11	0.29	0.04	0.25	0.04
	S9	Sand-bearing dolomite	6.32	9.97	1.19	4.23	0.79	0.15	0.66	0.06	0.58	0.11	0.32	0.05	0.31	0.05
	S10	Glutenite dolomite	4.12	7.28	0.87	3.21	0.6	0.11	0.51	0.02	0.44	0.08	0.2	0.04	0.22	0.03
	S11	Fine grained dolomite	5.81	11	1.34	5.03	1.01	0.24	0.98	0.13	0.72	0.15	0.4	0.06	0.37	0.05
	S12	Fine grained dolomite	7.19	15.25	1.82	7.08	1.48	0.35	1.42	0.2	1.01	0.22	0.54	0.08	0.51	0.07
	S13	Residual sand debris fine crystalline dolomite	6.68	8.83	0.92	3.39	0.62	0.14	0.68	0.09	0.47	0.1	0.27	0.04	0.22	0.03
	S14		6.73	8.92	0.94	3.46	0.65	0.14	0.73	0.09	0.49	0.1	0.27	0.04	0.23	0.03
	S15		5.37	9.05	0.92	3.33	0.61	0.15	0.64	0.09	0.48	0.1	0.27	0.04	0.22	0.03
	S16	Calcareous dolomite with lithic debris	8.94	16.45	1.83	6.86	1.34	0.3	1.42	0.18	0.91	0.19	0.49	0.07	0.43	0.06
	S17	Fine grained dolomite	1.45	2.75	0.3	1.18	0.23	0.05	0.24	0.03	0.17	0.04	0.09	0.01	0.07	0.01
	S18	Fine grained dolomite	5.61	9.55	1.04	3.91	0.75	0.17	0.75	0.11	0.57	0.12	0.31	0.05	0.29	0.04
	S19	Fine grained dolomite	5.02	9.32	1	3.71	0.78	0.27	0.7	0.11	0.6	0.11	0.29	0.04	0.25	0.03
	S20	micritic dolomite	5.85	10.81	1.2	4.13	0.81	0.17	0.71	0.11	0.67	0.12	0.35	0.05	0.44	0.04
	S21	Silty dolomite	5.36	8.75	1.07	3.65	0.77	0.16	0.65	0.06	0.79	0.12	0.35	0.05	0.34	0.05
	S22	Fine grained dolomite	11.17	22.34	2.54	9.85	1.89	0.37	1.61	0.21	1.48	0.26	0.76	0.11	0.65	0.1
	S23	Fine grained dolomite	7.37	16.43	2.22	8.51	1.8	0.33	1.48	0.18	1.24	0.22	0.61	0.09	0.49	0.08
	S24	Fine grained dolomite	3.04	5.1	0.55	2.05	0.38	0.09	0.4	0.06	0.3	0.07	0.18	0.03	0.16	0.02
	S25		2.28	4.56	0.49	2.18	0.37	0.07	0.32	0.02	0.29	0.05	0.14	0.02	0.09	0.02
	S26		3.31	6.33	0.74	2.58	0.5	0.09	0.44	0.02	0.41	0.08	0.22	0.03	0.19	0.03
	S27		4.98	7.74	0.77	2.96	0.5	0.09	0.44	0.08	0.41	0.08	0.23	0.04	0.26	0.05
	S28		1.94	3.61	0.41	1.34	0.29	0.05	0.25	0.04	0.22	0.04	0.12	0.02	0.08	0.01
	S29		4.04	9.15	1.11	4.35	0.89	0.16	0.76	0.08	0.76	0.14	0.41	0.06	0.41	0.06
	S30		5.85	11.25	1.43	4.65	0.91	0.16	0.81	0.08	0.73	0.14	0.4	0.06	0.39	0.06
	S31	Medium-coarse grained dolomite	4.14	9.99	1.18	4.76	1.24	0.15	0.7	0.17	1.01	0.21	0.52	0.07	0.42	0.06
	S32	Edgewise limestone	4.45	9.6	1.13	4.56	1.33	0.19	0.93	0.24	1.33	0.25	0.6	0.08	0.42	0.06
	P03-14	dolomite	0.243	0.573	0.068	0.314	0.064	0.016	0.071	0.01	0.042	0.008	0.021	0.003	0.016	0.003	Shen, F., Zhou, C.Y., Li, F.J., Zhang, H., Chen, Z.A., Ni, Z.Y., 2018. Genesis of Cambrian Sanshanzi Formation dolomite in Helanshan Mountain area, Ordos Basin, China. Journal of Chengdu University of Technology 45, 402-414.
	P03-21		0.907	1.666	0.185	0.671	0.113	0.02	0.127	0.02	0.093	0.021	0.055	0.008	0.053	0.009
	P03-36		2.568	5.583	0.716	2.811	0.549	0.109	0.548	0.078	0.381	0.08	0.203	0.028	0.169	0.024
	P03-43		11.184	27.827	2.666	10.766	2.478	0.56	2.787	0.475	2.771	0.609	1.666	0.262	1.663	0.269
	P03-86		0.439	0.943	0.093	0.415	0.065	0.012	0.078	0.011	0.054	0.011	0.033	0.004	0.023	0.003
	P03-96		7.187	15.253	1.824	7.082	1.479	0.35	1.42	0.197	1.007	0.22	0.542	0.082	0.51	0.075
	P03-97		6.729	8.921	0.944	3.455	0.645	0.144	0.729	0.094	0.488	0.101	0.266	0.04	0.227	0.035
	P03-111		1.454	2.746	0.301	1.178	0.227	0.053	0.238	0.028	0.167	0.036	0.093	0.014	0.074	0.01
	P03-118		3.201	6.387	0.714	2.583	0.475	0.105	0.476	0.068	0.362	0.075	0.218	0.035	0.203	0.032
	P03-123		2.841	6.04	0.743	2.909	0.563	0.095	0.513	0.073	0.368	0.072	0.192	0.027	0.152	0.022
	P03-124		3.186	5.634	0.652	2.402	0.495	0.111	0.453	0.064	0.356	0.076	0.196	0.032	0.188	0.029
	P08-107		10.117	21.695	2.361	9.023	1.838	0.4	1.851	0.282	1.471	0.309	0.808	0.12	0.751	0.112
	P08-141		2.997	5.095	0.543	2.044	0.36	0.07	0.392	0.05	0.277	0.064	0.172	0.026	0.163	0.023
	P08-143		7.022	11.087	1.159	4.162	0.727	0.165	0.805	0.101	0.535	0.11	0.293	0.044	0.252	0.039
	P08-181		5.81	11.001	1.345	5.027	1.012	0.24	0.98	0.126	0.721	0.152	0.4	0.061	0.37	0.054
	P08-185		3.476	7.434	0.925	3.605	0.795	0.206	0.728	0.12	0.659	0.139	0.36	0.054	0.323	0.048
Majiagou Formation	XT1-5	dolomite	0.31	0.68	0.171	1.48	0.36	0.04	0.214	0.06	0.315	0.057	0.127	0.015	0.08	0.01	Su, Z.T., Chen, H.D., Xu, F.Y., Zhang, C.G., Lin, L.B., 2012. REE characters of the Majiagou dolomites in Ordos Basin. Journal of Jilin University 42, 53-61.
	XT1-8		0.4	0.51	0.138	1.29	0.29	0.03	0.169	0.05	0.265	0.048	0.109	0.013	0.07	0.01
	YT1-4		13.77	29.6	3.621	15.23	2.76	0.17	1.165	0.42	2.39	0.466	1.134	0.147	0.84	0.11
	YT1-5		1.71	3.62	0.528	2.65	0.69	0.07	0.383	0.11	0.62	0.12	0.289	0.037	0.21	0.03
	HT1-2		2.77	5.83	0.809	3.86	98	0.08	0.509	0.17	0.917	0.169	0.391	0.048	0.26	0.03
	Y2-10	dolomite	25.32	51.6	6.193	25.55	4.33	0.83	2.712	0.73	4.374	0.898	2.301	0.312	1.89	0.27
	CC1-5	dolomite	27.89	52.83	7.098	32.78	4.93	0.45	2.76	0.89	5.001	0.963	2.312	0.296	1.67	0.22
	CC1-8	dolomite	1.9	4.55	0.607	2.78	0.55	0.09	0.392	0.09	0.487	0.09	0.209	0.026	0.14	0.02
	CT1-2	dolomite	2.88	5.51	0.879	4.82	1.18	0.1	0.601	0.19	1.076	0.209	0.505	0.065	0.37	0.05
	L1-3	dolomite	25.93	57.39	6.911	28.61	4.87	0.54	2.937	0.84	5.252	1.125	3.008	0.428	2.69	0.41
	YT1-6	dolomite	1.12	2.8	0.487	2.91	0.59	0.04	0.289	0.11	0.572	0.102	0.226	0.027	0.14	0.02
	CC1-10	dolomite	0.8	1.81	0.369	2.58	0.49	0.07	0.346	0.09	0.538	0.11	0.281	0.038	0.23	0.03
	Sh15-9	dolomite	0.23	0.95	0.139	0.7	0.21	0.03	0.151	0.04	0.222	0.042	0.1	0.013	0.07	0.01
	Sh15-16	dolomite	2.07	5.39	0.682	2.97	0.72	0.11	0.434	0.09	0.528	0.106	0.266	0.036	0.21	0.03
	I3-7	dolomite	44	89.41	9.598	35.42	6.05	0.74	3.355	0.8	4.807	0.99	2.542	0.348	2.1	0.35
	Ch2-1	dolomite	0.54	1.14	0.162	0.79	0.22	0.04	0.174	0.04	0.258	0.057	0.157	0.023	0.15	0.02
	Ch2-3	dolomite	2	3.5	0.436	1.87	0.29	0.04	0.195	0.05	0.295	0.06	0.151	0.02	0.12	0.016
	L6-11		1.46	2.3	0.358	1.9	0.39	0.04	0.214	0.06	0.329	0.062	0.145	0.018	0.1	0.013
	L6-15	dolomite	0.97	1.64	0.254	1.35	0.24	0.03	0.131	0.03	0.176	0.035	0.89	0.012	0.07	0.01
	L6-16		1.23	1.92	0.372	2.48	0.39	0.06	0.262	0.06	0.366	0.077	0.2	0.028	0.17	0.023
	L6-21	dolomite	1.51	2.36	0.442	2.84	0.49	0.06	0.32	0.09	0.528	0.106	0.266	0.036	0.21	0.03
	Ch2-4	Micritic limestone	13	28.36	3.182	12.27	3.27	0.36	1.958	0.56	3.624	0.804	2.223	0.328	2.13	0.34
Taowan Group	H-BS-2	Sericite quartz phyllite	23.73	43	5.44	20.22	4.11	14.06	3.87	0.88	4.28	1.14	2.39	0.56	5	0.89	Wang, L.S., 2009. Geological geochemistry and metallogenic regularity of black rock series and its typical deposits in Qinling, Shaanxi Province. Northwestern University.
	H-BS-3	Carbonaceous argillaceous silicalite	30.63	56.16	5.12	16.47	1.7	1.7	2.91	0.51	1.23	0.37	1.44	0.31	1.64	0.27
	H-BS-4	Carbonaceous phyllite	104.5	174.2	19.48	64.09	2.21	2.21	10.28	1.23	3.79	0.83	4.3	0.38	2.9	0.35
	H-JS-1	Carbonaceous phyllite	31.18	52.66	5.81	16.97	2.96	2.96	3.15	0.45	1.82	0.52	1.72	0.33	2.28	0.31
	H-JS-4	Silty phyllite	46.18	100.1	11.98	48	3.67	3.67	7.73	1.04	5.27	1.31	4.59	0.51	4.06	0.55
	H-JS-5	Crystalline limestone	9.96	12.61	2.05	5.82	3.07	3.07	1.17	0.16	1.04	0.22	1.03	0.09	0.67	0.12
	H-JS-6	Carbonaceous phyllite	32.45	59.19	7	23.8	4.22	4.22	3.97	0.6	3.3	0.86	2.31	0.41	3.01	0.43

## Sheet: S2
Group	sample number	lithotype	La	Ce	Pr	Nd	Sm	Eu	Gd	Tb	Dy	Ho	Er	Tm	Yb	Lu	Reference
Qinling Group	QL1414	Biotite schist	34	69	8.8	35	6.6	1.4	6.2	1	5.9	1.2	3.5	0.5	3.6	0.6	Shi, Y., Huang, Q., Liu, X., Krapež, B., Yu, J., Bai, Z., 2018. Provenance and tectonic setting of the supra-crustal succession of the Qinling Complex: Implications for the tectonic affinity of the North Qinling Belt, Central China. Journal of Asian Earth Sciences 158, 112-139.
	QL1430	Gneiss	36	70	8.2	31	5.9	1	5.8	0.9	5.1	1	2.9	0.4	2.7	0.4
	QL1431	Gneiss	41	86	10	40	7.5	1.4	6.8	1	5.8	1.1	3.3	0.5	3.2	0.5
	QL1432	Gneiss	25	47	5.7	22	4.4	1.3	4.6	0.8	4.5	0.9	2.8	0.4	2.8	0.5
	QL1433	Gneiss	38	74	8.6	33	6.1	1.2	5.9	0.9	4.8	0.9	2.6	0.4	2.3	0.4
	QL1434	Gneiss	24	41	4.5	16	2.7	0.8	2.7	0.4	2.5	0.5	1.6	0.2	1.7	0.3
	QL1438	Gneiss	39	81	9.6	37	7	1.4	6.5	1	6	1.2	3.5	0.5	3.4	0.5
	QL1443	Two-mica gneiss	37	75	8.9	34	7	1.2	7	1.1	6.2	1.1	3	0.4	2.7	0.4
	QL1444	Two-feldspar gneiss	44	89	11	40	7.8	1.5	7.6	1.2	6.4	1.2	3.2	0.4	2.8	0.4
	14LY-2	Migmatized felsic light color body	7.08	12.8	1.44	5.24	1.22	1.4	1.31	0.22	1.32	0.25	0.62	0.08	0.39	0.052	Luo, F.H., Chen, D.L., Gong, X.K., Tang, W.J., Hu, Y.H., Ren, Y.F., 2018. Multi-stages partial melting of North Qinling ultrahigh pressure metamorphic terrane during exhumation. Acta Petrologica Sinica 34, 3671-3689.
			3.44	5.39	0.51	1.75	0.4	1.21	0.44	0.082	0.61	0.14	0.43	0.063	0.37	0.054
			7.72	14.4	1.63	5.95	1.28	1.3	1.17	0.14	0.56	0.068	0.12	0.014	0.067	0.008
			1.31	2.33	0.24	0.87	0.22	0.34	0.28	0.056	0.36	0.07	0.18	0.023	0.11	0.014
	13LY-24	Garnet bearing dark enclave granitic veins	74.2	151	16.8	59.9	11.5	1.02	8.33	0.89	3.47	0.43	0.85	0.087	0.5	0.081
			78.8	162	18	64.3	12.5	1.08	8.99	0.98	4.04	0.52	1.06	0.11	0.64	0.1
			78	162	17.9	63.8	12.5	0.98	8.91	0.96	3.71	0.46	0.92	0.095	0.55	0.086
			73.7	152	16.8	60	11.8	1.22	8.5	0.95	3.8	0.48	0.97	0.1	0.6	0.091
	13LY-37-1	Plagioclase amphibolite	10.01	28	4.36	22	6.66	2.31	7.15	1.17	6.98	1.33	3.53	0.47	2.95	0.41	Gong, X.K., 2017. Material composition, age and metamorphism of Qinling group in Danfeng area. Northwestern University.
	13LY-37-2		10.7	29.1	4.48	22.3	6.56	2.28	6.97	1.14	6.79	1.31	3.41	0.47	2.91	0.4
	13LY-37-3		17.3	41.6	5.45	22.9	5.32	1.72	5.16	0.89	5.31	1.04	2.89	0.41	2.63	0.38
	13LY-37-4		18.4	43.5	5.62	23.5	5.56	1.74	5.68	0.93	5.67	1.11	3.06	0.43	2.77	0.4
	13LY-37-5		17.4	41.4	5.26	22	4.79	1.62	4.84	0.77	4.77	0.94	2.58	0.37	2.34	0.34
	13LY-37-6		11.2	33.9	5.22	24.7	6.92	2.14	6.02	0.95	5.87	1.18	3.31	0.48	3.16	0.46
	13LY-37-7		11.8	29.8	4.41	21.3	6.16	2.01	6.72	1.14	7.12	1.41	3.84	0.53	3.32	0.48
	13LY-37-8		11.4	29.3	4.36	21.2	6.22	2.01	6.73	1.14	7.06	1.4	3.8	0.52	3.3	0.48
	13DF-23-1	amphibole eclogite	10.4	24.4	3.45	15.9	4.08	1.47	4.18	0.69	4.27	0.85	2.36	0.33	2.09	0.3
	13DF-23-2		10.7	25	3.52	16.4	4.11	1.46	4.33	0.72	4.49	0.88	2.49	0.34	2.16	0.32
	13DF-23-3		10.1	24.1	3.44	16.2	4.16	1.47	4.36	0.72	4.52	0.9	2.52	0.35	2.21	0.33
	13DF-23-4		9.42	24	3.55	17.1	4.68	1.5	4.7	0.79	4.96	1	2.9	0.41	2.63	0.39
	13DF-23-5		8.73	21.7	3.16	15.3	4.25	1.36	4.24	0.72	4.7	0.96	2.77	0.4	2.52	0.37
	15LY-3-1	Dark enclaves in migmatite	39.4	80.7	8.96	34.9	6.79	1.37	6.24	0.93	5.37	1.13	3.5	0.54	3.63	0.54
	15LY-3-2		38.3	78.2	8.65	33.7	6.62	1.37	6.11	0.92	5.47	1.18	3.75	0.58	3.91	0.58
	15LY-3-3		40.5	82.3	9.21	36	7.03	1.43	6.46	0.97	5.8	1.25	3.94	0.62	4.16	0.63
	13LY-21-2		78.8	162	18	64.3	12.5	1.08	8.99	0.98	4.04	0.85	1.06	0.11	0.64	0.1
	QL0715–2	Amphibolite	13.31	30.87	3.55	15.56	3.62	1.2	4.45	0.67	4.86	1.08	3.11	0.44	2.78	0.42	Shi, Y., Yu, J., Santosh, M., 2013. Tectonic evolution of the Qinling orogenic belt, Central China: New evidence from geochemical, zircon U–Pb geochronology and Hf isotopes. Precambrian Research 231, 19-60.
	QL0715–4	Two-feldspar gneiss	35.88	69.9	7.94	30.72	5.95	1.38	5.79	0.86	6.05	1.35	3.95	0.6	3.93	0.61
	QL0738	Gneiss	43.59	107	10.78	40.33	7.67	1.46	7.05	1.01	6.84	1.47	4.28	0.62	3.95	0.61
	QL0752	Gneiss	43.21	83.93	9.17	32.65	5.25	1.08	4.16	0.56	3.62	0.77	2.22	0.32	2.04	0.32
	QL0754–1	Gneiss	48.06	109	11.21	41.5	7.5	1.5	6.92	1	6.99	1.59	4.61	0.68	4.41	0.66
	QL0903	Gneiss	23.48	60.72	5.46	20.8	4.29	0.87	4.22	0.57	3.67	0.81	2.18	0.35	2.09	0.36
	08HN31	片麻岩	45.78	93.26	11.36	42.81	7.72	1.34	6.98	1.05	6.27	1.33	3.69	0.57	3.83	0.59	Yang, L., Chen, F.K., Yang, Y.Z., Li, S.Q., Zhu, X.Y., 2010. Zircon U-Pb ages of the Qinling Group in Danfeng area: Recording Mesoproterozoic and Neoproterozoic magmatism and Early Paleozoic metamorphism in the North Qinling terrain. Acta Petrologica Sinica 26, 2589-1603.
	08HN62		18.25	36.78	4.55	16.71	3.31	0.69	3.06	0.56	3.63	0.8	2.22	0.34	2.23	0.34
	08HN77		49.34	101.6	11.79	46.84	8.38	1.41	7.61	1.25	6.79	1.36	3.46	0.49	2.91	0.46
	08HN79		79.34	149.7	17.97	68.79	12.34	1.51	10.92	1.63	9.12	1.88	5.09	0.8	5.15	0.81
	QL0752	Hornblende biotite monzogneiss	43.21	84	9.17	32.65	5.25	1.08	4.16	0.56	3.62	0.77	2.22	0.32	2.04	0.32
	QL0715-2	Biotite plagioclase gneiss	13.31	31	3.77	15.56	3.62	1.2	4.45	0.67	4.86	1.08	3.11	0.44	2.78	0.42
	YLG0807	Biotite plagioclase gneiss	3.16	64.8	7.52	28.7	6.32	1.4	5.72	0.83	4.59	0.9	2.39	0.35	2.25	0.33	Liu, B.X., 2014. Magmatism and crustal evolution in the eastern part of the North Qinling terrane, China University of science and technology,
	YLG0812	Plagioclase amphibolite	6.58	16	2.55	12.4	3.77	1.3	4.1	0.68	4.25	0.88	2.55	0.38	2.5	0.38
	YLG0813	Plagioclase amphibolite	4.18	9.55	1.55	7.86	2.59	0.97	2.96	0.5	3	0.6	1.7	0.26	1.66	0.24
	0714-1		21.24	50.69	6.14	26.88	6.56	2.06	7.46	1.03	6.6	1.44	3.77	0.57	3.4	0.54
	904		27.85	54.63	5.98	24.42	4.87	1.56	5.03	0.68	4.49	0.99	2.84	0.44	2.62	0.45
	027NB-3	amphibolite	15.8	38.9	5.27	23.8	5.95	1.97	6.08	0.98	5.84	1.13	3.1	0.43	2.59	0.37	Dong, Y., Yang, Z., Liu, X., Zhang, X., He, D., Li, W., Zhang, F., Sun, S., Zhang, H. & Zhang, G., 2014. Neoproterozoic amalgamation of the Northern Qinling terrain to the North China Craton: Constraints from geochronology and geochemistry of the Kuanping ophiolite. Precambrian Research, 255, 77-95.
	027NB-4		16.1	39.3	5.31	24	5.99	2	6.13	0.99	5.87	1.16	3.17	0.44	2.69	0.38
	027NB-5		15.8	38.8	5.22	23.7	5.95	1.92	6.03	0.98	5.72	1.13	3.06	0.42	2.56	0.36
	027NB-6		18.1	44.8	6.08	27.6	6.87	2.19	6.96	1.14	6.66	1.31	3.55	0.49	2.98	0.43
	027NB-7		17	41.3	5.68	25.5	6.33	2.09	6.44	1.05	6.17	1.2	3.28	0.45	2.79	0.4
	027NB-8		18.5	45.7	6.15	27.6	6.86	2.21	6.94	1.12	6.6	1.3	3.54	0.49	2.96	0.43
	027NB-8R		18.6	45.7	6.16	27.8	6.91	2.22	6.98	1.14	6.7	1.31	3.56	0.49	3	0.43
	027N-10		10.28	25.2	3.91	18.6	5.15	1.73	5.67	0.96	5.67	1.19	2.99	0.45	2.91	0.45
	027N-13		9.69	24	3.72	17.6	4.86	1.63	5.17	0.88	5.2	1.08	2.68	0.41	2.66	0.4
	027N-17		12.14	27.7	3.94	17.6	4.46	1.45	4.87	0.79	4.61	0.96	2.41	0.37	2.42	0.37
	027N-19		16.4	37.6	5.35	24.1	5.89	1.92	6.31	1	5.75	1.16	2.92	0.43	2.79	0.42
	027N-23		13.35	31.3	4.62	21.4	5.78	1.8	6.35	1.09	6.43	1.39	3.6	0.54	3.57	0.55
	027NB-10		2.65	7.4	1.21	6.31	2.08	0.82	2.56	0.48	3.18	0.69	1.98	0.29	1.83	0.28
	027NB-11	greenschist	2.63	7.25	1.19	6.3	2.09	0.82	2.53	0.48	3.11	0.67	1.96	0.28	1.81	0.27
	027NB-12		2.84	7.76	1.28	6.66	2.15	0.85	2.66	0.5	3.31	0.71	2.04	0.3	1.91	0.28
	027NB-13		4.57	12.5	2.03	10.6	3.39	1.24	4.09	0.76	4.99	1.08	3.14	0.46	2.96	0.43
	027NB-14		3.05	8.22	1.33	7.05	2.24	0.9	2.74	0.52	3.43	0.74	2.13	0.3	1.97	0.29
	027NB-15		4.02	10.8	1.72	8.93	2.81	1.04	3.42	0.64	4.2	0.89	2.58	0.37	2.43	0.36
	027NB-16		4.66	12.8	2.06	10.7	3.36	1.16	4.01	0.75	4.86	1.04	3.03	0.44	2.86	0.42
	027N-27		3.69	9.97	1.65	8.5	2.7	0.97	3.26	0.61	3.84	0.88	2.35	0.37	2.45	0.38
	027N-28		3.11	8.27	1.37	7.25	2.32	0.83	2.8	0.53	3.32	0.77	2.06	0.32	2.12	0.34
	027N-29		3.06	8.08	1.37	7.13	2.34	0.82	2.85	0.54	3.45	0.8	2.07	0.34	2.23	0.34
	027N-162		2.91	8.11	1.38	7.19	2.3	0.84	2.73	0.54	3.41	0.77	1.99	0.33	2.18	0.36
	027N-164		3.05	8.17	1.38	7.14	2.3	0.8	2.75	0.54	3.45	0.77	1.98	0.33	2.13	0.35
	027N-165		3.3	8.88	1.48	7.55	2.36	0.84	2.77	0.54	3.41	0.77	2.02	0.33	2.14	0.35
	027N-168		4.21	11.42	1.91	9.79	3.04	1.09	3.6	0.7	4.53	1.02	2.61	0.43	2.83	0.47
	027N-169		3.49	9.57	1.62	8.44	2.67	0.91	3.12	0.61	3.92	0.88	2.27	0.37	2.48	0.41
	027N-170		2.69	7.44	1.26	6.53	2.1	0.78	2.45	0.48	3.07	0.69	1.78	0.29	1.97	0.32
	027N-170R		2.68	7.47	1.27	6.58	2.08	0.76	2.49	0.48	3.12	0.7	1.8	0.3	1.98	0.33
	027N-173		3.38	9.01	1.51	7.91	2.46	0.89	2.95	0.56	3.59	0.81	2.08	0.34	2.28	0.37
	027N-434		4.15	11.11	1.84	9.44	2.92	1.04	3.44	0.64	4.09	0.91	2.33	0.38	2.53	0.42
	027N-437		3.97	10.9	1.82	9.22	2.85	1	3.33	0.65	4.07	0.91	2.33	0.38	2.45	0.4
	027N-438		3.84	10.45	1.72	8.86	2.8	1	3.2	0.62	3.94	0.89	2.28	0.37	2.46	0.4
	027N-446		3.51	9.79	1.6	8.16	2.46	0.96	2.74	0.52	3.31	0.73	1.86	0.31	2.07	0.34
	Q85-113	Epidote albitite schist	3.25	10.18	1.51	7.31	2.37	1.03	3.26	0.68	3.65	0.74	2.09	0.3	1.95	0.32	Yan, Q.R., Wang, Z.Q., Yan, Z., Wang, T., Chen, J.L., Xiang, Z.J., Zhang, Z.Q., Jiang, C.F., 2008. Origin, age and tectonic implications of metamafic rocks in the Kuanping Group of the Qinling orogenic belt, China. Geological Bulletin of China 27, 1475- 1492
	Q85-105		3.28	9.93	1.38	6.61	2.11	0.91	2.78	0.47	3.15	0.58	1.87	0.27	1.78	0.25
	Q85-110		3.62	10.47	1.56	7.74	2.56	1.03	3.37	0.71	3.87	0.78	2.21	0.34	2.19	0.34
	Q85-123		4.14	12.51	1.7	8.84	2.82	1.26	4.03	0.81	4.56	0.88	2.62	0.49	2.46	0.4
	Q86-113		7.15	20	2.72	13.98	4.24	1.58	5.56	1.05	6.37	1.25	3.64	0.52	3.47	0.52
	Q86-10	Amphibolite	4.66	13.29	1.73	10.27	3.16	1.06	4.3	0.7	4.53	0.82	2.26	0.33	2.18	0.2
	Q86-103		3.01	8.91	1.2	7.06	2.24	0.82	3.63	0.55	3.92	0.73	2.19	0.33	2.23	0.38
	Q86-72		6.09	17.85	2.21	13.2	3.98	1.36	5.42	0.97	5.94	1.1	2.98	0.45	2.95	0.41
	Q86-137		2.34	6.84	1.01	5.21	1.77	0.75	2.63	0.52	3.06	1.61	1.75	0.28	1.68	0.35
	Q86-128		2.34	6.77	1.06	5.42	1.81	0.74	2.56	0.55	3.04	0.62	1.77	0.38	1.74	0.22
	Q86-138		4.19	12.05	1.68	8.84	2.77	1	3.62	0.73	4.15	0.8	2.26	0.35	2.15	0.3
	QD04-58	Epidote albitite schist	7.749	18.8	2.78	12.76	4.01	1.37	5.08	0.87	5.6	1.15	3.21	0.52	3.22	0.47
	KP-03		5.2	10.03	1.69	7.4	2.32	0.76	2.62	0.48	3.18	0.58	1.72	0.31	1.87	0.29
	KP-10		4.45	10.31	1.54	7.83	2.54	0.98	3.31	0.6	4.11	0.95	2.69	0.44	2.61	0.39
	KP-11		7.99	17.51	2.73	12.53	4.05	1.38	5.1	0.87	5.58	1.19	3.25	0.53	3.05	0.44
	GDP-3		5.67	12.46	1.86	9.66	2.89	1.4	3.62	0.63	4.17	0.79	2.36	0.41	2.51	0.37
	09LY-1	Greenschist	4	10	1.5	7.9	2.7	0.97	3.3	0.56	3.91	0.88	2.35	0.35	2.2	0.36	Diwu, C.R., Sun, Y., Liu, L., Zhang, C.L., Wang, H.L., 2010. The disintegration of Kuanping Group in North Qinling orogenic belts and Neo-proterozoic N-MORB. Acta Petrologica Sinica 26, 2025-2038.
	09LY-2		3	7	1.1	5.6	2	0.79	2.6	0.47	3.39	0.78	2.15	0.33	2.2	0.34
	09LY-3		4	9	1.5	7.7	2.6	0.96	3.2	0.56	3.9	0.86	2.34	0.35	2.2	0.34
	1	Epidote albite chlorite schis	3.9	9.99	1.77	8.65	2.48	1	3.17	0.54	3.38	0.73	2.1	0.33	1.92	0.26	Gao, H.X., Li, S.L., Chen, X.T., 1989. Petrochemistry and trace element characteristics of the Middle Proterozoic Kuanping group. Shaanxi Geology 4, 11-27.
	2	Epidote chlorite actinic albite schist	7.76	16.38	5.21	12.86	3.97	1.3	4.08	0.94	6.05	1.13	3.41	0.44	2.9	0.36
	3	Epidote albitite schist	4.89	13.21	2.04	10.92	3.21	1.15	3.7	0.64	4.06	0.87	2.43	0.36	2.15	0.25
	4		3.16	6.11	2.9	6	2.07	0.65	2.08	0.49	2.53	0.65	1.84	0.24	1.76	0.19
	5	Chlorite albite schist	6.74	13.83	3.06	9.43	3.1	1.12	3.56	0.74	3.66	1.05	2.81	0.39	3.23	0.33
	6		5.12	9.93	2.15	6.26	2.5	0.86	2.6	0.6	2.79	0.77	2.11	0.32	2.45	0.19
	7	actinolite schist	7.54	17.87	2.94	13.86	3.58	1.21	4.2	0.69	4.28	0.36	2.4	0.37	2.12	0.29
	8	Plagioclase amphibolite	2.49	6.54	1.02	5.83	1.73	0.7	2.17	0.38	2.48	0.52	1.5	0.23	1.33	0.19
	9		3.26	8.41	1.22	6.94	2.09	0.81	2.53	0.43	2.96	0.61	1.78	0.27	1.63	0.22
	10	Amphibolite schist	6.57	12.14	3.89	10.03	3.02	0.95	2.95	0.74	3.57	0.81	2.27	0.31	1.93	0.23
	11	Sericite quartz schist	31.39	61.7	7.43	25.83	4.81	0.9	4.13	0.66	3.47	0.74	2.1	0.35	2.14	0.31
	12	Biotite plagioclase quartz schist	34.37	65.27	8.31	30.84	6	1.09	5.14	0.86	5.12	1.1	3.29	0.54	3.21	0.42
	13	Biotite plagioclase quartz schist	34.71	68.65	8.6	30.9	6.14	1.13	4.98	0.81	4.3	0.92	2.62	0.47	2.83	0.42
	14	Biotite plagioclase schist	34.39	72.51	9.63	37.54	7.57	2.3	6.64	1.02	5.26	1.02	2.7	0.43	2.19	0.3
	0708-1	Metamorphic rock	35.22	88.9	7.15	27.12	4.99	0.83	4.64	0.52	2.77	0.51	1.46	0.25	1.62	0.32	Shi, Y., 2012. Formation and evolution of the East Qinling orogenic belt in Central China. Nanjing University.
	0708-2		38.78	74.77	8.26	31.05	5.78	1.12	5.15	0.71	4.67	1.04	3.14	0.5	3.31	0.53
	710		17.8	43.81	3.69	13.94	2.85	0.57	2.79	0.34	2.13	0.45	1.15	0.19	1.14	0.18
	709		49.72	98	9.96	34.87	6.56	1.18	5.99	0.78	4.84	1.04	2.66	0.41	2.36	0.39
Erlangping Group	Q1-1	Light grey rock bodies	18.4	38.2	4.75	21	4.87	1.56	5.71	0.82	6.21	1.39	4.35	0.7	4.7.	0.75	Yang, S.J., Chen, D.L., Gong, X.K., Zhao, J., 2015. The geochemistry， chronology and its geological implications of leucosomes in the basic volcanics of Erlangping Group in eastern segment of the North Qinling. Acta Petrologica Sinica 31, 2009-2022.
	Q1-2		27.9	59	7.02	29.5	6.11	1.63	6.44	0.99	6.29	1.34	4.12	0.64	4.29	0.67
	Q1-3		19.7	48.2	6.44	31.9	8.12	2.25	9.38	1.51	9.82	2.1	6.21	0.92	5.9	0.9
	Q1-4		27.8	53.8	6.21	26.3	5.13	1.67	5.33	0.81	5.09	1.08	3.23	0.48	3.13	0.48
	Q1-5		35.8	69.9	8.08	32.8	6.03	1.75	5.96	0.89	5.49	1.16	3.55	0.53	3.52	0.56
	Q19-1		35.2	67.4	8.21	32.9	6.69	1.83	6.54	0.99	6.37	1.46	3.95	0.6	4.02	0.61
	Q19-2		35.3	68.4	8.5	35.4	7.67	2.18	7.6	1.18	7.5	1.72	4.58	0.7	4.6	0.71
	Q19-3		33	66.1	8.5	36	8.29	2.27	8.31	1.31	8.44	1.94	5.23	0.79	5.19	0.78
	Q19-4		35.4	72.4	9.43	41.5	9.66	2.59	9.77	1.53	9.82	2.24	5.93	0.89	5.78	0.87
	Q19-5		33.8	65.8	7.98	32.4	6.67	1.8	6.55	1	6.37	1.48	3.99	0.61	4.09	0.64
	Q20-1		25.8	52.9	6.62	27.6	5.97	1.7	5.93	0.95	6.21	1.45	4.02	0.64	4.39	0.7
	Q20-2		19.6	41.6	5.35	22.9	5.22	1.63	5.1	0.81	5.25	1.23	3.41	0.54	3.68	0.58
	Q20-3		18.7	38.6	4.94	21	4.81	1.66	4.76	0.76	4.96	1.15	3.18	0.49	3.38	0.54
	Q20-4		18.7	38.2	4.89	20.9	4.74	1.74	4.68	0.73	4.75	1.11	3.12	0.49	3.42	0.55
	Q20-5		17.8	37.6	4.89	21.2	4.92	1.73	5.01	0.8	5.35	1.27	3.53	0.57	3.96	0.63
	Q4-1	Gray white rock mass	35.4	74.7	9.09	36.8	7.77	1.58	8.38	1.3	8.45	1.83	5.66	0.88	5.93	0.93
	Q4-2		34.8	72.1	8.89	36.3	7.6	1.63	8.18	1.27	8.16	1.76	5.4	0.83	5.63	0.89
	Q4-3		35.2	74.6	9.01	37.3	7.85	1.61	8.48	1.32	8.48	1.84	5.69	0.88	6	0.94
	Q4-4		32.5	69.2	8.36	34.5	7.36	1.52	7.96	1.24	7.96	1.73	5.36	0.83	5.6	0.88
	Q17-1		34.9	71.5	9.15	38.2	8.39	2.11	8.14	1.28	8.37	1.96	5.41	0.84	5.7	0.89
	Q17-3		35.5	72.4	9.3	38.7	8.57	2.16	8.22	1.31	8.55	1.97	5.46	0.86	5.82	0.9
	Q18-1		36.2	73.2	9.23	37.5	8.31	1.65	7.89	1.28	8.38	1.97	5.5	0.87	6.01	0.93
	Q18-2		36.8	75.3	9.47	38.4	8.31	1.65	8.05	1.31	8.71	2.02	5.72	0.92	6.19	0.96
	Q18-3		36.9	75.4	9.46	38.1	8.29	1.6	7.99	1.3	8.46	1.99	5.52	0.88	5.96	0.94
	Q16-1	Basic volcanic rocks	20.6	40.5	5.04	20.8	4.31	1.15	3.9	0.56	3.48	0.77	2.05	0.31	2.04	0.31
	Q16-2		17.4	35.3	4.42	18.5	3.75	1.04	3.46	0.5	3.1	0.68	1.8	0.27	1.75	0.27
	Q16-3		15.7	33.2	4.21	17.6	3.66	1.02	3.34	0.48	2.96	0.65	1.75	0.26	1.7	0.26
	Q16-4		19.7	39	4.89	20.4	4.2	1.19	3.81	0.55	3.43	0.75	2.03	0.3	2.01	0.31
	Q16-5		18.3	36.1	4.42	18.3	3.74	1.01	3.38	0.49	3	0.67	1.75	0.26	1.73	0.27
	SZP-003	Chert	28	52.4	5.09	20.4	4.1	1.08	4.21	0.66	4.94	0.96	3.16	0.5	3.05	0.42	Yan, C.H., Peng, Y., Liu, G.Y., Feng, S.B., Zhao, R.J., 2007. Geochemical characteristics of hydrothermal sedimentary cherts in the Erlangping Group, East Qinling Range, China. Geological Bulletin of China 26, 560- 566.
	SZP-004		26.2	52.2	4.19	20.2	4.75	0.89	3.69	0.65	3.87	0.77	2.28	0.34	2.32	0.28
	SDL-1		46.7	74.8	8.26	33.8	6.84	1.53	6.56	1.12	7.85	1.57	4.99	0.75	5.49	0.7
	SDL-3		27.2	50	5.62	25.8	6.14	1.65	6.5	0.99	6.73	1.32	4.17	0.59	4.17	0.57
	DH-2		6.93	12.2	1.72	6.93	1.89	0.55	1.65	0.28	1.99	0.3	1	0.12	1.1	0.29
	DH-8		4.91	9.3	0.97	4.32	0.73	0.18	0.76	0.11	0.78	0.11	0.48	0.068	0.4	0.064
	LDP-2		4.81	7.45	0.83	4.12	1.61	0.28	1.16	0.17	1.13	0.27	0.69	0.08	0.77	0.1
	DH-1	baritic rock	3.22	3.66	0.3	1.1	0.22	0.38	0.28	0.046	0.3	0.037	0.14	0.011	0.11	0.02	Feng, S.B., Xing, K., Zhou, H.R., Yan, C.H., Peng, Y., Zhao, J.M., Hu, S.B., Ren, J.G., 2007. Geochemical characteristics of hydrothermal sediments for baritic rocks of Erlangping Group in northern Qinling Mountains and their significance for mineralization. Global Geology 26, 199-207.
	DHD-1		23.2	44.4	4.64	16.4	2.86	1.09	2.17	0.45	2.42	0.43	1.45	0.22	1.47	0.25
	YZK-1		1.48	3.76	0.41	0.85	0.27	0.26	0.51	0.091	0.61	0.11	0.26	0.032	0.18	0.023
	LDP-1		0.92	1.29	0.18	0.93	0.32	0.12	0.49	0.072	0.51	0.12	0.45	0.037	0.14	0.057
	SZP-002		7.15	9.51	1.04	3.68	0.61	1.05	0.9	0.19	0.99	0.096	0.24	0.032	0.13	0.03
	SSA-1		5.5	6.33	0.42	1.32	0.37	0.17	0.29	0.094	0.55	0.059	0.099	0.011	0.041	0.011
	DH-8		4.91	9.3	0.97	4.32	0.37	0.18	0.76	0.11	0.78	0.11	0.48	0.068	0.4	0.064
	ELP-5		15	30	3.3	12	2.4	0.51	2.3	0.33	2	0.41	1.1	0.19	1.3	0.2
	ELP-4		13	25	3	11	2.3	0.58	2.2	0.36	2.3	0.51	1.4	0.26	1.6	0.26
	LY5		18	31	3.29	15.7	2.88	0.71	3.34	0.51	3.14	0.64	1.76	0.23	1.49	0.19
	LY7		18.1	39	3.19	14.7	2.78	0.51	2.56	0.4	2.32	0.48	1.33	0.21	1.14	0.16
	LY12		17.3	34	3.44	14.8	2.68	0.75	3.38	0.51	3.43	0.68	2.05	0.3	1.75	0.24
	QXE11-1	Pillow lava	16.61	39.45	4.7	8.1	3.64	1.04	3.17	0.44	2.71	0.54	1.52	0.23	1.47	0.22	Sun, W.D., Li, S.G., Sun, Y., Zhang, G.W., Zhang, Z.Q., 1996. Chronology and geochemistry of a lava pillow in the Erlangping Group ata Xixia in the North Qinling Mountains. Geological Review 42, 144-153.
	QXE11-2		17.88	36.64	4.91	17.93	3.68	1.03	3.05	0.45	2.73	0.54	1.49	0.23	1.37	0.2
	QXE11-3		18.24	40.01	5.08	18.75	3.82	1.04	3.16	0.47	2.85	0.56	1.59	0.25	1.52	0.23
	QXE11-4		16.6	38.25	5.12	18.28	3.72	1.08	3.21	0.47	2.78	0.57	1.64	0.25	1.63	0.23
	QXE11-5		18.85	40.4	5.17	19.4	3.91	1.08	3.39	0.5	3.06	0.6	1.71	0.26	1.63	0.24
	QXE11-6		20.79	45.82	6.36	24.16	5.08	1.45	4.36	0.65	4	0.78	2.28	0.34	2.19	0.32
	QXE11-31		17.74	38.48	5.11	18.45	3.66	1.01	3.17	0.48	2.87	0.58	1.65	0.25	1.54	0.23
	QXE11-32		18.15	41	5.15	18.28	3.73	1.01	3.27	0.5	2.91	0.58	1.64	0.26	1.58	0.24
	LSY-3	Felsic volcanic rocks	30.6	70.7	8.3	34.7	7.65	1.92	7.21	1.13	6.94	1.55	4.41	0.7	4.57	0.73	Xu. Y.H., Zhao, T.P., Zhao, W., 2009. Origin of felsic volcanic rocks associated with VMS-type deposits in the Er’langping Group, East Qinling: Implications for ore-forming setting. Acta Petrologica Sinica 25, 399-412.
	LSY-5		21.7	46.8	6.27	27.4	6.92	2.25	6.88	1.2	8.08	1.82	5.21	0.85	5.57	0.87
	LSY-15		46.4	87.1	11.9	48.9	10.1	2.3	8.78	1.27	7.2	1.33	3.85	0.6	4.06	0.69
	LSY-2		9.73	21	3.13	14.6	4.11	1.61	4.72	0.87	5.85	1.26	3.33	0.55	3.28	0.51
	LSY-4		10.1	20.9	2.99	14	3.98	1.86	4.18	0.74	5.22	1.15	3.03	0.47	2.81	0.43
	LSY-5		21.5	45.3	6.25	27.4	7.01	2.25	6.91	1.2	7.8	1.73	5.19	0.86	5.39	0.83
	LSY-7		26.9	56.4	7.83	32.6	8.31	2.34	7.87	1.37	9.42	1.99	5.97	0.94	6.06	1
	LSY-8		34	70	9.11	37.2	8.06	1.9	7.33	1.14	7.63	1.53	4.61	0.71	4.79	0.71
	LSY-9		44.8	101	13.7	53.4	12.8	3.87	12.4	2.23	15.6	3.44	9.52	1.57	9.65	1.52
	LSY-16		9.33	19.8	2.37	8.61	1.96	0.35	1.61	0.23	1.55	0.34	0.99	0.16	1.05	0.15
	SSP-10		14.1	30.2	3.9	15.9	3.89	1.03	3.82	0.61	4.03	0.87	2.66	0.43	2.85	0.46
	SDL-20		16.8	35	4.33	16.2	3.4	2.29	3.09	0.42	2.55	0.58	1.66	0.25	1.54	0.24
	SDL-29		29.9	63.6	8.23	31.3	7.37	1.45	7.34	1.19	7.93	1.76	4.98	0.83	5.38	0.85
	SSP-7		68.1	127	14.4	51.7	9.21	2.58	7.42	0.84	4.3	0.76	2.07	0.31	1.87	0.29
	SSP-11		25.8	44.7	4.53	15.4	2.76	0.7	2.66	0.39	2.39	0.53	1.63	0.28	1.87	0.29
	SDL-8		22.5	49.6	6.46	27	6.69	1.89	6.69	1.1	7.23	1.62	4.73	0.75	4.89	0.75
	SDL-10		10.5	22.4	3.16	12.9	3.55	1.25	3.76	0.66	4.6	1.06	3.16	0.49	3.31	0.52
	SDL-21		38.4	78.6	10.2	41.3	8.83	2.31	9	1.56	11.2	2.62	7.88	1.23	7.82	1.26
	SDL-25		32.6	68.2	8.58	35.2	7.53	1.65	7.3	1.11	7.2	1.53	4.75	0.78	5.37	0.88
	SDL-30		19.2	39.6	4.74	19.9	4.3	2.03	3.87	0.52	2.91	0.6	1.53	0.23	1.47	0.23
	SDL-38		18.9	43	5.75	25.6	6.42	1.7	6.67	1.18	8.23	1.88	5.59	0.94	6.04	0.96
	SZP-31		3.58	8.79	1.33	6.38	1.99	0.67	2.09	0.34	2.52	0.52	1.57	0.23	1.54	0.23
	SZP-32		20	36.9	4.1	14.6	2.71	0.61	2.56	0.37	2.25	0.51	1.42	0.24	1.75	0.29
	SZP-48		3.06	7.98	1.21	6.21	1.89	0.75	2.19	0.39	2.79	0.57	1.67	0.27	1.66	0.26
	SZP-27		16.2	30	3.49	12	2.6	0.82	2.7	0.43	2.74	0.6	1.73	0.3	1.94	0.29
	SZP-28		3.58	8.7	1.35	6.38	1.97	0.72	2	0.36	2.55	0.56	1.6	0.23	1.5	0.24
	SZP-41		16.8	30.9	3.49	12.5	2.49	0.64	2.44	0.35	2.34	0.54	1.64	0.28	2	0.33
	SZP-42		15.9	29.5	3.58	12.2	2.41	0.57	2.36	0.37	2.5	0.59	1.83	0.32	2.21	0.38
	SZP-43		11.2	21.1	2.6	9.22	1.8	0.35	1.64	0.25	1.52	0.34	1	0.15	1.07	0.18
	SZP-44		19.1	39.3	5.09	20.8	4.97	1.53	4.79	0.76	4.92	1.04	3.05	0.47	2.97	0.47
	SZP-45		6.56	16.7	2.59	11.7	3.09	0.87	3.04	0.52	3.28	0.73	2.09	0.33	2.22	0.33
	SZP-46		8.99	20.3	2.8	11.6	3.07	0.85	2.99	0.5	3.45	0.76	2.19	0.35	2.35	0.36
	SZP-47		3.52	8.53	1.31	6.54	1.86	0.68	1.95	0.34	2.4	0.54	1.43	0.24	1.49	0.24
Caotangou Group	D08-1	Rhyolite	20.44	40.1	4.36	16.28	3.29	0.74	3.04	0.49	2.62	0.52	1.45	0.23	1.44	0.2	Yan, Q.R., Wang, Z.Q., Chen, J.L., Yan, Z., Wang, T., Li, Q.G., Jiang, C.F., Zhang, Z.Q., 2007. Tectonic Setting and SHRIMP Age of Volcanic Rocks in the Xieyuguan nd Caotangou Groups :Implications for the North Qinling Orogenic Belt. Acta Geologica Sinica 81, 488-500.
	D 08-2	Dacite	49.05	100.87	10.66	40.08	7.35	1.7	7.95	1.23	6.6	1.36	3.78	0.55	3.52	0.54
	D 08-3	Basalt	8.98	20	2.78	12.83	3.49	1.2	3.95	0.7	4.47	0.93	2.59	0.39	2.58	0.39
	D10-1	Rhyolite	49.93	106.49	12.74	52.34	12.12	2.81	11.4	2.11	13.07	2.79	7.76	1.21	7.84	1.22
	D10-2		45.38	93.15	11.79	47.21	9.58	2.47	9.65	1.47	8.7	1.91	5.61	0.85	5.7	0.93
	D 10-3		36.68	75.94	9.75	39.65	8.59	2.43	8.65	1.38	8.11	1.75	5.01	0.78	5.09	0.8
	D 10-4		39.23	80.89	10.42	42.26	8.82	2.53	9.08	1.49	8.33	1.79	4.96	0.8	4.95	0.82
	1004 /2	Meta-andesite	19.5	28.5	5.6	17	4.5	1.3	5	0.82	4	0.83	2.65	0.6	2.15	0.2	Wang, D.Y., 2002. Comparison volcanic rock of the Caotangou Group ith that of the Danfeng Group and its analysis n structural circumstance. Northwestern Geology 35, 59-66.
	46753	Meta-dacite	8.2	14.9	4.2	10.5	3.1	1	6.4	1.3	3.8	0.83	1.6	0.27	1.98	0.98
	47119	Meta dacite porphyry	32	68	8.9	41	8	1.63	7.9	1	7	1.2	3.8	0.68	3.3	0.44
Jinning-Caledonian magmatic roc	YLG0810	granitic mylonite	29.2	60.6	6.82	25.6	5.47	0.71	5.37	0.85	4.78	0.85	2.29	0.32	2.06	0.3	Liu, B.X., 2014. Magmatism and crustal evolution in the eastern part of the North Qinling terrane, China University of Sence and Tchnology.
	T25		32	63.9	7.66	28.5	5.61	0.95	5.43	0.84	4.6	0.85	2.29	0.36	2.1	0.31
	FK11-38	Biotite monzogranite	33.4	72.2	7.98	30.5	6.87	0.99	6.25	1.07	6.28	1.23	3.39	0.5	3.38	0.51
	DQ14		38.2	81	9.7	36.2	7.11	1.17	6.88	1.06	6.1	1.29	3.58	0.55	3.38	0.54
	Q01-072		38.9	79	9.6	36.3	7.17	1.16	7.09	1.15	6.7	1.36	3.46	0.54	3.25	0.48
	FS0801	Meta-gabbro	11.8	30.44	4.65	22.84	6.64	2.2	6.99	1.2	7.69	1.55	4.08	0.58	3.52	0.52
	FS0802		59.51	122.8	15.73	62.15	11.2	2.74	7.67	0.9	4.17	0.73	1.73	0.24	1.45	0.2
	FS0803		109.09	196.5	24.01	93.86	15.86	4.88	10.88	1.29	5.65	0.98	2.42	0.32	1.96	0.29
	FS0804	Coarse grained diorite	127.1	223.98	24.3	88.62	13.95	3.12	9.88	1.07	4.8	0.85	2.12	0.3	1.87	0.29
	FS0805	Granodiorite	73.51	123.13	12.97	44.87	6.92	1.35	5.13	0.6	2.64	0.48	1.24	0.18	1.11	0.18
	FS0808	Diorite	108.84	184.23	20.99	74.66	11.91	3.72	8.05	0.85	3.44	0.59	1.53	0.21	1.3	0.19
	YLG0801	Granite	17.8	35.6	4.26	15.5	3.13	0.48	2.4	0.29	1.49	0.27	0.76	0.11	0.73	0.11
	YLG0802		15.6	33.4	3.79	13.8	2.74	0.5	2.06	0.24	1.2	0.21	0.58	0.09	0.56	0.08
	YLG0803		29.7	58.5	6.55	23.4	4.07	0.86	3.13	0.36	1.8	0.32	0.86	0.12	0.72	0.11
	YLG0816		22.4	47.8	5.03	18.2	3.34	0.79	2.88	0.37	2	0.37	1.08	0.15	0.95	0.14
	YLG0817		35.5	70.1	8.16	29.9	5.07	0.97	4.02	0.45	2.15	0.35	0.98	0.13	0.84	0.12
	YLG0818		31.8	60.3	7.04	26	4.31	0.9	3.51	0.38	1.88	0.31	0.89	0.12	0.78	0.12
	FK11-41		26.1	54.9	5.79	21.1	4.03	0.7	2.68	0.32	1.52	0.26	0.68	0.09	0.67	0.1
	FK11-42		32.8	68.8	7.17	26.3	4.76	0.73	3.14	0.39	1.81	0.29	0.75	0.09	0.64	0.1
	FK11-43		25.7	54.4	5.69	21.2	4.14	0.67	2.78	0.34	1.61	0.27	0.74	0.1	0.73	0.11
	FK11-45		20.6	46.2	4.72	17.6	3.45	0.51	2.3	0.29	1.36	0.24	0.64	0.09	0.64	0.1
	FK11-46		13.4	26.5	2.75	10.1	2.44	0.32	2.22	0.4	2.34	0.48	1.39	0.22	1.55	0.25
	FK11-47		33.7	64.6	6.29	22	3.81	0.95	2.71	0.31	1.51	0.25	0.65	0.08	0.57	0.09
	FK11-48		17.8	44.9	4.64	17.3	5.17	0.18	4	0.58	2.38	0.32	0.65	0.07	0.46	0.07
	QY-24		38.3	61.7	6.24	19.5	3.22	0.58	2.65	0.4	2.42	0.49	1.51	0.25	1.73	0.27
	QY-25		40.6	69.7	7.41	24.6	4.49	0.72	3.66	0.57	3.52	0.7	2.05	0.32	2.06	0.3
	QY-26		32.6	60.5	6.32	20.8	3.59	0.74	2.93	0.43	2.52	0.49	1.46	0.23	1.51	0.24
	QY-27		50.4	82.9	8.09	25.4	3.58	0.68	3.02	0.37	2.16	0.43	1.41	0.24	1.73	0.27
	QY-28		25.7	44.1	5.09	17.6	3.08	0.86	2.46	0.34	2.02	0.4	1.25	0.2	1.48	0.25
	QY-30		27.7	54.2	6.11	21.8	4.46	0.55	3.82	0.66	4.2	0.88	2.73	0.47	3.33	0.52
	08HN33		88.36	138.98	14.57	45.48	6.67	0.88	6.02	0.86	5.07	1.07	3.15	0.5	3.57	0.56
	YLG0809		26.1	48.3	5.49	20.3	3.67	1.34	2.84	0.3	1.3	0.2	0.52	0.07	0.45	0.07
	YLG0809		10.8	19.4	2.23	8.32	1.54	0.94	1.23	0.12	0.51	0.08	0.23	0.03	0.22	0.04
	08HN32	Diorite	22.8	36.1	4	13.2	2.5	0.9	2.3	0.3	2	0.5	1.3	0.2	1.5	0.3
	BSP11-12		15.3	36.6	4.96	22.8	5.24	1.37	4.32	0.67	3.89	0.77	2.15	0.31	2.11	0.31
	BSP11-13		23.4	48	5.45	22	4.03	1.03	2.79	0.34	1.76	0.31	0.85	0.11	0.8	0.12
	BSP11-15		13.4	26.8	3.21	13.8	3.01	1.1	2.49	0.38	2.08	0.4	1.13	0.16	1.13	0.17
	BSP11-16		18.3	37.5	4.47	18.9	3.98	1.23	3.25	0.46	2.51	0.48	1.33	0.19	1.32	0.21
	BSP11-17		20.4	40.8	4.91	20.4	4.14	1.23	3.54	0.46	2.5	0.48	1.31	0.19	1.26	0.2
	BSP11-18		25.5	51.4	6.19	25.6	5.05	1.53	4.33	0.56	3.05	0.58	1.58	0.23	1.51	0.23
	BSP11-19		22.7	45.9	5.39	22.4	4.63	1.4	3.8	0.54	2.97	0.57	1.53	0.22	1.47	0.22
	BSP11-20	Gabbro	18.9	38.9	4.56	18.8	3.73	1.09	2.94	0.42	2.2	0.41	1.12	0.16	1.07	0.16
	BSP11-21	Granite	35.6	57.9	5.86	19.1	3.03	0.68	2.4	0.32	1.75	0.34	1.03	0.16	1.26	0.21
	BSP11-22	Diorite	33.7	66.4	7.13	26.1	5.09	1.39	4.31	0.66	3.85	0.77	2.33	0.39	2.73	0.44
	FK11-21	Granite	35	65.5	6.21	21	3.2	0.63	2.42	0.29	1.39	0.23	0.61	0.08	0.51	0.08
	FK11-22		34.3	63.2	5.99	20.2	3.22	0.7	2.41	0.31	1.55	0.27	0.71	0.09	0.54	0.08
	FK11-23		20.6	39.8	3.71	12.9	2.07	0.54	1.53	0.19	0.89	0.15	0.4	0.05	0.37	0.06
	FK11-24		7.76	15.3	1.48	5.65	1.23	0.52	1.06	0.16	0.89	0.16	0.46	0.06	0.42	0.07
	FK11-25		23.3	45.1	3.97	13.7	2.12	0.52	1.63	0.2	1	0.18	0.49	0.07	0.48	0.07
	FK11-26		15.6	29.6	2.8	9.88	1.73	0.53	1.38	0.19	0.97	0.18	0.48	0.06	0.47	0.07
	FK11-28		11.5	22.7	2.08	7.41	1.33	0.4	1.04	0.14	0.71	0.13	0.36	0.05	0.35	0.06
	FK11-29	Diorite	10.2	20.7	1.88	6.76	1.2	0.41	0.96	0.13	0.63	0.11	0.31	0.04	0.3	0.04
	FK11-30	Granite	24.6	42.8	4.03	13.5	2.01	0.64	1.44	0.16	0.69	0.1	0.28	0.03	0.23	0.03
	FK11-31		29.8	57.6	5.11	17.4	2.58	0.64	1.95	0.23	1.09	0.2	0.53	0.07	0.52	0.08
	HCZ-01		3.69	6.49	0.71	2.4	0.47	0.34	0.39	0.05	0.33	0.1	0.37	0.09	0.8	0.14
	HCZ-02		24.4	44.9	4.16	13.2	2.01	0.53	1.6	0.17	0.73	0.13	0.33	0.05	0.33	0.05
	HCZ-03	Diorite	28.5	51.5	4.77	15	2.21	0.57	1.74	0.17	0.73	0.13	0.32	0.05	0.31	0.05
	HCZ-04	Granite	31.9	58.3	5.6	17.8	2.77	0.67	2.23	0.25	1.24	0.23	0.55	0.08	0.47	0.06
	HCZ-05		7.54	17.9	1.37	4.54	0.89	0.49	0.84	0.13	0.71	0.15	0.4	0.06	0.39	0.06
	08HN27		37.52	74.37	8.57	29.98	5.09	0.61	4.01	0.5	2.05	0.31	0.59	0.08	0.51	0.08
	08HN28		70.44	127.76	13.58	45.68	7.2	1.25	6.55	1.03	5.28	1	2.42	0.32	1.73	0.22
	ZP11-01		28.5	60.4	5.13	17.2	2.94	0.44	2.57	0.33	1.84	0.36	1.12	0.19	1.42	0.24
	ZP11-02		43.9	76	8.06	26.5	4.34	0.53	3.45	0.42	2.14	0.39	1.13	0.18	1.22	0.2
	ZP11-03		26	39.5	4.11	12.4	1.76	0.24	1.44	0.16	0.87	0.16	0.48	0.07	0.57	0.1
	ZP11-05		16.7	33.5	3.35	12.3	2.41	0.54	1.92	0.28	1.46	0.26	0.69	0.09	0.58	0.08
	ZP11-06		77.6	128	12.4	40.1	5.69	1.06	4.25	0.47	2.27	0.38	1.07	0.15	1.02	0.17
	ZP11-07		19.9	32.3	3.67	13.2	2.9	0.43	2.29	0.33	1.72	0.31	0.84	0.13	0.88	0.13
	ZP11-09		60.3	118	12	42.3	7.19	1.33	5.59	0.68	3.54	0.66	1.9	0.3	2.1	0.32
	ZP11-10		7.36	14.1	1.61	5.44	1.48	0.13	1.46	0.29	2.03	0.46	1.48	0.26	1.91	0.3
	ZP11-11		5.56	10.1	1.07	3.59	0.9	0.15	0.81	0.12	0.55	0.09	0.21	0.03	0.18	0.03
	ZY110-1		55.2	106	10.5	36	5.98	0.95	4.54	0.56	2.58	0.41	0.99	0.11	0.68	0.11
	LXP11-01		117	224	29.6	95.9	14.5	1.36	10.4	1.04	4.07	0.58	1.18	0.13	0.7	0.1
	LXP11-02		39.6	81.1	8.23	27.1	4.32	0.84	3.08	0.33	1.34	0.21	0.43	0.05	0.36	0.06
	HBC11-01		39.1	75.5	8	28.1	5.16	0.49	3.2	0.32	1.29	0.19	0.48	0.05	0.35	0.06
	HBC11-02		27.5	52.7	6.2	22.1	4.86	0.28	3.62	0.46	2.07	0.35	0.94	0.14	0.92	0.15
	AJP11-01		24.1	55.8	6.05	21.9	5.28	0.28	4.1	0.61	3.06	0.52	1.34	0.18	1.2	0.18
	YLG0824		15.3	29.2	3.04	10.4	2.29	0.8	2.37	0.44	3.03	0.68	2.19	0.37	2.68	0.4
	TP11-01		9.46	16.5	1.98	7.41	1.91	0.16	1.53	0.21	0.83	0.11	0.27	0.04	0.28	0.04
	TP11-02		4.9	5.95	0.79	2.77	0.69	0.18	0.71	0.16	1.08	0.24	0.66	0.09	0.62	0.09
	ZJZ12-01		6.75	14.9	2.14	9.33	2.47	0.75	2.38	0.43	2.93	0.66	2.08	0.35	2.44	0.4
	ZJZ12-02		6.92	16	2.24	9.89	2.66	0.7	2.6	0.48	3.18	0.71	2.17	0.36	2.41	0.38
	ZJZ12-03		6.99	17.8	2.35	10.5	2.87	0.7	2.82	0.52	3.55	0.79	2.43	0.41	2.82	0.45
	ZJZ12-04		5.92	15.1	2.31	12.2	4.95	1.18	5.98	1.28	9.15	2.1	6.15	0.96	6.05	0.92
	ZJZ12-05		14	32.7	4.76	22.8	6.71	1.27	6.84	1.27	8.63	1.92	5.73	0.92	6.03	0.91
	ZJZ12-06		6.54	15.7	2.16	9.47	2.59	0.76	2.54	0.46	3.04	0.67	2.04	0.33	2.2	0.35
	ZJZ12-07	Veins	5.72	12.9	1.97	9.27	3.22	0.59	3.71	0.78	5.46	1.21	3.67	0.6	3.98	0.62
	ZJZ12-08	Granite	3.92	11.1	1.68	8.69	2.9	0.91	2.99	0.58	3.91	0.85	2.51	0.39	2.53	0.39
	ZJZ12-09		10.6	22.7	3.83	18.4	5.48	1.47	5.48	1.04	6.98	1.55	4.61	0.74	4.95	0.77
	ZJZ12-10	Veins	10.5	25.9	3.63	16.7	4.68	1.26	4.34	0.78	5.11	1.09	3.2	0.51	3.31	0.52
	10QL151	Granite	2.61	53.8	5.94	21.9	4.08	0.76	2.93	0.35	1.8	0.32	0.89	0.13	0.82	0.11	Qin, Z.W., 2016. Early Paleozoic magmatism in the North Qinling orogenic belt and its implications for continental crustal evolution, China University of Geosciences.
	10QL152		30.1	62	6.89	24.8	4.59	0.84	3.29	0.4	2.01	0.34	0.92	0.13	0.86	0.13
	10QL153		29.5	61	6.76	24	4.79	0.8	3.23	0.41	1.95	0.33	0.91	0.13	0.83	0.12
	10QL154		26.8	55.2	6.18	21.9	4.34	0.78	3.01	0.38	1.85	0.34	0.9	0.13	0.84	0.11
	10QL155		32.4	63.2	6.56	21.1	2.76	0.68	1.76	0.2	0.93	0.17	0.47	0.07	0.41	0.07
	10QL156		29.8	61.3	6.83	24.8	4.48	0.8	3.18	0.39	1.91	0.34	0.92	0.13	0.84	0.12
	10QL157		27.9	57.2	6.23	22.6	4.35	0.81	3.04	0.38	1.85	0.31	0.85	0.12	0.78	0.11
	10QL158		30.4	63.1	6.88	24.7	4.44	0.83	3.18	0.4	1.83	0.29	0.76	0.1	0.68	0.1
	10QL93	Granite	27.6	48.4	4.71	15.6	2.13	0.69	1.57	0.18	0.79	0.13	0.37	0.05	0.33	0.05
	10QL96		15.2	26.7	2.75	9.78	1.66	0.57	1.42	0.18	1	0.17	0.5	0.07	0.47	0.07
	10QL97		18.5	31	3.17	11	1.7	0.65	1.28	0.15	0.74	0.13	0.38	0.05	0.3	0.05
	10QL104		33	59.4	6.11	20.6	2.92	0.79	2.06	0.25	1.14	0.19	0.5	0.07	0.46	0.07
	10QL121		19.8	35.8	3.86	13.7	2.34	0.58	1.96	0.27	1.4	0.25	0.65	0.08	0.59	0.08
	10QL124		17	30.5	3.33	11.5	2.02	0.64	1.72	0.24	1.36	0.24	0.69	0.09	0.53	0.08
	10QL125		16.7	30	3.25	11.5	2.04	0.58	1.75	0.24	1.33	0.22	0.6	0.08	0.48	0.06
	10QL128		35.1	62.6	6.09	20.2	3.03	0.79	2.2	0.28	1.38	0.24	0.71	0.1	0.66	0.1
	12QL35		10.1	14.3	1.97	6.98	1.4	0.45	1.36	0.2	0.96	0.17	0.48	0.06	0.4	0.06
	12QL37		16.9	22	3.18	10.3	1.62	0.46	1.31	0.18	0.76	0.14	0.42	0.05	0.33	0.05
	12QL39		18.9	26.3	3.2	10.3	1.63	0.51	1.37	0.17	0.7	0.12	0.37	0.05	0.31	0.04
	12QL40		19.1	26.4	3.32	10.6	1.73	0.51	1.5	0.18	0.74	0.13	0.38	0.05	0.32	0.05
	10QL12	Granite	34.7	70.5	7.47	26.6	5.02	0.64	3.97	0.59	3.1	0.55	1.58	0.23	1.49	0.22
	10QL13		47.8	90.5	9.63	33.2	5.96	0.75	4.82	0.65	3.28	0.59	1.59	0.21	1.31	0.19
	10QL14		41	79	8.34	29.3	5.26	0.73	4.24	0.62	3.21	0.59	1.68	0.24	1.52	0.21
	10QL15		34.3	68	7.21	25.1	4.42	0.75	3.38	0.46	2.39	0.42	1.22	0.16	1.08	0.17
	10QL16		45.6	86.4	8.85	30.9	4.95	0.86	3.52	0.42	1.99	0.35	0.98	0.14	1.02	0.16
	10QL18		48.3	91.2	9.64	33.7	5.93	0.75	4.59	0.59	2.95	0.5	1.25	0.17	1	0.14
	10QL19		52.7	101	10.9	38.6	7.24	0.71	5.75	0.82	4.32	0.77	2.12	0.3	1.77	0.25
	11QL67		53.6	105	12	44.5	7.82	1.1	5.82	0.77	3.74	0.6	1.45	0.22	1.34	0.24
Danfeng Group	QL07033	Gneiss	45.14	105	10.82	40.68	8.13	1.42	7.31	0.97	6.11	1.29	3.71	0.56	3.58	0.56	Shi, Y., Yu, J., Santosh, M., 2013. Tectonic evolution of the Qinling orogenic belt, Central China: New evidence from geochemical, zircon U–Pb geochronology and Hf isotopes. Precambrian Research 231, 19-60.
	11SHG-01	Garnet amphibolite	12.8	34.1	4.79	21.5	5.34	1.78	5.67	0.87	5.48	1.11	3.15	0.47	2.93	0.44	Diwu, C., Long, X., 2018. Tectonic evolution of the North Qinling Orogenic Belt, Central China: Insights from metamafic rocks of the Songshugou Complex. Geological Journal 54, 2382-2399.
	11SHG-011		14.1	36.5	5.29	24.9	7.22	2.73	9.46	1.62	10.7	2.15	5.63	0.74	4.28	0.61
	11SHG-011R		14.3	37.2	5.37	25.1	7.37	2.75	9.53	1.62	10.8	2.15	5.65	0.73	4.25	0.61
	11SHG-021	Amphibolite	13.8	33.9	5.07	24.3	6.57	2.2	7.54	1.21	7.61	1.54	4.32	0.62	3.88	0.59
	11SHG-117-1		8.53	20.4	3.03	14.4	3.89	1.39	4.53	0.73	4.64	0.95	2.64	0.37	2.33	0.35
	11SHG-117-2		5.93	15.3	2.42	12.6	3.91	1.35	5.09	0.87	5.88	1.24	3.61	0.53	3.38	0.51
	11SHG-121		9.75	24.6	3.66	17.5	4.73	1.61	5.51	0.89	5.57	1.14	3.13	0.44	2.79	0.41
	12XG02	HP mafic rocks	8.28	20.4	3.19	17.8	5.51	1.81	5.93	0.92	5.63	1.12	3.16	0.45	2.95	0.43
	12XG11-1		9.97	25.1	3.62	16.5	4.13	1.35	4.61	0.73	4.88	1.02	2.9	0.42	2.68	0.4
	12XG11-1R		10	25.3	3.61	16.6	4.1	1.36	4.56	0.72	4.87	1.01	2.92	0.42	2.66	0.41
	12XG11-2		9.84	25.1	3.62	16.6	4.29	1.48	5.01	0.81	5.2	1.07	3.02	0.44	2.79	0.41
	12XG11-21		12.7	32.7	4.69	21.5	5.25	1.77	5.8	0.91	5.78	1.2	3.39	0.49	3.2	0.47
	SLP‐01	gabbro	24.46	46.9	6.11	23.03	4.49	1.67	5.51	0.83	4.44	0.91	2.58	0.41	2.23	0.39	Liu, J., Sun, Y., 2017. Petrogenesis of the Sanshilipu gabbro complex in the Shangdan Suture: New constraints on evolution of the Qinling Orogen. Geological Journal 52, 238-249.
	SLP‐02		43.04	94.27	12.4	57.25	10.74	4.02	12.69	1.77	8.81	1.77	4.58	0.67	3.53	0.59
	SLP‐03		35.57	79.86	11.05	52.64	10.43	3.27	11.8	1.75	9.36	1.92	5.28	0.77	4.34	0.72
	SLP‐04		16.53	29.81	3.84	14.98	2.97	1.37	3.76	0.56	3.06	0.64	1.76	0.27	1.48	0.27
	SLP‐05		58.57	111.2	11.96	44.5	6.44	3.56	7.4	0.79	3.58	0.69	1.91	0.27	1.58	0.28
	SLP‐06		32.66	74.63	10.17	48.06	9.55	3.37	11.34	1.61	8.82	1.74	4.78	0.66	3.77	0.61
	SLP‐07		46.63	89.2	10.49	41.66	6.75	2.15	8.08	1.02	5.37	1.08	3.01	0.44	2.61	0.46
	SLP‐08		18.53	43.51	6.67	27.35	5.13	1.71	5.74	0.78	4.24	0.85	2.33	0.34	1.84	0.32
	SLP‐09		46.47	87.38	10.1	40.64	6.71	2.09	7.96	1.03	5.61	1.12	3.21	0.46	2.8	0.47
	SLP‐10		30.6	59.63	7.83	30.42	5.34	1.91	6.26	0.84	4.74	1	2.92	0.46	2.79	0.47
	13QL-25	Garnet amphibolite	18.8	45.8	6.81	31.8	9.78	3.89	12.9	2.45	15.6	2.94	7.51	0.84	4.97	0.67	Tang, L., Santosh, M., Dong, Y., Tsunogae, T., Zhang, S., Cao, H., 2016. Early Paleozoic tectonic evolution of the North Qinling orogenic belt: Evidence from geochemistry, phase equilibrium modeling and geochronology of metamorphosed mafic rocks from the Songshugou ophiolite. Gondwana Research 30, 48-64.
	13QL-31	Amphibolite	18.9	47.2	6.89	32	8.64	2.87	11.7	2.26	14.9	3.12	8.98	1.16	7.68	1.11
	13QL-32	Plagioclase amphibolite	5.4	13.5	2.21	11.3	3.81	1.38	5.11	0.93	6.31	1.36	4.2	0.57	3.84	0.6
	G-2*	basalt	3.86	10.36	1.54	8.76	2.96	1.03	3.7	0.74	4.57	1.05	2.83	0.45	3.03	0.48
	G-3*	basalt	4.02	10.63	1.59	8.89	3	1.07	3.78	0.74	4.68	1.07	2.78	0.44	2.96	0.47	Li, Y., Yang, J., Dilek, Y., Zhang, J., Pei, X., Chen, S., Xu, X., Li, J., 2015. Crustal architecture of the Shangdan suture zone in the early Paleozoic Qinling orogenic belt, China: Record of subduction initiation and backarc basin development. Gondwana Research 27, 733-744.
	G-4*	basalt	3.99	10.79	1.6	9.05	3.01	1.09	3.81	0.76	4.68	1.08	2.82	0.44	3.02	0.47
	G-5*	basalt	3.8	10.66	1.61	9.12	3.05	1.03	3.88	0.77	4.93	1.12	2.95	0.46	3.2	0.5
	G-6*	basalt	3.97	10.71	1.59	9.03	3.1	0.97	3.88	0.77	4.83	1.11	2.92	0.46	3.15	0.49
	G-7*	basalt	3.82	10.52	1.56	8.81	2.95	1	3.84	0.76	4.87	1.13	2.97	0.47	3.15	0.5
	G-8*	basalt	3.68	9.16	1.49	8.35	2.81	0.9	3.61	0.7	4.35	0.99	2.6	0.4	2.73	0.42
	G-9*	basalt	3.51	10.06	1.49	8.55	2.87	1.06	3.65	0.73	4.53	1.05	2.81	0.45	3.07	0.48
	G-12*	basalt	2.51	6.27	0.95	5.61	2.1	0.72	2.83	0.61	4.03	0.98	2.69	0.45	3.13	0.51
	G-13*	basalt	2.44	6.24	0.94	5.61	2.08	0.73	2.82	0.59	4.01	0.98	2.69	0.44	3.09	0.49
	G-14*	basalt	2.35	6.08	0.92	5.41	2.06	0.76	2.8	0.62	4.15	1.02	2.82	0.49	3.25	0.54
	GZ-5+	basalt	5.17	11.2	1.76	9.45	2.95	1.24	3.74	0.74	4.78	1.06	3.06	0.46	2.99	0.43
	GZ-7+	basalt	2.52	6.27	0.95	5.28	1.9	0.63	2.4	0.52	3.6	0.85	2.33	0.39	2.71	0.44
	GZ-8+	basalt	2.39	6.14	0.94	5.2	1.87	0.65	2.35	0.52	3.59	0.85	2.32	0.39	2.73	0.44
	08y-972	basalt	2.63	7.47	1.23	6.56	2.24	1.03	3.21	0.56	3.9	0.85	2.58	0.4	2.59	0.39
	08y-973	basalt	2.14	5.88	0.98	5.45	2.19	1.12	3.22	0.56	3.67	0.8	2.42	0.37	2.53	0.37
	08y-974	basalt	3.16	9.07	1.6	9.04	3.32	1.15	4.3	0.8	5.33	1.19	3.6	0.54	3.58	0.52
	08y-975	basalt	7.42	18.1	2.61	11.9	3.68	1.31	4.04	0.77	4.47	0.93	2.74	0.41	2.68	0.37
	08y-978	basalt	7.41	17.4	2.57	12.2	3.76	1.41	4.64	0.81	5.15	1.03	3.02	0.44	2.87	0.44
	08y-979	basalt	7	17.4	2.45	11.4	3.49	1.39	4.47	0.74	4.98	1.08	2.91	0.46	2.82	0.39
	08y-980	basalt	7.14	18	2.59	12.6	3.83	1.44	4.38	0.81	4.97	1.08	3.12	0.47	3.14	0.41
	08y-982	basalt	9.2	21.4	3	13.5	3.75	1.33	4.25	0.75	5.06	1.07	3.02	0.43	2.69	0.38
	08y-997	basalt	7.98	19	2.72	13.1	4.04	1.36	4.73	0.76	4.99	1.07	3.15	0.43	2.87	0.4
	08Y-1010	basalt	6.26	16.6	2.54	13.1	4.32	1.4	6.36	1.06	7.33	1.54	4.6	0.66	4.37	0.63
	08Y-1023	basalt	2.61	7.69	1.31	7.28	2.59	0.98	3.92	0.69	4.74	1.02	2.97	0.43	2.87	0.43
	027N-137*	basalt	4.43	12.75	2.2	11.39	3.56	1.3	4.13	0.81	4.96	1.11	2.85	0.47	2.98	0.5
	027N-139*	basalt	5.27	15.48	2.76	14.56	4.69	1.63	5.43	1.07	6.76	1.51	3.88	0.63	4.12	0.68
	027N-142*	basalt	19.98	39.06	4.95	19.41	4.03	1.11	3.92	0.59	3.26	0.66	1.71	0.27	1.74	0.3
	027N-152*	basalt	4.88	14.28	2.5	13.16	4.26	1.45	5.05	0.98	6.24	1.39	3.57	0.6	3.74	0.63
	08y-1106	basalt	4.47	10.5	1.59	7.66	2.53	0.92	3.11	0.56	3.65	0.76	2.24	0.32	2.27	0.34
	08y-1108	basalt	2.84	8.28	1.35	6.82	2.41	1.05	3.24	0.62	4.17	0.9	2.62	0.4	2.54	0.37
	08y-1109	basalt	4.85	14	2.29	11.3	3.98	1.47	4.73	0.88	5.41	1.22	3.41	0.53	3.47	0.49
	08y-1112	basalt	3.21	9.68	1.64	8.37	2.87	1.23	3.84	0.7	4.56	1	2.83	0.43	2.74	0.38
	08y-1113	basalt	3.33	10.5	1.77	9.45	3.11	1.27	4.15	0.78	4.74	1.09	3.15	0.46	2.89	0.44
	08y-1124	basalt	4.03	11.4	1.83	9.72	3.12	1.18	4.01	0.66	4.42	0.97	2.79	0.39	2.65	0.4
	027N-236*	basalt	2.42	7.32	1.41	8.22	3.09	1.05	3.83	0.79	5.25	1.21	3.19	0.53	3.6	0.59
	027N-248*	basalt	3.03	8.3	1.43	7.4	2.42	0.89	2.94	0.57	3.76	0.86	2.26	0.37	2.48	0.41
	027N-250*	basalt	2.89	8.15	1.4	7.42	2.43	0.9	2.94	0.58	3.83	0.87	2.28	0.37	2.53	0.42
	08y-1005	basalt	1.16	3.23	0.56	2.88	1.13	0.62	1.41	0.26	1.75	0.38	1.17	0.17	1.14	0.16
	08y-1013	basalt	4	8.77	1.15	5.09	1.47	0.48	1.79	0.28	2.03	0.46	1.45	0.21	1.51	0.24
	08y-1014	basalt	3.77	8.41	1.09	5.06	1.36	0.49	1.84	0.28	1.98	0.46	1.47	0.22	1.48	0.24
	08y-1015	basalt	3.73	8.24	1.12	5.08	1.39	0.47	1.79	0.27	1.87	0.42	1.33	0.19	1.32	0.21
	08y-1016	basalt	3.18	8.03	0.99	4.61	1.31	0.43	1.66	0.26	1.88	0.42	1.33	0.19	1.36	0.21
	08y-1017	basalt	3.22	7.57	1.05	4.81	1.34	0.47	1.65	0.27	1.87	0.41	1.3	0.21	1.39	0.21
	08y-1027	dolerite	1.99	3.67	0.54	2.54	0.73	0.23	0.98	0.18	1.24	0.26	0.77	0.12	0.78	0.11
	08y-1031	dolerite	0.41	0.94	0.13	0.65	0.23	0.14	0.42	0.06	0.46	0.11	0.33	0.05	0.28	0.05
	08y-1042	dolerite	0.82	2.06	0.33	1.88	0.72	0.35	1.09	0.19	1.33	0.28	0.86	0.12	0.77	0.11
	09y-819	basalt	1.38	3.44	0.54	2.64	0.94	0.33	1.39	0.24	1.68	0.38	1.1	0.16	1.12	0.18
	09y-821	basalt	1.56	3.93	0.6	3.25	1.08	0.47	1.53	0.28	2.01	0.45	1.37	0.2	1.32	0.2
	09y-822	basalt	1.22	3.07	0.46	2.47	0.91	0.32	1.36	0.24	1.65	0.38	1.08	0.16	1.06	0.16
	09y-823	basalt	1.15	2.8	0.43	2.05	0.76	0.26	1	0.18	1.3	0.29	0.86	0.13	0.86	0.13
	Hd-1*	basalt	19.67	36.9	4.99	21.01	4.49	1.39	3.8	0.59	3.23	0.69	1.65	0.24	1.72	0.27
	Hd-2*	basalt	17.5	33.13	4.32	18.57	4.02	1.23	3.34	0.49	2.68	0.55	1.31	0.19	1.38	0.21
	Hd-3*	basalt	15.82	30.17	3.99	17.26	3.77	1.16	3.14	0.46	2.51	0.52	1.23	0.18	1.27	0.2
	Hd-4*	basalt	14.9	29.46	3.92	17.2	3.83	1.17	3.16	0.47	2.56	0.53	1.25	0.19	1.31	0.2
	Hd-5*	basalt	28.29	54.32	7.37	31.07	6.53	2	5.42	0.82	4.49	0.95	2.26	0.34	2.45	0.38
	Hd-6*	basalt	15.33	30.48	4.2	18.64	4.21	1.28	3.41	0.52	2.81	0.58	1.37	0.2	1.4	0.22
	Hd-7*	basalt	22.61	39.77	5.46	22.69	4.72	1.45	3.95	0.6	3.33	0.71	1.72	0.26	1.84	0.28
	Hd-9*	basalt	15.81	30.58	4.21	18.5	4.11	1.26	3.41	0.51	2.77	0.57	1.37	0.2	1.41	0.22
	08y-1087	basalt	32.6	64.3	7.26	28.9	5.6	1.47	5.21	0.74	3.93	0.78	2.18	0.32	2.01	0.29
	09y-826	basalt	6.26	13.6	1.98	9.14	2.56	0.84	3.38	0.54	3.72	0.84	2.5	0.34	2.29	0.35
	09y-827	basalt	21	39.4	4.94	18.8	3.9	1.07	3.88	0.49	2.8	0.56	1.59	0.21	1.46	0.22
	09y-828	basalt	11.9	22.6	2.82	11.3	2.54	0.85	3.01	0.47	3.07	0.67	2.03	0.28	1.91	0.29
	09y-829	basalt	7.51	14.1	1.83	8.18	1.93	0.71	2.36	0.36	2.41	0.53	1.54	0.2	1.42	0.22
	09y-831	basalt	20.9	37.9	4.44	17.2	3.48	1.09	3.61	0.5	3.01	0.63	1.99	0.27	1.8	0.27
	07WG 1	Amphibolite	9.34	16.9	2.12	8.22	1.84	0.777	2.62	0.315	1.99	0.43	1.29	0.184	1.19	0.183	Yan, Z., Wang, Z.Q., Chen, J.L., Yan, Q.R., Wang, T., Zhang, Y.L., 2009. Geochemistry and SHRIMP Zircon U-Pb Dating of Amphibolites from the Danfeng Group in the Wuguan Area , North Qinling errane and their Tectonic Significance. Acta Geologica Sinica 83, 1633-1646.
	07WG 2		13	24.4	3.06	12.5	2.81	1.09	3.11	0.53	3.3	0.703	2.05	0.303	1.96	0.291
	07WG 3		15.8	29.4	3.72	15	3.41	1.18	3.73	0.57	3.5	0.776	2.18	0.315	1.96	0.294
	07WG 5		6.71	13	1.84	8.2	2.12	0.831	2.64	0.448	2.83	0.613	1.89	0.243	1.78	0.25
	07W G 6		19.8	32.3	4.13	15.3	3.01	0.95	3.14	0.482	2.81	0.627	1.85	0.251	1.8	0.259
	07WG 8		16.4	28.6	3.62	13.7	2.75	0.931	2.88	0.452	2.77	0.563	1.7	0.229	1.57	0.228
	07WG 10		15.5	26.3	3.42	12.6	2.63	0.879	2.74	0.444	2.51	0.532	1.7	0.214	1.53	0.224
	1442/ 1	Meta-basic volcanic rocks	36.3	62.2	7.06	29.6	5.58	1.83	4.74	0.75	4.85	1.05	3	0.45	2.71	0.42	Pei, X.Z., Li, H.M., Li, G.G., 2001. A Study of Formation Epoch and Tectonic Attribute of the Danfeng Group Complex in East Qinling Mountains. Acta Petrologica et Mineralogica 20, 180-188.
	1442/ 3		18.6	36.3	4.56	20.2	4.74	1.44	4.58	0.8	4.97	1.1	3.2	0.42	2.46	0.4
	1442/ 4		18.7	36.3	4.54	20.9	5.19	1.82	5.49	1	6.08	1.43	4.17	0.5	3.07	0.47
	1502/ 2		15.5	33.5	4.07	17.4	3.62	1.18	3.05	0.53	3.34	0.74	2.03	0.26	1.53	0.26
	1502/ 4		7.14	10.8	1.49	7.75	1.99	0.88	1.69	0.28	1.79	0.39	1.14	0.17	1.02	0.16
	3880/5		2.25	5.04	0.69	3.5	1.04	0.52	1.5	0.3	2.27	0.52	1.56	0.23	1.31	0.12
	3910/4		7.59	18.7	2.48	13.8	3.43	1.33	4.15	0.76	6.8	1.23	3.66	0.46	2.46	0.34
	DL079-6	Gabbro	22.5	43.4	4.92	18.7	3.4	1.39	2.92	0.36	1.99	0.38	1.05	0.15	0.91	0.14	Xu, S.Z., 2017. Geochronology and geochemistry of gabbros in the eastern Shangdan structural belt. Northwestern University.
	DL079-8		15.1	29.9	3.54	14	2.75	0.97	2.52	0.36	2.1	0.42	1.19	0.17	1.08	0.16
	DL079-9		15.4	29.2	3.5	13.8	2.69	0.97	2.52	0.37	2.13	0.42	1.17	0.17	1.13	0.17
	DL079-10		12.5	23.9	2.91	11.5	2.27	0.82	2.11	0.31	1.77	0.36	0.99	0.14	0.91	0.14
	GC01-1		28.2	54.3	6.19	23	4.2	1.24	3.77	0.53	3.1	0.63	1.79	0.26	1.74	0.25
	GC01-3		24.7	50	5.87	22.4	4.13	1.21	3.64	0.51	2.92	0.57	1.62	0.23	1.47	0.22
	GC01-4		16.5	34.1	4.05	15.7	3.04	0.97	2.72	0.38	2.23	0.45	1.27	0.19	1.16	0.18
	GC01-5		28.4	54.6	6.21	23.1	4.22	1.26	3.77	0.54	3.16	0.63	1.84	0.27	1.74	0.27

## Sheet: S3
Group	sample number	lithotype	La	Ce	Pr	Nd	Sm	Eu	Gd	Tb	Dy	Ho	Er	Tm	Yb	Lu	Reference
Douling Group	QL0724–1	Amphibolite	8.11	17.25	2.31	10.61	2.82	1.02	3.56	0.53	3.89	0.91	2.52	0.35	2.3	0.36	Shi, Y., Yu, J., Santosh, M., 2013. Tectonic evolution of the Qinling orogenic belt, Central China: New evidence from geochemical, zircon U–Pb geochronology and Hf isotopes. Precambrian Research 231, 19-60.
	QL0724–2	Gneiss	23.33	37.16	3.51	12.68	1.87	1.19	1.55	0.19	1.12	0.24	0.63	0.09	0.51	0.08
	QL0728–1	Amphibolite	17.22	37.23	4.09	16.96	3.62	1.18	3.59	0.51	3.41	0.78	2.18	0.32	2.1	0.32
	QL0729	Two-feldspar gneiss	24.77	43.67	4.56	18.66	3.26	0.99	3.15	0.39	2.37	0.48	1.32	0.21	1.3	0.22
	DLP-21-1		11.63	24.13	2.67	10.12	2.22	0.72	2.16	0.38	2.33	0.48	1.41	0.22	1.49	0.22	Wang, R., Xu, Z., Santosh, M., 2019. Neoproterozoic magmatism in the northern margin of the Yangtze Block, China: Implications for slab rollback in a subduction-related setting. Precambrian Research 327, 176-195.
	DLP-21-2		13.44	29.24	3.78	14.95	2.96	0.88	2.91	0.48	2.75	0.54	1.66	0.23	1.63	0.26
	DLP-25-1	diorite	14.05	29.83	3.65	14.32	3.14	0.96	3.03	0.54	3.02	0.66	1.75	0.3	1.8	0.29
	DLP-25-2		12.97	30.33	3.83	16.18	3.72	1.08	3.77	0.62	3.83	0.76	2.22	0.32	2.12	0.31
	DLP-25-3		14.27	31.79	3.76	15.37	3.32	0.98	3.21	0.54	3.3	0.65	1.96	0.28	1.92	0.29
	DLP-28-1		34.14	59.79	6.01	20.28	3.47	0.73	2.77	0.5	2.99	0.61	1.89	0.29	2.14	0.34
	DLP-30-1	granodiorite	27.28	55.47	6.25	23.19	4.44	0.86	3.69	0.61	3.46	0.68	2	0.3	2.02	0.32
	DLP-30-2		23.69	49.45	5.7	21.28	4.07	0.88	3.49	0.57	3.36	0.68	2.01	0.3	1.96	0.3
	FHSP-2-1	gabbro	5.26	8.49	1.4	5.75	1.26	0.44	1.21	0.19	1.09	0.21	0.62	0.09	0.54	0.08
	FHSP-2-2		5.5	8.55	1.45	5.77	1.21	0.45	1.19	0.18	1.1	0.2	0.59	0.09	0.54	0.08
	FHSP-6-1	diorite	23.65	53.74	7.03	29.44	5.43	1.28	4.45	0.71	4.1	0.8	2.38	0.36	2.26	0.32
	FHSP-6-2		23.96	56.23	7.38	31.17	5.97	1.37	4.95	0.77	4.48	0.85	2.55	0.37	2.39	0.34
	FHSP-6-3		23.6	57.7	7.56	33.2	6.15	1.38	5.85	0.77	4.7	0.93	2.66	0.4	2.61	0.41
	FHSP-12-1	granite	32.13	66.02	7.45	26.93	4.83	0.69	3.76	0.65	3.99	0.81	2.51	0.4	2.73	0.41
	FHSP-12-2		32.28	66.99	7.59	27.7	5.08	0.69	3.77	0.68	4.08	0.82	2.53	0.39	2.7	0.41
	FHSP-13-1		35.37	73.69	8.9	35.55	7.04	1.55	5.91	0.96	5.81	1.15	3.53	0.53	3.55	0.54
	FHSP-14-1	diorite	24.74	52.43	6.37	25.82	5.06	1.28	4.35	0.7	3.98	0.79	2.35	0.33	2.34	0.34
	FHSP-14-2		24.82	53.63	6.43	25.9	5.21	1.32	4.33	0.7	4.14	0.81	2.41	0.34	2.32	0.34
	XH01	Biotite plagioclase gneiss	7.85	14.6	1.45	4.92	0.85	0.47	0.81	0.13	0.64	0.13	0.36	0.07	0.38	0.07	Cao, H.Y., Cai, W.C., Li, J.C., She, P.T., Zhao, J.L., 2018. Geochemical Characteristics and Petrogenesis of Xianghe gneiss in Douling rock group from ShangNan county, Shaanxi province. Mineral Exploration 9, 1724-1735.
	XH02		26.4	57.5	6.9	26.9	5.53	1.45	5.51	0.94	5.2	1.28	3.57	0.58	3.78	0.58
	XH03		14.6	29.1	3.51	12.6	2.91	1.04	2.93	0.58	3.46	0.88	2.35	0.45	2.99	0.44
	XH04		20.1	39.5	5.51	21.6	4.56	1.3	4.58	0.81	4.34	1.06	2.86	0.44	2.81	0.42
	XH05		29.5	60.9	7.5	29.2	5.95	1.75	6.34	1.1	6.12	1.48	3.77	0.61	3.66	0.54
	XH06		35.7	74.8	9.05	34.6	7.14	1.89	7.52	1.26	7	1.67	4.47	0.72	4.7	0.73
	XH07	Sericite plagioclase gneiss	36.2	70.6	8.16	29.5	5.52	1.55	5.24	1.02	5.32	1.25	3.25	0.52	3.17	0.5
	XH08		31.5	63.8	7.2	26.7	5.06	1.46	4.59	0.86	4.36	0.98	2.51	0.39	2.45	0.4
	XH09		24.8	50.6	5.83	22.9	4.81	1.84	4.47	0.92	4.79	1.13	2.9	0.47	2.92	0.43
	XH10		20.2	36.1	4.09	14.1	2.4	0.69	2.19	0.38	1.93	0.42	1.1	0.18	1.21	0.19
	XH11	Tonalite	16.5	31	3.19	10.8	1.68	0.77	1.54	0.25	1.16	0.25	0.73	0.12	0.82	0.12
	XH12		5.49	13.1	1.09	3.89	0.72	0.37	0.74	0.13	0.66	0.14	0.4	0.07	0.38	0.06
	DL12-01	Granodiorite	20.7	46.6	5.86	21.8	3.98	1.32	3.63	0.53	3.28	0.68	2.03	0.31	2.12	0.33	Zhang, J., Zhang, H., Li, L., 2018. Neoproterozoic tectonic transition in the South Qinling Belt: New constraints from geochemistry and zircon U–Pb–Hf isotopes of diorites from the Douling Complex. Precambrian Research 306, 112-128.
	DL12-02		26.9	46.6	4.63	15.5	2.59	0.79	2.39	0.32	1.86	0.38	1.07	0.17	1.11	0.17
	DL12-03	Quartz diorite	21.6	45.6	5.74	25.1	5.54	1.57	4.9	0.72	4.33	0.88	2.54	0.38	2.39	0.36
	DL12-04		18.5	37.4	4.34	17.4	3.74	1.03	3.55	0.54	3.31	0.69	1.97	0.3	1.97	0.3
	DL12-05		12.4	28.2	3.72	16.1	3.68	1.01	3.51	0.56	3.48	0.72	2.09	0.31	2.03	0.31
	DL12-06	Granodiorite	27	61.4	7.48	29.3	6.24	1.14	5.67	0.88	5.51	1.16	3.47	0.56	3.69	0.56
	FK12-84	orthogneisses	16.7	25.7	2.5	7.7	0.9	0.75	1.07	0.13	0.77	0.15	0.5	0.08	0.59	0.09	Nie, H., Yao, J., Wan, X., Zhu, X., Siebel, W., Chen, F., 2016. Precambrian tectonothermal evolution of South Qinling and its affinity to the Yangtze Block: Evidence from zircon ages and Hf-Nd isotopic compositions of basement rocks. Precambrian Research 286, 167-179.
	FK12-85		16.6	25	2.58	8.2	0.9	0.72	0.87	0.08	0.37	0.06	0.16	0.02	0.13	0.02
	LL0813		21.3	45.9	4.08	13.4	2.46	0.81	1.86	0.26	1.63	0.32	1.05	0.18	1.29	0.2
	QD92-15	gneiss	40.7	75.9	9.68	37.8	7.42	1.33	7.68	0.76	5.3	1.06	2.68	0.26	2.21	0.26	Zhao, Z.R., Wan, Y.S., Zhang, S.G., Wei, C.J., 1995. The geochemical features of the Douling Metamorphic Complex. Acta Petrologica Sinica 11, 148-159.
	QD92-17		41.1	79.6	9.75	37	7.46	1.08	7.89	0.72	5.8	1.14	3.04	0.26	2.62	0.35
	QD93-1		41.7	78.9	9.91	37.9	7.1	1.27	4.9	1.09	7.09	1.34	3.79	0.57	3.5	0.45
	QD93-2		49.1	99	10.9	41.8	7.97	2	8.8	1.3	6.55	1.34	3.88	0.43	3.64	0.73
	QD92-98	Diopside granulite	23	43.7	5.05	19.2	3.51	0.64	3.17	0.35	2.74	0.64	1.66	0.2	1.4	0.83
	QD92-99		16.3	29.4	3.48	13.6	2.37	0.53	2.22	0.38	1.92	0.35	1.06	0.16	0.98	0.1
	QD92-100		22.9	44.4	5.29	19	3.47	0.63	2.8	0.49	2.35	0.49	1.47	0.21	1.2	0.1
	QD92-104		17.1	33.4	3.68	14	2.56	0.55	2.47	0.2	1.73	0.3	0.95	0.14	0.83	0.24
	QD93-4		12.5	26.2	3.01	11.3	2.25	0.59	2.23	0.24	1.62	0.24	0.96	0.11	0.66	0.41
	QD92-51	Amphibolite	6.68	15	2.39	11.8	3.51	1.22	4.11	0.62	4.75	0.89	2.71	0.38	2.14	0.11
	QD92-97		5.22	11.3	1.57	7.32	2.19	0.76	2.38	0.48	3.06	0.66	1.93	0.25	1.59	0.17
	QD92-13		39.5	74.4	8.36	36	7.15	1.38	7.72	0.84	5.8	1.2	3.08	0.45	2.53	0.36
	QD92-92		24.6	53.7	6.59	26.5	5.56	1.5	5.39	0.82	4.15	0.82	2.2	0.33	1.59	0.38
	Zs101-2	Granite	20.5	41.6	5.39	22.3	4.77	1.72	5.27	0.8	4.8	0.99	2.68	0.37	2.23	0.34	Liu, R.Y., Li, Q.S., Niu, B.G., He, Z.J., Ren, J.S., 2018. Geochemical Characteristics and Tectonic Implications of the Xiaomaoling Composite Intrusives in South Qinling Orogenic Belt. Acta Geoscientica Sinica 39, 201-215.
	Zs109-2		15.7	34.1	4.73	20.4	4.99	1.77	5.37	0.83	5.24	1.08	2.89	0.4	2.68	0.37
	Zs111-1		7.6	17.5	2.54	11.9	3.03	1.16	3.36	0.58	3.7	0.73	2.06	0.29	1.73	0.28
	Zs160		8.9	21.2	2.86	13.1	3.51	1.27	3.92	0.66	3.98	0.8	2.3	0.29	1.95	0.29
	Zs161		6.8	16.8	2.36	10.8	2.83	1.01	3.38	0.52	3.25	0.67	1.88	0.27	1.7	0.24
	Zs103-1	Granite	22.8	49.6	6.52	26.6	5.44	1.6	4.55	0.74	4.16	0.84	2.27	0.31	2.05	0.3
	Zs105-1		28.9	51.7	6.33	23.5	4.56	1.14	4.28	0.64	3.74	0.78	2.14	0.3	1.97	0.3
	Zs113-1		32.3	63.7	7.71	30	5.97	1.38	5.22	0.81	4.58	0.9	2.57	0.36	2.36	0.34
	Zs165		34.8	65.9	7.15	26.1	4.77	1.28	4.33	0.65	3.51	0.7	2.01	0.28	1.86	0.27
	Zs117	Granite	26.9	55.8	6.76	25.1	4.72	0.95	3.67	0.59	3.47	0.68	1.86	0.28	1.9	0.27
	Zs142-2		27.5	59.8	7.83	30	6.98	1.04	7.97	1.42	9.2	1.99	6.21	0.94	6.38	0.97
	Zs106-1	Granite	69.6	152	19.7	82.2	16.5	3.91	15.3	2.43	14.3	2.77	7.53	1	6.44	0.89
	Zs141-1		35.5	81.3	9.94	40.3	7.63	2.04	7.21	1.05	5.53	1.04	2.85	0.4	2.62	0.39
	Zs141-4		30.5	57.2	6.54	26.3	5.75	1.9	5.39	0.91	4.82	0.94	2.55	0.35	2.26	0.32
	Zs156-1		35	68.5	7.65	30.1	5.68	2.07	5.33	0.8	4.47	0.87	2.52	0.33	2.19	0.33
	Zs158		31.4	66.7	7.77	31.5	6.64	2.02	6.94	1.13	6.78	1.28	3.7	0.5	3.3	0.46
	FZS-02	Granodiorite	20.15	40.35	4.05	15.51	2.86	0.84	2.92	0.45	2.55	0.53	1.47	0.23	1.71	0.27	Li, M., 2003. Geochemical characteristics and geological significance of the Neoproterozoic granitoids in the Douling group, East Qinling. Northwest University.
	FZS-10	Granodiorite	25.3	53.38	6.15	24.58	4.49	0.96	4.33	0.64	3.57	0.7	1.89	0.29	2.03	0.32
	FZS-11	Granodiorite	21.7	45.17	5.29	21.19	4.18	0.94	3.99	0.6	3.42	0.67	1.81	0.28	2.03	0.31
	FZS-16	Granodiorite	23.96	45.11	4.67	16.54	2.71	0.66	2.59	0.37	2.03	0.4	1.17	0.19	1.5	0.24
	GG-03	Quartz-diorite	21.92	39.49	4.17	15.52	2.76	0.86	2.64	0.35	2.03	0.39	1.07	0.16	1.18	0.18
	GG-11	Quartz-diorite	25.44	48.56	5.51	21.25	3.84	1.07	3.62	0.52	2.92	0.57	1.58	0.25	1.73	0.26
	GG-13	Quartz-diorite	12.61	29.88	4	17.7	3.74	0.98	3.62	0.58	3.53	0.71	1.94	0.31	2.23	0.33
	GG-15	Granite	32.03	54.94	5.56	19.22	3.02	0.81	2.94	0.41	2.31	0.44	1.28	0.23	1.86	0.3
	GG-17	Diorite	24.2	53	6.57	25.9	5.22	1.28	4.84	0.71	4	0.84	2.28	0.35	2.34	0.34
	GG-19	Diorite	19.73	37.91	4.36	17.98	3.45	1.11	3.33	0.47	2.72	0.54	1.45	0.23	1.59	0.25
	SPG-04	Diorite	20.92	39.14	4.48	18.47	3.73	1.03	3.58	0.54	3.17	0.62	1.71	0.26	1.79	0.26
	SPG-08	Diorite	21.89	39.9	4.3	15.89	2.58	0.75	2.58	0.35	2.01	0.39	1.11	0.17	1.19	0.18
	SPG-11	Diorite	11.19	26.79	3.54	16.26	3.56	1.18	3.6	0.59	3.53	0.73	1.98	0.32	2.23	0.33
	SPG-13	Diorite	9.94	19.19	2.16	8.68	1.81	0.7	1.73	0.28	1.67	0.34	0.95	0.15	1.09	0.17
	SPG-15	Diorite	18.17	33.85	3.37	12.16	2.04	0.66	2.05	0.29	1.64	0.33	0.93	0.14	1.03	0.16
	SPG-18	Diorite	16.26	35.62	4.64	20.51	4.37	1.06	4.26	0.66	3.96	0.81	2.2	0.34	2.32	0.35
	SPG-34	Diorite	16.47	33.41	3.91	16.7	3.44	0.99	3.36	0.51	2.93	0.59	1.58	0.24	1.72	0.26
	SPG-39	Diorite	14.68	31.14	3.71	16.07	3.41	0.98	3.5	0.57	3.37	0.69	1.88	0.29	2.02	0.31
	SPG-03	hornblende gabbro	11.52	28.04	4	19.5	4.6	1.25	4.5	0.72	4.41	0.89	2.3	0.34	2.26	0.32
	SPG-07	hornblende gabbro	4.11	9.76	1.34	6.82	1.78	0.66	1.88	0.33	1.96	0.4	1.06	0.16	1.09	0.15
	SPG-27	hornblende gabbro	13.04	29.64	3.8	17.11	3.67	1.07	3.54	0.54	3.11	0.62	1.66	0.25	1.74	0.26
	SPG-30	hornblende gabbro	13.09	21.67	3.54	15.45	3.28	0.95	3.28	0.51	2.94	0.59	1.55	0.23	1.6	0.24
	GG-16	enclave	23.21	52.76	7.36	31.85	6.4	1.14	5.97	0.93	5.48	1.11	3.01	0.48	3.33	0.49
	GG-20	enclave	19.42	37.16	4.29	17.95	3.42	1.17	3.34	0.48	2.7	0.53	1.45	0.22	1.54	0.23
	SPG-32a	enclave	19.68	47.88	6.82	32.84	6.93	1.74	6.17	0.97	5.48	1.11	2.93	0.46	3.21	0.48
	SPG-32c	enclave	14.07	34.63	4.95	23.99	5.28	1.51	4.83	0.77	4.4	0.91	2.42	0.37	2.64	0.38
Wudang Group	WDM1	mafic dikes	7.16	21.7	2.67	13	3.85	1.56	4.6	0.77	5.38	1.13	3.23	0.48	2.95	0.44	Li, Q., Zhao, J., 2016. Petrogenesis of the Wudang mafic dikes: Implications of changing tectonic settings in South China during the Neoproterozoic. Precambrian Research 272, 101-114.
	WDM2		6.75	20.3	2.64	12.8	3.82	1.62	4.64	0.77	5.25	1.12	3.2	0.46	2.9	0.43
	WDM3		6.5	20.2	2.57	12.5	3.78	1.49	4.63	0.77	5.26	1.13	3.23	0.46	2.88	0.43
	WDM4		7.22	21.6	2.74	13.4	3.99	1.6	4.97	0.82	5.73	1.19	3.42	0.49	3.04	0.45
	WDM5		6.48	20	2.54	12.4	3.77	1.6	4.61	0.77	5.24	1.11	3.18	0.46	2.85	0.42
	WDM6		5.95	19.9	2.29	11.2	3.32	1.32	4	0.69	4.77	1.01	2.9	0.41	2.58	0.39
	WDM7		6.63	21.1	2.74	13.2	3.98	1.66	4.6	0.81	5.54	1.17	3.34	0.48	3.02	0.45
	WDM13		5.98	19.6	2.27	10.7	3.22	1.27	3.76	0.64	4.57	0.97	2.81	0.4	2.56	0.38
	WDM15		5.05	17.1	1.89	8.92	2.69	1.08	3.23	0.56	3.93	0.84	2.36	0.35	2.15	0.32
	WDM16		6.37	20.5	2.37	11.3	3.45	1.89	4.24	0.75	5.28	1.14	3.2	0.46	2.92	0.42
	WDM29		4.87	17.8	2.05	10.4	3.21	1.32	3.75	0.65	4.49	0.94	2.64	0.38	2.36	0.35
	WDM30		6.82	21.2	2.47	11.9	3.45	1.31	3.98	0.67	4.56	0.96	2.71	0.38	2.35	0.34
	WDM31		7.37	21.8	2.74	13.2	3.71	1.48	4.35	0.73	5.1	1.06	2.96	0.42	2.63	0.39
	WDM32		6.95	21.1	2.51	11.6	3.38	1.29	4.06	0.72	4.34	0.91	2.53	0.37	2.3	0.34
	WDM33		7.12	19.9	2.59	11.9	3.52	1.3	4.21	0.74	4.56	0.95	2.67	0.39	2.43	0.35
	WDM36		3.23	13	1.44	7.17	2.37	0.95	3	0.54	3.37	0.72	2.02	0.29	1.84	0.27
	WDM38		4.02	15.1	1.89	9.43	3.09	1.14	3.95	0.71	4.42	0.94	2.64	0.38	2.35	0.35
	WDM40		3.89	14.8	1.79	9.16	2.99	1.25	3.85	0.7	4.4	0.94	2.72	0.4	2.47	0.36
	WDM41		3.41	13.6	1.63	8.34	2.67	1.16	3.52	0.63	4.02	0.86	2.45	0.36	2.25	0.33
	WDM43		3.16	13	1.45	7.34	2.33	1.02	3.09	0.55	3.42	0.76	2.13	0.31	1.95	0.29
	WDM48		5.43	17	2.16	10.5	3.23	1.33	3.91	0.71	4.37	0.91	2.59	0.38	2.32	0.35
	WDM49		2.79	11.2	1.27	6.68	2.28	0.93	3.03	0.57	3.67	0.78	2.29	0.34	2.08	0.31
	WDM54		5.49	17	2.09	10	3.08	1.27	3.78	0.68	4.18	0.9	2.59	0.38	2.4	0.35
	WDM56		5.08	15.9	2.01	9.71	2.99	1.17	3.7	0.65	4.03	0.85	2.43	0.35	2.19	0.32
	WDM57		5.67	15.8	2.04	9.35	2.79	1.17	3.37	0.61	3.77	0.8	2.3	0.33	2.11	0.31
	WDM66		3.78	11	1.5	7.48	2.27	1.17	2.83	0.48	3.1	0.66	1.9	0.27	1.71	0.26
	WDM68		2.77	9.83	1.2	6.01	1.85	0.82	2.35	0.39	2.48	0.53	1.51	0.22	1.37	0.21
	WDM70		3.22	11.8	1.37	6.83	2.07	0.91	2.67	0.45	2.85	0.59	1.72	0.24	1.6	0.23
	WDM71		3.89	14	1.64	8.3	2.51	1.19	3.09	0.55	3.41	0.73	2.09	0.3	1.91	0.28
	WDM72		3.53	13.6	1.56	7.77	2.36	0.95	2.95	0.51	3.19	0.67	1.93	0.28	1.77	0.26
	WD07	Volcanic rocks	9.38	21.3	3.05	13.9	3.25	1.25	3.67	0.614	3.75	0.773	2.24	0.329	2.14	0.322	Ling, W.L., Chen, J.J., Wang, X.H., Zhou, H.W., 2002. Geochemical features of the Neoproterozoic igneous rocks from the Wudang region and their implications for the reconstruction of the Jinning tectonic evolution along the south Qinling orogenic belt. Acta Petrologica Sinica 18, 25-36.
	WD08		26.3	64.9	8.77	38.3	8.55	1.93	8.71	1.48	8.92	1.81	5.33	0.812	5.38	0.847
	WD09-1		27.5	63.3	9.02	39.4	9.07	2.27	9.29	1.71	11.2	2.46	7.79	1.21	7.95	1.26
	WDO9-3		17.6	39.4	4.91	20.6	4.22	1.15	4.01	0.657	3.88	0.782	2.3	0.347	2.34	0.37
	WDO9-4		14.7	30	3.8	15.8	3.42	0.87	3.39	0.584	3.51	0.724	2.14	0.329	2.23	0.356
	WD12-1		22.3	50.3	6.57	27.6	6.03	1.33	6.27	1.08	6.69	1.39	4.16	0.631	4.22	0.683
	WD12-2		6.92	17	2.45	11.4	2.85	0.937	3.24	0.55	3.34	0.689	1.94	0.287	1.87	0.293
	WD13-1		25.9	58.8	7.82	33	7.14	1.32	7.33	1.29	8.02	1.66	5.01	0.764	5.09	0.81
	WD13-2		5.34	14	2.1	10.3	2.67	0.957	3.13	0.531	3.25	0.662	1.9	0.272	1.78	0.271
	WD14-1		44	86.9	10.6	40.6	8.12	0.939	7.81	1.32	7.78	1.56	4.58	0.686	4.49	0.702
	WD14-2		41.4	81.5	9.74	37	7.3	0.831	6.76	1.11	6.52	1.31	3.98	0.615	4.13	0.639
	WDO3	mafic intrusions	13.6	32	4.35	19.6	4.73	1.58	5.1	0.833	4.78	0.902	2.41	0.337	2.07	0.304
	WD19-1		3.76	10.7	1.73	9.09	2.75	0.951	3.62	0.638	4.01	0.809	2.29	0.326	2.13	0.328
	WD21		8.74	22.6	3.45	17.2	4.77	1.68	5.98	1.02	6.29	1.28	3.62	0.525	3.31	0.511
	WD22		8.44	21.8	3.37	16.7	4.63	1.68	5.88	0.994	6.16	1.25	3.54	0.506	3.26	0.503
	WD23		6.89	18.3	2.87	14.3	3.99	1.42	5.02	0.859	5.35	1.07	3.03	0.435	2.79	0.426
	WD25		7.06	18	2.75	13.6	3.84	1.36	4.72	0.826	5.07	1.03	2.95	0.428	2.76	0.431
	WD26-1		46.1	97	10.6	42.7	8.21	2.82	7.99	1.16	6.17	1.09	2.86	0.369	2.26	0.339
	WD27-1		9.78	24.2	3.53	17.2	4.62	1.67	5.76	0.976	6.09	1.23	3.5	0.512	3.29	0.505
	WD27-2		8.22	21	3.14	15.8	4.48	1.14	5.56	0.957	5.9	1.19	3.31	0.471	3.03	0.452
	WD21D		8.99	23.6	3.59	17.8	4.98	1.73	6.2	1.05	6.5	1.32	3.73	0.539	3.4	0.525
Yaolinghe Group	WD30-1	volcanic rocks	153	303	33.7	123	22.6	1.87	21.3	3.2	18	3.6	9.64	1.36	9.38	1.41	Ling, W.L., Chen, J.J., Wang, X.H., Zhou, H.W., 2002. Geochemical features of the Neoproterozoic igneous rocks from the Wudang region and their implications for the reconstruction of the Jinning tectonic evolution along the south Qinling orogenic belt. Acta Petrologica Sinica 18, 25-36.
	WD31		16.3	37.9	5.13	22.3	5.46	1.3	5.04	0.843	4.92	0.972	2.5	0.335	2.29	0.327
	WD32		230	441	47.8	177	36	3.83	35.7	5.99	34.5	6.89	18.2	2.5	18	2.59
	WD33		26.9	63.4	8.22	35.4	8.19	2.58	7.21	1.08	6.17	1.15	2.79	0.364	2.42	0.357
	WD34		33.7	84.6	8.94	37	11.5	0.917	11.7	2.46	16.1	3.58	9.98	1.55	11.3	1.61
	WD34-1		123	239	28.2	108	20.4	1.17	18.3	2.73	14.8	2.96	7.57	1.12	7.81	1.17
	WD35-1		22.8	52.9	7.09	32.4	8.69	2.24	8.7	1.5	8.96	1.9	4.75	0.695	4.67	0.651
	WD35-1		23.1	52.2	7.04	31.3	8.45	2.13	7.71	1.43	8.91	1.82	4.73	0.682	4.47	0.649
	WD35-2		20.1	47.5	6.49	29.7	7.67	2.1	7.6	1.31	7.99	1.69	4.35	0.61	4.35	0.597
	WD35-3		15	35.7	4.82	22.5	5.83	1.74	6.03	1.06	6.65	1.39	3.51	0.52	3.42	0.497
	WD35-4		18.1	44	6.05	28.2	7.62	1.98	7.25	1.35	8.22	1.74	4.5	0.643	4.24	0.611
	WD35-5		19.8	44.6	6.52	30.1	7.59	2.13	6.9	1.22	6.97	1.45	3.58	0.483	3.18	0.424
	WD35-6		14.8	35.4	4.81	22.4	5.88	1.66	5.87	1.02	6.38	1.42	3.62	0.54	3.51	0.509
	WD36-1		9.11	17.6	2.34	10.9	3.04	1.32	3.29	0.587	3.56	0.818	2.06	0.302	1.96	0.332
	WD36-3		14.8	34.9	4.72	21.8	5.53	1.6	5.84	1.05	6.38	1.44	3.54	0.53	3.3	0.515
	WD36-4		14.5	34.3	4.71	21.4	5.56	1.74	5.67	1.08	6.45	1.38	3.59	0.518	3.43	0.486
	WD37		14.1	33.5	4.61	21.3	5.86	1.63	5.65	1.09	6.45	1.41	3.52	0.533	3.47	0.514
	WD38		37.2	92.3	12	53.1	12.2	3.01	11.3	2	11.8	2.6	6.75	0.979	6.53	0.957
	CK-1	Volcanic Sandstone	11.9	27.1	2.88	12.6	2.85	1.23	3.01	0.47	3.01	0.61	1.89	0.28	1.62	0.26	Xiang, Z., Yan, Q., White, J.D.L., Song, B., Wang, Z., 2015. Geochemical constraints on the provenance and depositional setting of Neoproterozoic volcaniclastic rocks on the northern margin of the Yangtze Block, China: Implications for the tectonic evolution of the northern margin of the Yangtze Block. Precambrian Research 264, 140-155.
	CK-2		12.6	27.1	3.43	14.3	3.33	1.57	3.33	0.57	3.51	0.77	2.4	0.33	2.04	0.35
	CK-4		13.9	30.3	3.99	16.2	3.84	1.48	3.76	0.66	3.85	0.83	2.6	0.36	2.48	0.37
	CK-5		6.42	17.7	2.2	10.8	3.38	1.11	3.89	0.66	4.16	0.96	2.66	0.34	2.39	0.36
	CK-6		17.2	48.7	4.09	16.9	4.27	0.97	3.79	0.69	4.05	0.84	2.7	0.41	2.71	0.45
	CK-9		9.33	21	2.83	12.3	3.29	1.09	3.3	0.53	3.41	0.68	1.93	0.27	1.82	0.25
	CK-10		11.2	25	3.38	13.8	3.48	1.21	3.57	0.54	3.52	0.78	2.15	0.28	1.61	0.29
	CK-14		9.21	21.6	2.89	13	3.31	1.1	3.24	0.53	3.07	0.66	1.92	0.26	1.74	0.24
	CK-15		10.2	23.6	3.12	13.1	3.2	1.4	3.44	0.57	3.5	0.71	2.14	0.26	1.73	0.25
	CK-19		8.07	19.6	2.86	11.9	3.2	1.01	3.11	0.48	3.04	0.68	1.86	0.26	1.91	0.27
	CK-20		13.4	29.4	3.92	17.4	4.28	1.47	4.53	0.73	4.67	0.94	2.83	0.37	2.67	0.38
	CK-23		9.93	23.3	3.19	14.2	3.87	1.29	3.95	0.66	4.06	0.76	2.62	0.36	2.34	0.34
	CK-26		10.9	23.7	3.17	14.4	3.56	1.32	3.96	0.67	3.78	0.81	2.35	0.35	2.37	0.38
	CK-27		11.9	25.6	3.35	14.6	3.95	1.32	4.06	0.64	4.18	0.95	2.75	0.38	2.48	0.39
	CK-3	Volcanic Siltstone	7.63	19	2.9	12.9	3.59	1.06	3.97	0.78	4.78	0.93	2.9	0.36	2.81	0.4
	CK-7		21.3	45.2	5.97	25.8	6.22	1.9	6.07	0.99	5.83	1.21	3.79	0.51	3.24	0.49
	CK-8		15.8	38	5.11	22.4	5.35	1.45	5.25	0.94	5.4	1.1	3.17	0.44	2.91	0.43
	CK-11		27.5	56	7.1	27.8	6.73	1.99	5.48	0.88	4.73	0.98	3.09	0.39	2.66	0.41
	CK-12		11.1	24.8	3.35	15.5	4.29	1.34	4.54	0.73	4.24	0.87	2.62	0.35	2.37	0.36
	CK-13		5.16	14.4	1.92	9.29	2.77	0.66	2.37	0.43	2.95	0.55	1.74	0.26	1.5	0.25
	CK-16		17.8	39	5	19.7	4.99	1.4	4.78	0.77	4.37	0.89	2.62	0.32	2.13	0.31
	CK-17		13.6	31.4	4.03	16.6	4.19	1.2	3.96	0.7	4.66	0.92	3.02	0.44	3.02	0.44
	CK-18		10.9	26.5	3.61	15.5	3.89	0.89	3.69	0.67	4.12	0.99	3.09	0.44	2.93	0.46
	CK-21		25.1	52.4	6.36	24.4	5.65	1.5	4.63	0.86	4.83	0.97	2.79	0.37	2.61	0.4
	CK-22		8.49	24.3	2.86	12.8	3.17	1.03	3.1	0.51	3.12	0.68	1.94	0.31	1.89	0.31
	CK-24		10.1	26.6	3.27	13.4	3.29	1.07	3.2	0.59	3.23	0.69	2.21	0.26	1.76	0.29
	CK-25		15.3	30.9	3.93	16.9	4.06	1.34	4.06	0.73	3.98	0.81	2.59	0.37	2.33	0.35
	HYLH-3	meta-mafic volcanic rocks	16.8	39	5.63	25.3	7	2	6.65	1.22	7.2	1.46	3.87	0.54	3.22	0.42	Zhu, X., Chen, F., Nie, H., Siebel, W., Yang, Y., Xue, Y., Zhai, M., 2014. Neoproterozoic tectonic evolution of South Qinling, China: Evidence from zircon ages and geochemistry of the Yaolinghe volcanic rocks. Precambrian Research 245, 115-130.
	HYLH-4		7.97	17.9	2.55	11.4	3.23	0.99	3.14	0.6	3.65	0.76	2.11	0.3	1.88	0.26
	HYLH-5		17.4	40	5.6	25.2	6.91	2.12	6.74	1.24	7.35	1.5	4.01	0.56	3.46	0.47
	HYLH-6		20	44.4	5.97	25.4	6.35	1.89	5.88	1.03	6.06	1.2	3.02	0.39	2.09	0.23
	HYLH-7		16	37.3	5.08	21.7	5.62	1.36	4.97	0.84	5.22	0.99	2.72	0.41	2.49	0.36
	08HN71		8.15	18.1	2.51	11	2.7	0.77	2.4	0.42	2.47	0.51	1.4	0.2	1.22	0.16
	YLH0901		49	134	19.5	85.2	18.6	4.67	14.1	2.18	11.8	2.28	6.21	0.86	5.35	0.71
	AK11-06		26	68.8	10.2	51.5	13.5	4.76	13.1	2.15	12.5	2.51	6.73	0.93	6.11	0.89
	AK11-07		27.9	74.6	11.1	56.4	14.8	5.16	14.2	2.28	12.9	2.55	6.69	0.91	5.83	0.84
	AK11-12		19.5	46.4	6.14	27.8	6.47	2.02	5.84	0.95	5.5	1.08	2.94	0.41	2.62	0.37
	AK11-08	meta-felsic volcanic rocks	11.7	26.2	3.44	16	4.01	1.38	3.78	0.64	3.84	0.79	2.21	0.32	2.14	0.31
	SQ11-05		22.4	40.3	4.88	18.1	3.57	0.93	3	0.49	2.91	0.6	1.79	0.28	2.1	0.33
	FK11-13		57.5	128	13.6	51.6	10.4	1.42	9.15	1.32	7.44	1.48	4.1	0.63	4.43	0.67
	FK11-14		44	94.4	10.2	39.5	8.72	0.91	8.87	1.46	8.88	1.91	5.4	0.83	5.67	0.85
	GS-1	acid volcanic rocks	160.23	362.47	44.25	154.67	37.19	2.76	38.62	6.85	44.54	9.1	24.78	4.03	24.99	3.55	Luo, Y., Li, J.F., 2010. Geochemical Characterisitcs for two types of acid volcanic rocks of the Yaolinghe Group in the Wudang Block. Geotectonica et Metallogenia 34, 125-132.
	GS15		169.75	318.74	40.62	152.48	30.15	1.95	28.95	4.52	24.95	4.89	13.27	2.1	13.14	2.04
	GS4		31.01	66.61	8.56	32.45	6.38	1.57	5.74	1.02	5.91	1.19	3.42	0.53	3.43	0.52
	GS6		31.22	63.85	8.38	34.88	7.55	1.59	7.51	1.47	9.64	2.03	5.86	0.96	6.43	1.01
	GS10		37.67	80.8	10.33	36.61	6.85	1.79	5.99	0.98	6.15	1.25	3.69	0.58	3.61	0.54
	YQ-06	meta-volcanic rocks	29.8	55.6	5.54	21.3	3.51	0.95	2.07	0.37	1.94	0.37	0.98	0.15	0.92	0.14	Su, C.Q., Hu, J.M., Li, Y., Liu, J.Q., 2006. The existence of two different tectonic attributes in Yaolinghe Group in South Qinling region. Acta Petrologica et Mineralogica 25, 287-298.
	1YQ		52.6	98.9	10.8	37	7.6	1.26	4.61	0.8	4.35	0.87	2.38	0.36	2.19	0.34
	3YQ		41.4	72.3	9.22	34.5	5.85	1.7	3.26	0.56	2.2	0.42	0.97	0.15	0.91	0.13
	YQ-4		57.5	110	13.1	50.4	10.6	1.56	7.57	1.33	7.89	1.69	4.93	0.77	4.63	0.75
	5YQ		21.32	43.15	4.8	18	4.05	1.21	3.04	0.52	3.31	0.73	2.36	0.27	1.84	0.21
	17YQ		27.29	61.87	5.13	18.86	4.31	1.47	3.56	0.59	3.36	0.77	2.54	0.27	2.28	0.22
	9-1		31.7	63.1	8.23	38.6	8.63	2.36	8.68	1.38	8.61	1.65	4.4	0.56	3.26	0.5
	19-1		28.4	57.5	7.19	36.4	7.8	2.61	7.57	1.26	8.19	1.57	4.28	0.58	3.48	0.53
	42-2		23.5	46.8	5.74	27.8	5.56	1.57	4.24	0.66	2.75	0.47	0.96	0.14	0.84	0.13
	67-1		13.1	26.1	3.68	19.3	4.29	1.57	3.95	0.7	3.97	0.76	1.85	0.27	1.67	0.26
	81-1		25.8	50	5.83	27.8	5.98	1.89	5.28	0.95	5.91	1.17	3.14	0.45	2.7	0.43
	86-5		13.3	27.5	3.53	18	4.26	1.36	4.14	0.75	5.11	1.05	2.84	0.38	2.37	0.36
	1-1		26.1	55.6	6.85	35.2	7.47	2.37	7.16	1.25	7.66	1.52	4.05	0.51	3.06	0.48
	1YQ		18.5	40	4.96	24.9	5.47	1.82	5.49	0.85	4.65	1.03	2.38	0.37	2.31	0.35
	3	meta-spilite	12.38	27.07	4.17	14.89	4.11	1.32	4.08	0.72	4.01	0.79	2.13	0.37	1.84	0.27	Wang, S.Q., 1994. REE characteristics and tectonic environment analysis of Yaolinghe group in southern central Qinling. Henan Geology 12, 318-327.
	5		38.15	91.87	14.27	56.27	13.85	4.73	13.45	2.32	12.22	2.31	6	0.9	5.11	0.72
	7		11.97	109.49	16.95	56.47	12.53	2.72	11.74	2.11	13.05	2.52	7.3	1.15	7.16	1.02
	15		32.25	75.63	8.42	32	7.11	1.69	7.21	1.24	7.34	1.51	4.17	0.67	4.38	0.61
	347		23.9	51.6	7.54	30.72	7.65	2.31	8.1	1.42	8.12	1.57	4.39	0.66	3.91	0.59
	348		22.91	49.47	7.09	29.8	7.61	2.28	8.01	1.37	7.73	1.49	4.05	0.64	3.57	0.56
	349		14.15	31.47	4.65	17.81	5.19	1.68	5.72	0.93	6.08	1.19	3.22	0.49	305	0.45
	377		53.06	117.66	13.84	52.48	10.37	3.49	8.75	1.33	7.59	1.42	3.71	0.55	3.17	0.45
	383		23.14	52.73	6.59	25.82	5.46	1.92	5.07	0.82	4.56	0.83	215	0.31	1.82	26
	8		24.18	53.11	7.8	34.56	8.3	2.54	8.5	1.34	9.01	1.64	4.78	0.65	4.46	0.6
	18		13.7	33.1	3.8	19.6	5.4	1.6	4.3	0.66	4.6	0.51	2.7	0.32	1.5	0.13
	22		4.3	10.9	1.2	6.1	1.8	0.68	2.3	0.27	2.7	0.56	1.7	0.21	1.3	0.11
	23		16.5	38.4	3.7	17.8	4.1	1.4	3.9	0.38	4.8	0.86	2.8	0.31	1.9	0.18
	24		19.2	42.6	4.6	23.5	6.1	1.9	4.5	0.64	5.2	0.82	3	0.39	1.9	326
	25		29.6	69	8.4	43.2	10.2	3.3	7.2	1.2	6.3	1.1	3.6	0.35	2.3	0.31
	26		77.4	144.7	14.3	65.7	12.9	4.2	11.2	1.8	10.2	2.1	5.1	0.57	43.2	0.59
	33		16.8	30	3.6	16	4	1.3	3.3	0.4	2.8	0.58	1.4	0.2	1.2	0.18
	380		12.9	32.66	4.69	19.85	4.78	1.94	4.82	0.86	4.68	0.9	2.21	0.35	1.95	0.28
	381		14.52	37.31	5.31	23.58	5.04	2	5.09	0.65	4.91	0.98	2.61	0.38	2.39	0.36
	371		66.03	127.86	14.79	57.79	13.13	3.6	13.25	2.25	13.69	2.69	7.53	1.15	7.07	1.04
	372		31.56	51.21	7.99	30.85	6.94	2.52	6.59	0.98	7.49	0.08	2.4	0.34	1.85	0.26
	373		20.45	47.97	6.76	29.82	7.11	2.46	7.03	1.39	8.14	1.61	4.3	0.63	3.85	0.58
	374		18.87	45.43	6.35	27.29	6.66	2.14	7.4	1.3	7.93	1.56	4.02	0.64	3.85	0.56
	375		23.36	54.86	7.5	32.11	7.8	2.52	8.24	1.47	8.82	1.75	4.65	0.72	4.3	0.64
	246		13.26	26.66	3.4	16	5.6	1.7	5.2	0.72	1.9	1.1	3.1	0.38	2	0.34
	248		18.6	36	4.2	17.6	5.8	1.1	5	0.7	3	1.24	3.8	0.52	2.5	0.6
	249		16.6	30	4	17.4	5.6	2	6	0.97	6.1	1.25	3.4	0.44	2.1	0.37
	27	intermediate rock	40	85.7	12.1	51.4	14.7	0.49	15.5	2.7	13.3	3	8	1.13	8	1.1
	29		12.7	22.7	2.7	11.4	1.7	0.5	1.7	0.2	1	0.2	0.7	0.1	0.63	0.1
	384		62.44	124.9	14.76	50.77	9.8	2.35	8.9	1.57	10.1	2.09	6.42	1.13	7.8	1.22
	2	meta-pelitic tuff	21.85	40.97	4.84	17.31	3.23	0.61	3.16	0.58	3.35	0.73	2.2	0.36	2.6	0.4
	11		23.94	51.59	8.04	31.15	7.61	2.81	7.5	1.19	7	1.26	3.36	0.47	2.83	0.4
	17		27.28	57.09	8.72	33.88	8.65	2.67	8.89	1.54	9.15	1.77	4.74	0.72	4.27	0.62
	28	Acid volcanic rocks	29.6	41.2	6.6	27	5.3	1.3	4.3	0.7	4.98	1.2	3.2	0.45	3.1	0.4
	34		20.06	44	6	22.6	8	0.34	13	2.9	15	4.2	11	1.8	5.6	1.4
	245		33.6	51	6.4	22.4	5	1.03	3.6	0.46	3.1	0.58	1.6	0.2	1.4	0.21
	247		26	42	5	17.8	4.2	0.77	3.3	0.46	3.5	0.6	2.2	0.28	1.7	0.29
	379		17.93	39.16	5.47	22.64	5.05	1.68	4.99	0.86	5.02	0.93	2.69	0.4	2.44	0.37
Doushantuo Formation	Smy17-1	black shale series	23.1	42.9	5.03	19.5	3.61	0.81	3.01	0.41	2.32	0.46	1.43	0.22	1.51	0.22	Wu, F.Q., Yao, H.Z., 2017. On the geochemcial features of the sedimentary environment of the late Doushantuo Stage in Mingyue Section, Chengba Fault Bolck. Journal of Geology 41, 529-534.
	Smy17-2		19.8	38.1	4.55	17.1	3.09	0.66	2.4	0.36	2.32	0.5	1.55	0.24	1.5	0.21
	Smy17-6		18.2	42.1	4.97	23.2	6.16	1.92	7.29	0.98	5.18	0.95	2.41	0.33	1.9	0.29
	Smy17-8		26.8	56.1	7.64	35	8.43	1.88	10.3	1.54	9.2	1.9	4.9	0.66	4	0.6
	Smy17-9		21.6	38.4	4.54	16.7	3.06	0.52	1.98	0.3	1.84	0.43	1.52	0.23	1.5	0.23
	Smy19-28		9.82	21.4	2.85	13.1	3.77	0.92	5.42	0.72	4.13	0.86	2.22	0.27	1.57	0.23
	Smy19-29		17.2	33.9	4.33	16.6	3.52	0.6	2.46	0.34	2.36	0.48	1.38	0.21	1.46	0.21
	Smy19-30		19.8	37.7	4.72	17.8	3.55	0.66	3.08	0.44	2.96	0.56	1.64	0.25	1.74	0.23
	Smy19-31		25.7	50.4	6.05	23.3	4.16	0.86	3.95	0.55	3.46	0.69	2.14	0.33	1.99	0.3
	Smy19-32		20.4	41	5.05	22	4.64	0.91	4.4	0.66	3.99	0.87	2.49	0.34	2.09	0.31
	Smy19-33		23.2	45.5	5.55	20.8	3.92	0.76	3.01	0.39	2.48	0.59	1.8	0.25	1.85	0.27
	Smy21-1		19.4	34.5	4.06	14.9	2.79	0.58	2.38	0.41	2.94	0.62	1.82	0.27	1.85	0.24
	Smy21-2		15	26.6	3.02	11.3	1.49	0.27	1.39	0.23	1.47	0.34	1	0.15	1.1	0.17
	Smy21-3		16.2	31.5	3.49	12.6	1.88	0.38	1.37	0.17	1.41	0.34	0.95	0.17	1.28	0.19
	Smy21-4		19.8	39	4.45	16.5	2.7	1.49	2.46	0.36	2.09	0.48	1.43	0.21	1.38	0.22
	Smy21-5		7.5	8.15	1.54	6.35	1.38	0.4	1.58	0.22	1.35	0.32	1.01	0.11	0.63	0.11
	CXZd-1	dolomite	12.4	19.1	2.49	9.99	2.14	0.6	2.46	0.4	2.55	0.54	1.52	0.25	1.44	0.2	Wei, K., Li, X.B., Liu, A., Li, J.T., Bai, Y.S., Zhou, P., Chen, X.H., 2015. Trace element characteristics of carbonate rocks from the Ediacaran Doushantuo Formation of Xikou section, Cili County, Hunan Province and its palaeoenvironmental significance. Journal of Palaeogeography 17, 297-308.
	CXZd-2		15	25.6	2.89	12.6	2.82	0.85	3.32	0.54	3.34	0.71	1.83	0.27	1.38	0.17
	CXZd-3	argillaceous dolomite	11.9	19.6	2.76	10.7	2.31	1.22	2.12	0.35	2.09	0.41	1.07	0.17	1.13	0.16
	CXZd-4		15.5	30.1	4.28	17	3.5	0.96	3.2	0.52	2.88	0.54	1.36	0.22	1.32	0.19
	CXZd-5		26.5	47.9	6.97	25.2	4.99	0.78	4.04	0.68	3.75	0.67	1.79	0.3	2.05	0.28
	CXZd-6		7.98	14.9	2.11	8.35	1.79	0.74	1.61	0.26	1.5	0.29	0.69	0.11	0.69	0.09
	CXZd-7		5.88	10.8	1.48	5.79	1.2	0.47	1.14	0.19	1.13	0.22	0.59	0.09	0.57	0.09
	CXZd-8		5.96	10.5	1.52	5.88	1.21	0.46	1.14	0.19	1.1	0.2	0.53	0.09	0.55	0.08
	CXZd-9		6.64	9.87	1.36	5.08	1	0.49	0.94	0.16	0.84	0.16	0.39	0.06	0.36	0.05
	CXZd-10		9.1	17.4	2.41	9.42	1.98	0.6	1.78	0.3	1.7	0.32	0.82	0.14	0.84	0.12
	CXZd-11		7.9	14.8	2.05	7.99	1.7	0.54	1.53	0.26	1.51	0.29	0.78	0.12	0.81	0.1
	CXZd-12		6.53	12.3	1.71	6.76	1.49	0.51	1.39	0.22	1.29	0.24	0.64	0.11	0.65	0.09
	CXZd-13		6.92	11.9	1.75	7.03	1.42	0.41	1.33	0.21	1.22	0.22	0.57	0.09	0.52	0.07
	CXZd-14		5.19	7.22	1.36	5.86	1.16	0.4	1.08	0.16	0.9	0.17	0.44	0.07	0.38	0.05
	CXZd-15		3.31	5.28	0.78	3.1	0.65	0.32	0.59	0.09	0.53	0.1	0.28	0.05	0.31	0.04
	CXZd-16	microcrystalline limestone	3.54	5.49	0.87	3.46	0.68	0.19	0.63	0.11	0.66	0.13	0.36	0.06	0.36	0.05
	CXZd-17		1.92	2.91	0.44	1.74	0.36	0.19	0.35	0.05	0.33	0.06	0.17	0.03	0.16	0.03
	CXZA-18	argillaceous dolomite	3.78	6.18	0.88	3.42	0.72	0.25	0.65	0.11	0.64	0.12	0.34	0.06	0.34	0.05
	CXZd-19		5.82	9.52	1.53	6.23	1.28	0.46	1.32	0.22	1.25	0.24	0.65	0.1	0.62	0.09
	CXZd-20	argillaceous dolomite	3.63	6.68	1	4	0.84	0.29	0.8	0.14	0.77	0.15	0.42	0.07	0.42	0.06
	CXZd-21		3.41	6.13	0.92	3.82	0.82	0.3	0.8	0.14	0.8	0.16	0.42	0.07	0.43	0.06
	CXZd-22	argillaceous dolomite	1.27	2.54	0.34	1.4	0.32	0.19	0.31	0.05	0.31	0.06	0.17	0.03	0.19	0.03
	CXZd-23	phosphorous limestone	0.93	1.36	0.3	1.4	0.34	0.08	0.33	0.05	0.27	0.05	0.14	0.02	0.11	0.01
	CXZd-24		3.23	5.18	0.71	2.8	0.55	0.24	0.55	0.09	0.52	0.1	0.26	0.05	0.26	0.04
	CXZd-25	argillaceous dolomite	4.55	8.22	1.14	4.37	0.92	0.33	0.82	0.13	0.72	0.13	0.33	0.06	0.34	0.05
	CXZd-26		5.21	8.57	1.18	4.58	0.94	0.34	0.84	0.13	0.7	0.13	0.34	0.06	0.35	0.05
	CXZd-27	mcrocrystalline limestone	1.1	1.45	0.25	1.07	0.2	0.1	0.22	0.03	0.19	0.04	0.12	0.02	0.1	0.01
	CXZd-28		2.21	3.58	0.56	2.35	0.44	0.17	0.49	0.07	0.4	0.08	0.21	0.04	0.21	0.03
	CXZd-29		3.81	6.07	0.96	4.01	0.82	0.24	0.75	0.12	0.62	0.12	0.33	0.05	0.3	0.04
	CXZd-30		1.82	3.04	0.48	2.06	0.43	0.14	0.46	0.07	0.38	0.07	0.18	0.03	0.16	0.02
	CXZd-31		1.78	2.94	0.42	1.79	0.36	0.12	0.38	0.06	0.34	0.07	0.17	0.03	0.17	0.02
	CXZd-32		3.04	5.35	0.72	2.8	0.56	0.18	0.54	0.09	0.48	0.09	0.25	0.04	0.26	0.04
Dengying Formation	HW18	dolomite	0.37	0.64	0.05	0.22	0.03	0.04	0.02	0	0.04	0.01	0.02	0.01	0.02	0.01	Zheng, D.S., Liu, S.C., Xu, J.H., Wang, Z.J., Li, Y., 2018. Geochemistry of the dolomite from Dengying Formation in Xichuan, southwest Henan Province: Implications for paleoenvironment. Marine Geology & Quaternary Geology 38, 112-122.
	HW16		0.28	0.25	0.02	0.15	0.03	0.02	0.01	0	0.03	0.01	0.01	0	0.01	0
	HW15		0.27	0.33	0.03	0.14	0.02	0.01	0.02	0	0.03	0.01	0.01	0	0.01	0
	HW13		0.79	0.9	0.1	0.45	0.06	0.02	0.08	0.01	0.09	0.02	0.05	0.01	0.06	0.01
	HW11		0.96	1.44	0.15	0.65	0.11	0.03	0.1	0.01	0.1	0.02	0.05	0.01	0.05	0.01
	HW10		0.3	0.35	0.03	0.18	0.03	0.01	0.02	0.01	0.04	0.01	0.02	0	0.02	0.01
	HW8		3.32	5.22	0.56	2.1	0.4	0.09	0.4	0.07	0.5	0.09	0.26	0.05	0.27	0.05
	HW7		0.55	0.74	0.1	0.48	0.08	0.02	0.07	0.01	0.1	0.02	0.06	0.01	0.06	0.01
	HW6		0.84	1.67	0.21	0.9	0.18	0.04	0.15	0.03	0.21	0.04	0.11	0.02	0.13	0.02
	HW3		1.32	2.81	0.29	1.22	0.26	0.06	0.24	0.04	0.28	0.06	0.13	0.03	0.14	0.03
Shuigoukou Formation	SG－GZ－1	chert	4.21	8.12	0.99	4.07	0.81	0.36	0.79	0.09	0.65	0.12	0.32	0.05	0.4	0.05	You, J., Zhang, F.J., Cao, H.Y., Wang, J.M., Cai, W.C., Li, J.C., She, P.T., 2018. Geochemical Characteristic and Significance of Silicolites from the Lower Cambrian Shuigoukou Formation in Zhongcun－Xianghe Area, Shaanxi. Mineral Exploration 9, 12-21.
	SG－GZ－2		5.11	9.13	1.14	4.35	0.89	1.3	0.94	0.15	0.74	0.2	0.47	0.09	0.57	0.1
	SG－GZ－3		6.74	18.7	1.47	6.02	1.23	0.51	1.28	0.22	1	0.26	0.52	0.1	0.57	0.1
	SG－GZ－4	Carbonaceous siliceous slate	13.2	12.6	3.16	15.2	3.55	1.04	4.05	0.88	4.49	1.35	3.46	0.64	3.65	0.6
	SG－GZ－5		23.8	23.6	6.51	27.8	6.53	2.88	7.56	1.45	9.29	2.88	7.95	1.38	8.15	1.24
	SG－GZ－6		53.2	43.8	8.66	36.2	7.29	3.16	8.91	1.64	8.52	2.59	6.37	1.12	5.9	1
	SG－GZ－7		13.8	13.8	3.23	15.5	3.38	1.72	3.98	0.78	5.06	1.29	3.36	0.53	3.69	0.54
	SG－GZ－8	Carbonaceous siliceous slate containing phosphorus nodules	36	39.8	6.6	27.8	5.48	3.91	6.02	1.01	6.54	1.71	4.6	0.71	4.74	0.66
	SG－GZ－9		28.6	18.7	7.65	37	8.92	3.04	10.6	2.23	14.4	3.9	12.3	1.92	12.5	1.8
	X-GZ-1	chert	7.3	8.5	1.4	5.6	1	4	1	0.4	1.2	0.4	0.9	0.3	1.7	0.3	Wang, L.S., Zhang, F.X., Hou, J.F., Fang, B., Zhou, Y., 2012. Trace element geochemical characteristics of the Shuigoukou Formation black rock series in Shanyang area of the Qinling Mountains and their indication significance for sedimentation-mineralization. Geology in China 39, 311-325.
	X-GZ-2-1	Carbonaceous argillaceous chert	24.3	39.9	4.7	18.4	3.1	11.6	3.2	0.5	2.4	0.6	1.6	0.4	3.5	0.8
	X-GZ-2-2		19.5	31	3.6	13.7	3.1	9.9	3.3	0.7	2.1	0.5	16	0.3	2.8	1
	X-GZ-3		31.6	47.7	6.2	21.2	3.4	4.8	3.7	0.6	3	0.8	2.1	0.4	2.8	0.4
	X-Js-4	Phosphorous argillite	27.9	26.6	6	27.6	6.7	27.3	4.6	1.6	12.5	3.9	7.2	1.8	15.6	2.2
	X-Js-5	argillaceous slate	64.3	113.7	13.6	54.8	8.5	39.1	8.7	1.5	8	2	5.1	0.8	9	1.8
	X-Js-6	chert	34.3	64.7	8.2	26.8	4.6	5.8	4.4	0.6	4	1	2.7	0.5	3.4	0.5
	X-LS-1		5	5	1.4	6	1.3	2	1	0.4	2.1	0.6	1.2	0.3	2.3	0.3
	X-1S-2	chert	18.5	34.3	3.4	12.7	2.4	19.8	2	0.5	2.2	0.6	1.4	0.4	4	1
	X-LS-5-2	Vanadium ore	39.5	68.5	8.3	33.6	6.5	23.5	5.6	1.3	5.3	1.4	3.6	0.6	6.5	1.3
	X-WS-3	Carbonaceous siliceous rock	15.4	12.6	3.9	16.6	3.5	2.4	1.7	0.7	3.4	0.9	2.2	0.4	3.2	0.4
	X-WS-4	Vanadium ore	30	26.3	4.7	21.3	3.9	25.4	3.6	0.9	4.5	1.3	2.7	0.7	6.5	1.4
	X-WS-5	schist	29.2	28.7	3.8	17.9	3	36.9	3.2	0.6	3	0.9	1.9	0.5	5.3	1.5
	X-WS-6	schist	20.6	23.6	4	10.5	2	1.3	1.7	0.4	1.9	0.5	1.2	0.3	1.6	0.3
	X-Z-Z-1	schist	25	33	5	20	3.7	11	3.4	0.8	4.4	1.3	2.9	0.6	5.1	0.9
	X-Z-Z-3	schist	76	66	18	82	17	18	12	3.9	23	6.8	13	2.1	19	2.4
	X-Z-Z-6	schist	66	87	13	54	9.7	51	9	1.1	9	2	5.7	1	11	2.6
	X-XL-2	Vanadium ore	5.6	6.8	1.1	5.6	1.3	10.6	0.9	0.4	1	0.2	0.6	0.2	1.7	0.4
	X-XL-4	Carbonaceous siliceous rock	6.6	4.5	0.5	6.6	1	29.4	0.8	0.3	0.6	0.2	0.3	0.2	1.4	0.5
	X-XL-6	Carbonaceous siliceous rock	16.4	30.6	3.9	14.2	2.5	14.2	2.6	0.4	1.8	0.5	1.3	0.3	2.1	0.4
	X-XL-7	Carbonaceous siliceous rock	16	23.5	3.5	12.1	2.2	5	1.8	0.5	2.1	0.6	1.3	0.3	2.1	0.4
	YJZ01-3	chert	9.13	11.52	1.9	7.64	1.23	0.34	1.84	0.37	2.66	0.61	1.8	0.27	1.64	0.24	Wang, Y.S., 2016. Sequence characteristics and ore bearing properties of the lower Cambrian Shuigoukou formation in southwestern Henan. China University of Geosciences (Beijing).
	YJZ01-5		1.12	1.15	0.29	1.29	0.27	0.08	0.32	0.09	0.5	0.12	0.37	0.07	0.39	0.06
	YJZ02-2		3.1	2.51	0.77	3.57	0.8	0.22	1.02	0.19	1.18	0.27	0.79	0.12	0.76	0.11
	WGDO1-05		2.7	4.47	0.6	2.27	0.44	0.11	0.45	0.09	0.49	0.09	0.26	0.04	0.24	0.03
	QZ01-05		8.52	9.4	1.57	6.07	1	0.22	1	0.18	1.03	0.21	0.61	0.09	0.52	0.07
	QZ01-02	Aluminous siliceous rocks	71.49	110.29	14.25	49.98	6.61	1.11	5.22	0.75	4.34	0.92	2.78	0.46	3.12	0.44
	QZ01-04		39.42	49.65	9.81	38.22	5.83	1.27	6.14	1.16	7.78	1.73	5.14	0.82	5.27	0.73
	QZ01-06		44.5	79.1	11.04	44.21	7.58	1.39	5.83	0.9	5.48	1.14	3.35	0.55	3.53	0.48
	YJZ014-1	Argillaceous dolomite	31.3	36	10.12	48.1	11.12	2.95	16.61	3.11	23.39	5.62	17.09	2.71	17.03	2.48
	YJZ01-9	calcarenite	16.94	25.93	3.55	14.1	2.67	0.63	2.65	0.47	2.8	0.6	1.63	0.25	1.61	0.22
	YJZ02-4		13.59	18.9	3.12	12.68	2.78	0.77	3.31	0.62	3.75	0.74	2.07	0.35	2.32	0.34
	YJZ02-7	Dolomitic arenaceous limestone	8.51	14.26	1.78	6.48	1.12	0.21	0.92	0.17	0.91	0.18	0.5	0.08	0.53	0.08
	YJZ02-9		10.06	17.51	2.13	7.61	1.32	0.25	1.11	0.21	1.07	0.21	0.59	0.1	0.63	0.09
	YJZ01-8-2	chert	1.06	2.22	0.33	1.6	0.42	0.12	0.53	0.12	0.7	0.16	0.46	0.07	0.43	0.06	Zuo, P.F., 2016. Tectonic evolution and black rock series mineralization in the Middle Proterozoic to early Paleozoic in Southwest Henan Province. China University of Geosciences (Beijing).
	JJY01-07		2.89	3.27	1	4.89	1.21	0.35	1.52	0.28	1.72	0.4	1.09	0.16	0.97	0.14
	YJZ01-4-2		1.54	3.51	0.56	2.91	1.04	0.4	2.37	0.57	4.56	1.1	3.27	0.49	2.96	0.4
	YJZ01-6		0.7	1.5	0.19	0.92	0.32	0.12	0.72	0.22	1.83	0.49	1.54	0.24	1.48	0.2
	YDM01-06		0.89	1.68	0.15	0.46	0.07	0.03	0.09	0.04	0.14	0.03	0.1	0.02	0.17	0.02
	WGD01-04		2.7	2.91	0.7	3.32	0.71	0.19	0.84	0.16	0.84	0.19	0.52	0.08	0.46	0.06
	YJZ01-8-1	Aluminiferous siliceous rocks	17.44	40.09	5.78	22.14	3.82	0.84	4.09	0.76	5.19	1.18	3.63	0.58	3.79	0.52
	YJZ02-3		9.41	21.58	3.53	16.32	4.09	0.91	3.64	0.59	3.05	0.51	1.34	0.2	1.3	0.17
	JJY01-06		17.53	57.02	7.95	35.44	7.22	1.47	7.94	1.37	9.45	2.17	6.42	0.98	6.05	0.83
	YJZ01-1		18.96	31.32	4.68	18.92	3.75	0.85	4.02	0.73	5.07	1.19	3.75	0.64	4.52	0.66
	YJZ01-2	chert	0.74	0.9	0.2	1.12	0.47	0.16	1.13	0.25	1.86	0.49	1.48	0.23	1.41	0.21
	QZ01-03	chert	66.07	124.65	16.07	61.41	8.39	1.48	6.64	1.03	6.31	1.36	4.13	0.67	4.34	0.63
	YJZ01-7	calcarenite	5.45	11	1.58	6.2	1.15	0.25	1.14	0.23	1.44	0.32	1	0.17	1.03	0.15
	YJZ02-1	Dolomitic limestone	5.55	8.4	1.35	5.16	0.91	0.22	0.88	0.17	0.97	0.22	0.68	0.11	0.7	0.1
	YJZ02-5	Dolomitic arenaceous limestone	14.31	25.14	3.07	11.3	1.9	0.37	1.63	0.3	1.77	0.36	1.07	0.18	1.15	0.16
	YJZ02-6		19.57	36.03	4.31	15.92	2.62	0.46	2.08	0.34	1.86	0.36	1.05	0.17	1.16	0.17
	YJZ02-8		22.09	41.06	4.81	17.38	2.93	0.54	2.52	0.42	2.43	0.46	1.35	0.22	1.55	0.21
	HSM01-10	mudstone	12.84	36.95	5.99	24.75	4.06	0.72	2.92	0.43	2.08	0.38	1.03	0.16	1.04	0.15
	HSM01-11	Stone coal	6.33	24.73	4.12	19.07	3.67	0.6	2.83	0.46	2.74	0.6	1.82	0.3	1.99	0.28
	WGD01-03	mudstone	10.03	41.35	5.6	24.25	3.49	0.64	3.35	0.62	4.46	1.02	3.14	0.54	3.57	0.52
	ZH-1	chert	21.2	27.5	5.18	21.4	4.28	1.17	4.95	0.75	4.76	1.08	3.32	0.48	3.03	0.44	Hou, J.F., 2008. Characteristics and regularities of gold-vanadium mineralization in the lower Cambrian black rock series in the South Qinling Mountains. Northwestern University.
	ZH-2	chert	14.8	11.6	4.13	18.7	4.28	1.4	6.74	1.23	9.62	2.55	8.51	1.3	8.09	1.15
	PD4-1	Calcium siliceous slate	7.52	12.8	1.81	6.98	1.25	0.3	1.17	0.18	0.9	0.19	0.47	0.072	0.39	0.07
	PD4-2	chert	2.38	10.3	0.83	3.49	0.66	0.16	0.66	0.11	0.47	0.11	0.24	0.039	0.22	0.042
	PD4-3A	thin interbedded mud-silica slate	33.4	37.9	8.47	38.5	8.98	2.13	10.8	1.56	9.41	2.04	5.86	0.8	4.67	0.64
	PD4-4	Siliceous slate	2.37	1.83	0.71	3.23	0.61	0.14	0.76	0.13	0.68	0.18	0.47	0.07	0.39	0.067
	PD4-6	Siliceous slate	40.3	51.7	7.32	29.4	5.79	1.32	6.43	1.02	6.75	1.57	4.79	0.7	4.29	0.59
	PD4-7	argillaceous slate	38.9	45.1	7.63	29.3	5.18	1.53	5.41	0.77	4.6	1.02	2.98	0.43	2.68	0.41
	PD4-8	thin interbedded mud-silica slate	4.5	7.01	1.13	4.49	0.78	0.17	0.71	0.12	0.57	0.13	0.34	0.058	0.32	0.059
	X-PD5-CM2-2	chert	10.8	6.41	3.34	15.1	3.16	0.65	4.75	0.87	6.56	1.7	5.56	0.84	5.39	0.8
	X-PD4-3B	mudstone	20	40	4	16	2.8	1.9	2.7	0.7	2.8	0.8	1.8	0.4	2.6	0.4
	X-PD5-CM6-1	Stone coal	18	22	4	16	3	8.2	2.6	1	4	1.2	2.4	0.5	4	0.6
	X-TC36-1	Stone coal	22	23	5	23	4.9	18.5	3.3	1.2	7.2	2.1	4	1	8.4	1.4
	X-LS-1	chert	5	5	1	6	1.3	2	1	0	2.1	1	1.2	0	2.3	0.3
	X-LS-2	marl	19	34	3	13	2.4	20	2	0.5	2.2	0.6	1.4	0.4	4	1
	X-LS-5(2)	Vanadium ore	40	69	8	34	6.5	24	6	1	5.3	1	3.6	0.6	6.5	1.3
	X-GZ-1	Vanadium ore	7.3	9	1	6	1	4	1	0	1.2	0	0.9	0.3	1.7	0.3
	X-GZ-2(1)	Argillaceous slate	24	40	5	18	3.1	12	3.2	0.5	2.4	0.6	1.6	0.4	3.5	0.8
	X-GZ-2(2)	Argillaceous slate	20	31	4	14	3.1	9.9	3.3	0.7	2.1	0.5	1.6	0.3	2.8	1
	X-GZ-3	Argillaceous slate	32	48	6	21	3.4	4.8	3.7	0.6	3	0.8	2.1	0.4	2.8	0.4
	X-JS-4	Argillaceous slate	28	27	6	28	6.7	27	4.6	1.6	12	3.9	7.2	1.8	16	2.2
	X-JS-5	Argillaceous slate	64	114	14	55	8.5	39	8.7	1.5	8	2	5.1	0.8	9	1.8
	X-JS-6	Argillaceous slate	34.3	65	8	27	4.6	6	4	1	4	1	2.7	0.5	3.4	0.5
	X-WS-3	Siliceous slate	15.4	13	4	17	3.5	2	2	1	3.4	1	2.2	0.4	3.2	0.4
	X-WS-4	Vanadium ore	30	26	5	21	3.9	25.4	3.6	0.9	4.5	1.3	2.7	0.7	6.5	1.4
	X-WS-5	Siliceous slate	29.2	29	4	18	3	36.9	3.2	0.6	3	0.9	1.9	0.5	5.3	1.5
	X-WS-6	Argillaceous slate	20.6	24	4	10	2	1.3	1.7	0.4	1.9	0.5	1.2	0.3	1.6	0.3
	X-XL-2	Carbonaceous silicalite	5.6	7	1	6	1.3	10.6	0.9	0.4	1	0.2	0.6	0.2	1.7	0.4
	X-XL-4	chert	6.6	4	1	7	1	29	1	0	0.6	0	0.3	0.2	1.4	0.5
	X-XL-6	Carbonaceous silicalite	16.4	31	4	14	2.5	14.2	2.6	0.4	1.8	0.5	1.3	0.3	2.1	0.4
	X-XL-7	Siliceous slate	16	23	3	12	2.2	5	2	1	2.1	1	1.3	0.3	2.1	0.4
	B9	Argillaceous slate	10.4	12	2	10	1.5	30.5	2	0	0.7	0.2	0.6	0.3	3.4	1.3
	B10	chert	4.1	6	1	5	1	3	1	0	1.7	0	0.9	0.3	1.8	0.3
Foping Group	FP--2	Granulite	13.2	28.5	2.86	11	2.1	0.51	1.89	0.27	1.66	0.34	1.01	0.16	1.04	0.17	Liu, D.X., Liu, Y.J., 2016. Mineralogical and geochemical characteristics of Foping granulites in South Qinling and their tectonic implications. Global Geology 35, 441-449.
	FP--3		11.4	25.1	2.54	9.67	1.7	0.49	1.71	0.26	1.7	0.39	1.22	0.2	1.32	0.21
Changjiaoba Group	Pm012/12XT	Plagioclase gneiss	55.8	119	13.4	56.5	9.66	2.09	9.23	1.16	7.07	1.24	3.05	0.35	1.87	0.27	Li, W.J., Peng, H.L., Ren, J.G., Wang, J.A., Lv, J.L., Du, B., 2016. Geological characteristics and tectonic significance of Huojianbian gneiss and schist in Ningshan County, Shaanxi Province. Western Resources 2, 115-117+121.
	Pm012/21XT		35.4	83.9	8.18	33.8	5.71	1.17	5.66	0.77	4.57	0.87	2.68	0.36	2.29	0.33
	Pm012/24XT		37.3	80.5	8.49	35.1	5.96	1.25	5.84	0.83	4.83	0.9	2.76	0.38	2.49	0.39
	Pm012/109XT		42.6	79	8.61	36.5	6.35	1.32	5.84	0.83	4.98	1.04	2.92	0.46	2.85	0.38
	D537/1XT		40.1	86.5	8.52	36.1	6.35	1.32	6.29	0.78	5.33	0.95	2.94	0.41	2.95	0.45
	Pm012/101XT		37.8	77.1	7.87	32.9	5.79	1.31	5.15	0.71	4.29	0.86	2.73	0.4	2.7	0.4
	Pm012/102XT		44.1	92.3	9.19	38.4	6.54	1.39	6.41	0.86	5.36	1.02	2.95	0.4	2.59	0.36
	Pm012/23XT		39.6	83	8.64	35.4	6.22	1.2	5.93	0.84	5.08	0.97	3.02	0.4	2.62	0.39
	Pm012/30XT	Biotite plagioclase gneiss	46	93.4	9.5	39.4	6.97	1.42	6.63	0.89	5.45	1.05	3.21	0.45	2.95	0.42
Nantuo Formation	NT0601	tillite	29.5	59.8	7.16	27.8	5.48	1.04	4.53	0.7	4.58	1.07	3.55	0.64	4.8	0.8	Hu, R., Li, S.Q., Wang, W., Chen, F.K., 2016. Source characteristics of tillite the Nantuo Formation in Three Gorges, Northern Yangtze Block: Evidences from zircon ages and geochemical composition. Earth Science 41, 1630-1654.
	NT0602		16.5	26	3.3	11.2	2.18	0.39	1.58	0.22	1.24	0.23	0.7	0.11	0.73	0.11
	NT0603		63.2	121	13.2	42.3	5.5	1.08	4.22	0.54	3.41	0.73	2.37	0.38	2.58	0.4
	NT0604		31.1	49.2	7.17	27.2	5.07	1.03	4.21	0.62	3.54	0.68	1.91	0.28	1.86	0.29
	NT0608		24.7	51.7	6.19	25	5.15	1.57	4.59	0.73	4.51	0.96	2.86	0.45	3.04	0.5
	NT0609		25.2	50.2	6.2	24.6	5.25	1.16	4.53	0.74	4.59	0.95	2.76	0.44	2.88	0.45
	NT0610		15	27.9	2.85	9.83	1.75	0.64	1.38	0.17	0.88	0.16	0.47	0.07	0.45	0.07
	NT0611		12.5	28.9	3.79	15.7	3.54	0.77	3.16	0.56	3.53	0.77	2.27	0.36	2.41	0.39
	NT0612		47.2	83.5	10.4	36.6	5.76	1.29	4.1	0.5	2.56	0.43	1.23	0.17	1.15	0.17
	NT0613		35.3	70.2	8.2	31.2	6.09	1.31	5.21	0.82	4.97	1	2.91	0.46	2.96	0.46
Lujiaping Formation	1	shale	33.01	61.66	7.79	31.01	5.82	1.01	5.66	0.93	5.4	1.1	3.11	0.45	2.97	0.45	Ling, S.X., Wu, X.Y., Ren, Y., Li, X.N., Wang, G.G., 2015. Analysis of REE geochemical characteristics and sedimentary environment of the Early Cambrian black rock strata in Daba Mouontain. Geological Science and Technology Information 34, 31-37.
	2		33.96	58.5	7.27	28.48	5.2	0.78	4.99	0.84	4.98	1.08	3.18	0.48	3.21	0.49
	3		26.48	45.19	6.58	25.04	5.02	0.84	5	0.8	4.71	1.06	2.96	0.45	2.78	0.42
	4		24.88	29.34	4.97	20.44	4.18	0.43	5.4	0.78	4.78	1.09	3.07	0.45	2.47	0.38
	5		55.55	58.37	13.23	55.4	11.58	2.44	14.81	2.43	15.56	3.67	10.5	1.59	9.27	1.46
	6		33.29	32.42	7.12	27.78	5.36	1.07	6.24	1.03	6.62	1.57	4.61	0.68	3.99	0.64
	7	chert	32.45	41.73	6.74	27.77	6.13	2.19	6.94	1.08	7.4	1.62	5.19	0.76	4.79	0.71
	8		12.4	12	3.13	13.9	2.69	0.51	2.85	0.43	2.99	0.81	2.37	0.34	2.15	0.33
	06XP1-9	chert	18.96	44.53	5.75	26.71	6.13	2.18	9.16	1.01	5.87	1.14	3.1	0.4	2.56	0.36	Ding, M.H., 2008. Cambrian Ordovician stratigraphic characteristics and their determination in Xunyang Baihe area, South Qinling. Chang'an University.
	06XP1-18	carbonaceous siliceous rocks	12.01	16.55	2.15	8.68	1.86	1.57	3.68	0.51	3.79	0.89	2.84	0.39	2.52	0.35
	06XP1-14	carbonaceous siliceous rocks	2.07	3.43	0.48	2.14	0.4	0.18	0.47	0.05	0.39	0.09	0.3	0.04	0.37	0.06
	06XP1-34	carbonaceous siliceous rocks	2.64	4.7	0.61	2.77	0.55	0.23	0.69	0.1	0.67	0.15	0.48	0.07	0.48	0.08
	P3-32WL1	carbonaceous siliceous rocks	5.11	9.81	1.14	4.78	1	0.48	1.07	0.15	1.04	0.24	0.87	0.13	0.98	0.16
	A-HP-1	carbonaceous siliceous rocks	25.6	38.8	7.7	32.7	8.4	4.4	11.2	1.6	10	2.1	5.6	0.8	5.2	0.8	Wang, L.S., Geological geochemistry and metallogenic regularity of black rock series and its typical deposits in Qinling, Shaanxi Province. Northwestern University,
	A-HP-2	carbonaceous siliceous rocks	8.3	12.5	2.3	7.9	1.4	2.5	2.1	0.2	1.4	0.3	0.8	0.1	1.1	0.2
	A-LYS-1	vanadium ore	25.2	36.8	7.5	31.3	6.9	2.9	9.1	1.4	8.9	2	5.4	0.8	4.9	0.8
	A-LYS-3	carbonaceous siliceous rocks	34	73.3	8.9	31.2	6.3	2	7.8	1.1	6.9	1.5	4	0.7	4.6	0.9
	A-LYS-4	vanadium ore	40.9	56	10.9	44.2	9.3	3	12	1.8	11.6	2.7	7.4	1.1	6.8	1.1
	A-Z-DH-12	stone coal	32.5	46.3	8.4	31.6	6.4	2.2	8.3	1.2	7.5	1.7	4.5	0.7	4.5	0.7
	QL3-12-1		23.3	49.1	5.58	22.4	4.22	1	3.98	0.58	3.25	0.66	1.94	0.31	2.08	0.33
	DBS275-1		19.11	34.74	3.65	13.09	2.24	0.59	1.76	0.26	1.5	0.33	0.93	0.15	1.05	0.17
	DBS278-2		21.92	42.88	4.69	17.26	3.15	0.8	2.81	0.44	2.71	0.58	1.71	0.28	1.93	0.31
	QL8-4-4	Granitoids	19	26.6	4.48	16.7	3.44	0.71	3.39	0.53	3.22	0.69	2.19	0.31	2.29	0.36
	QL8-4-5		19.5	33.4	4.52	17	3.58	0.66	3.49	0.62	3.59	0.78	2.49	0.38	2.57	0.42
	QL9-1-1		18.7	24.7	3.29	11.8	2.12	0.33	2.04	0.35	2.03	0.45	1.53	0.22	1.56	0.25
	QL9-1-2		24.4	45.2	4.85	18.2	3.29	0.51	3.46	0.56	3.34	0.69	2.12	0.36	2.44	0.4
	XQL11-4-1		17.5	39.4	4.98	21.6	5.47	1.18	6.08	1.23	7.06	1.66	4.77	0.73	5.04	0.75
	XQL11-4-2		19.3	40.5	5.55	23.7	6.22	1.29	7.69	1.41	8.84	1.93	6.06	0.88	5.62	0.87
	XQL9-17-1		22	44.3	4.46	16.6	3.22	0.74	3.56	0.51	3.27	0.71	2.07	0.35	2.36	0.36
	XQL9-17-3		22.3	39.8	4.56	16.6	3.11	0.75	3.01	0.55	2.99	0.7	2.09	0.34	2.29	0.38
	XQL16-11-2		23.2	36.3	5.14	19.3	3.66	0.95	3.34	0.65	3.42	0.82	2.38	0.4	2.76	0.43
	XQL16-11-3		23.2	43	5.34	20.3	4	0.93	3.77	0.67	4.02	0.85	2.82	0.39	2.67	0.47
	XQL13-5-1		33.4	66	7.93	33.2	6.18	1.24	5.42	0.96	5.19	1.07	3.28	0.47	3.17	0.5
	XQL13-5-2		24.2	44	5.92	25.3	4.97	1.1	4.77	0.89	4.9	0.97	2.85	0.39	2.69	0.44
	XQL11-8-1		23.4	54.9	6.57	28	7.14	1.36	8.49	1.66	10.1	2.43	6.61	1.03	6.75	0.99
	XQL11-8-2		18.7	43.8	5.63	25.4	6.8	1.21	8.88	1.55	10.2	2.28	6.83	1.11	6.98	1.06
	QL8-1-1	granite	56.8	108	13.9	54.6	11.7	2.42	11.8	2.02	12.1	2.37	6.99	0.92	5.88	0.86
	QL8-1-2		52.9	100	13	51.3	11	2.31	11.1	1.86	10.6	2.06	5.98	0.79	5.22	0.76
	QL8-1-3		80.6	174	20.3	85.6	17.3	4.7	18	2.68	16	3.13	8.85	1.4	8.59	1.37
	QL8-1-4		88.6	182	22	87.8	18.8	4.99	18	3.11	17.2	3.38	9.98	1.37	8.49	1.34
	QL8-1-6		74.9	158	18.1	71.6	15.5	3.13	15.5	2.8	16.1	3.21	9.74	1.31	8.23	1.25
	QL8-1-7		76.8	156	18.5	73.1	15.7	3.21	15.6	2.72	15.5	3.08	9.04	1.24	7.66	1.15
	QL14-1-1	granite	75.3	151	19.3	75.5	17.6	3.35	17.6	3.16	17.7	3.59	10.3	1.46	8.82	1.4
	QL14-1-2		75.6	156	19.1	75.9	16.8	3.01	16.9	3.04	17.5	3.57	10.5	1.46	8.94	1.4
	QL14-1-3		78.9	154	19.9	79.2	17.9	3.48	18.7	3.24	18.2	3.7	11	1.48	9.27	1.42
	QL14-1-4		73.7	159	17.9	70.4	15.8	2.72	15.9	2.75	16	3.18	9.52	1.33	8.69	1.33
	QL13-2-1	syenite	65.3	139	16.5	66.7	13.6	5.32	13.3	2.06	11.9	2.29	6.84	0.88	5.95	0.94
	QL13-2-2		57.6	103	14.8	63.4	13.8	4.53	12.6	2.05	12.7	2.34	6.92	1.03	6.46	1.03
	QL13-2-3		67.1	143	17	67.3	13.7	5.39	13.6	2.12	11.9	2.24	6.63	0.87	5.74	0.94
	QL13-2-4		67.7	133	16.8	67.8	14	4.98	13.6	2.14	12.1	2.33	7.16	0.92	6.12	0.94
	XQL16-2-1		71.5	149	17.5	69.9	14.6	5.65	13.7	2.34	11.8	2.52	6.73	0.97	6.56	1.04
	XQL16-2-2		50.2	91.2	12.8	55.8	12.4	4.76	11.3	1.81	11.5	2.22	6.16	0.92	6.11	1.01
	XQL16-2-3		62.5	137	15.8	66.7	13.5	5.24	14.6	2.07	11.9	2.33	6.42	0.99	6.47	1
	QL13-3-1	monzonite	60.4	124	14.3	55.8	11.4	2.72	10.9	1.74	9.46	1.77	4.98	0.62	4.05	0.58
	QL13-3-4		58.5	121	13.9	54.5	11.1	2.7	11.1	1.72	9.55	1.75	4.98	0.62	3.94	0.59
	CK-2	basic volcanic rocks	12.9	27.37	3.77	16.93	3.85	1.21	3.43	0.6	3.74	0.86	2.22	0.35	2.63	0.41	Yang, Z., 2008. Geochemical characteristics and tectonic significance of Mesozoic Neoproterozoic basement volcanic rocks in the middle part of South Qinling Orogen. Northwestern University.
	CK-4		11.67	23.93	3.13	13.05	2.82	0.89	2.5	0.44	2.67	0.62	1.62	0.26	1.96	0.31
	CK-5		13.66	29.71	4.04	17.76	4.06	1.29	3.72	0.65	4	0.93	2.39	0.38	2.86	0.44
	CK-7		10.53	23.74	2.99	13.02	3.01	0.97	2.85	0.5	3.12	0.74	1.9	0.3	2.3	0.36
	CK-8		11.08	25.15	3.15	13.84	3.23	1.05	3.08	0.55	3.45	0.81	2.12	0.34	2.55	0.41
	CK-11		20.53	44.19	5.9	24.47	5.42	1.71	4.88	0.85	5.21	1.18	3.04	0.48	3.63	0.58
	CK-12		9.8	26.47	2.96	13.22	3.14	1.01	2.98	0.54	3.36	0.8	2.06	0.33	2.49	0.39
	CK-14		10.48	22.63	3.18	14.02	3.33	1.08	3.17	0.56	3.52	0.82	2.1	0.33	2.42	0.38
	Y1-2	basic volcanic rocks	3.86	9.85	1.58	8.22	2.65	0.9	2.79	0.57	3.77	0.91	2.23	0.34	2.49	0.38
	Y1-5		3.4	9.25	1.53	8.01	2.54	0.86	2.69	0.53	3.42	0.8	1.96	0.3	2.23	0.33
	Y1-6		4.44	11.06	1.64	8.45	2.71	1.03	3.19	0.62	3.89	0.88	2.25	0.33	2.17	0.37
	Y1-7		4.36	9.59	1.43	7.04	2.06	0.7	2.17	0.43	2.75	0.65	1.64	0.26	1.93	0.31
	Y1-8		3.6	9.66	1.6	8.36	2.68	0.9	2.78	0.55	3.56	0.84	2.07	0.32	2.29	0.35
	Y1-9		3.39	9.49	1.56	8.26	2.59	0.87	2.72	0.55	3.49	0.83	2.04	0.31	2.29	0.35
	Y1-10		3.46	9.19	1.52	7.98	2.54	0.85	2.63	0.53	3.51	0.82	2	0.31	2.22	0.34
	Y1-12		4.6	11.44	1.75	8.62	2.61	0.88	2.72	53	3.49	0.81	1.97	0.3	216	0.34
	T-001	basalt	45.1	99	12.6	48.8	10.5	2.8	9.7	1.52	8.72	1.85	4.85	0.73	4.71	0.7
	T-002		22.8	51.9	6.8	30.9	7.63	2.12	7.83	1.34	8.2	1.77	4.48	0.67	4.4	0.73
	T-003		21.7	49.9	6.4	30.2	7.41	1.85	7.56	1.34	7.68	1.69	4.44	0.66	4.45	0.68
	C-002	diabase	18	39.8	5.06	22.2	5.37	1.52	5.51	0.94	5.61	1.2	3.09	0.46	3	0.51
	C-005		18.1	40.3	5.34	24.1	5.5	1.66	5.35	0.86	4.85	1.03	2.59	0.38	2.47	0.42
	C-008		23.7	53.7	7.11	32.9	8	2.46	8.32	1.4	8.1	1.73	4.3	0.62	4.01	0.67
	C-011		13.21	31.8	4.46	21.5	5.67	1.86	5.97	1.04	6.26	1.38	3.46	0.52	3.42	0.57

## Sheet: S4
Group	sample number	lithotype	La	Ce	Pr	Nd	Sm	Eu	Gd	Tb	Dy	Ho	Er	Tm	Yb	Lu	Reference
Yudongzi Group	XVLY-8	TTG	17.6028	28.9921	2.44502	8.50551	1.22911	0.74492	0.9132	0.106159	0.473261	0.0874089	0.251333	0.036122	0.224288	0.0403704	Chen, Q., Sun, M., Zhao, G., Zhao, J., Zhu, W., Long, X., Wang, J., 2019. Episodic crustal growth and reworking of the Yudongzi terrane, South China: Constraints from the Archean TTGs and potassic granites and Paleoproterozoic amphibolites. Lithos 326-327, 1-18.
	XVILY-5-1		24.1465	43.2878	4.25983	14.9282	2.38089	1.23694	1.88125	0.226027	1.16917	0.20903	0.526035	0.0680675	0.400445	0.0625688
	XVILY-5-2		22.5527	37.6994	3.84175	12.9624	1.99716	0.808954	1.60016	0.191021	1.00078	0.175792	0.450379	0.0579055	0.366194	0.0588032
	XVILY-5-3		24.0613	42.1701	4.52746	16.057	2.81874	1.0234	2.2028	0.278516	1.52536	0.267216	0.675753	0.0861149	0.521859	0.0756157
	XVILY-5-4		24.2753	42.8886	4.62175	16.6662	2.88986	1.04932	2.27345	0.291195	1.54337	0.27157	0.690364	0.089151	0.503206	0.0745753
	XVILY-5-5		24.0421	42.7356	4.35805	15.3278	2.50063	1.12342	1.9473	0.238528	1.27281	0.229	0.572512	0.0756048	0.458381	0.0690048
	XVLY-4		15.4031	26.5857	2.38522	8.78994	1.61128	0.552607	1.20295	0.127283	0.527765	0.08159	0.204908	0.0241184	0.13912	0.0222549
	XVILY-6-1		2.84766	4.08833	0.395699	1.26568	0.191407	0.502658	0.163109	0.0211596	0.12019	0.0240569	0.0699897	0.0135071	0.0849452	0.0136917
	XVILY-6-2		1.93717	2.69891	0.240275	0.721495	0.0847858	0.235906	0.0536044	0.00614441	0.0348819	0.00696305	0.0217116	0.00417813	0.0291924	0.00594123
	XVILY-6-3		2.28131	3.0805	0.271697	0.779864	0.0942654	0.287223	0.0574079	0.00586087	0.0300037	0.00569786	0.0164298	0.00344507	0.0243165	0.00423856
	XVILY-6-4		1.475	2.4037	0.249612	0.788783	0.145427	0.230682	0.108623	0.0119915	0.0723033	0.0150114	0.0467789	0.00954734	0.0709508	0.0123534
	XVILY-6-5		1.27957	2.11753	0.223039	0.712826	0.124762	0.177618	0.0732655	0.0083778	0.0407631	0.00927358	0.0294515	0.00575797	0.0485814	0.00846809
	XVILY-6-6		2.8738	3.54917	0.300347	0.851138	0.0930471	0.537602	0.0574326	0.00711945	0.0370952	0.00727945	0.0202769	0.00390556	0.0302617	0.00502419
	XVILY-8-1		51.9917	96.0237	8.93988	26.7101	3.14954	0.724972	1.72336	0.247291	1.45825	0.273737	0.700764	0.0920492	0.489537	0.057004
	XVILY-8-2		42.7604	73.3194	7.35982	21.5574	2.39051	0.509756	1.22147	0.17594	1.00132	0.195217	0.546936	0.0828284	0.491697	0.0651526
	XVILY-8-3		32.9898	58.3369	5.48689	16.5202	1.8242	0.428893	0.962012	0.137391	0.809432	0.158837	0.449212	0.067082	0.401348	0.0525467
	XVILY-8-4		34.6455	63.254	6.2455	19.3144	2.3432	0.511944	1.1628	0.146575	0.774849	0.135991	0.374156	0.0500855	0.305787	0.037375
	XVILY-8-5		23.1328	41.9803	3.67667	11.1673	1.24481	0.295354	0.661801	0.0889039	0.509169	0.0983226	0.270915	0.0388359	0.224724	0.0284179
	XVILY-8-6		47.0076	79.683	8.21571	24.4169	2.86693	0.714045	1.55141	0.21006	1.10038	0.194221	0.557333	0.0838879	0.523944	0.0720557
	XVLY-3		32.2206	69.3188	8.11774	35.4629	6.99385	1.83892	6.12747	0.78784	3.84338	0.688417	1.81885	0.245427	1.38929	0.212305
	XVLY-6		8.92845	16.626	1.58719	6.32861	1.48559	0.379631	1.56229	0.246312	1.54346	0.338095	1.05227	0.175333	1.12472	0.194907
	XVLY-7		5.39311	10.27	1.00557	4.12045	1.07331	0.360448	1.11671	0.172782	1.00949	0.210367	0.639137	0.097674	0.59814	0.101509
	16YDZ‐01	granitoid gneiss	15.1	25	2.63	9.14	1.37	0.47	1.13	0.132	0.673	0.119	0.321	0.045	0.298	0.049	Hui, B., Dong, Y., Zhang, F., Sun, S., Liu, X., Cheng, C., He, D., 2019. Geochronology and geochemistry of ca. 2.48 Ga granitoid gneisses from theYudongzi Complex in the north‐westernYangtze Block, China. Geological Journal 54, 879-896.
	16YDZ‐02		20.7	34.1	3.15	10.7	1.62	0.488	1.35	0.151	0.732	0.123	0.309	0.041	0.25	0.041
	16YDZ‐03		12.5	22.4	2.22	7.68	1.21	0.455	1.02	0.12	0.61	0.105	0.275	0.038	0.247	0.042
	16YDZ‐04		11.4	17.6	1.96	6.86	1.08	0.426	0.952	0.115	0.593	0.104	0.267	0.036	0.239	0.041
	16YDZ‐05		13.3	22.2	2.27	7.94	1.27	0.458	1.03	0.125	0.636	0.109	0.283	0.037	0.228	0.036
	16YDZ‐06		28.6	43.6	4.08	13.5	1.64	0.802	1.34	0.146	0.783	0.142	0.401	0.055	0.356	0.053
	16YDZ‐07		24.9	49.4	5.57	21.6	3.7	0.977	3.05	0.372	1.94	0.341	0.918	0.125	0.776	0.111
	16YDZ‐08		15.8	29.4	3.29	13.2	2.49	0.598	2.08	0.288	1.66	0.319	0.906	0.134	0.862	0.127
	16YDZ‐09		18.3	29.5	3.42	12.6	2.08	0.659	1.71	0.206	1.11	0.202	0.556	0.08	0.529	0.08
	16YDZ27	Gneiss	11.4	21.5	2.22	7.76	1.3	0.52	1	0.13	0.69	0.13	0.37	0.04	0.29	0.05	Zhou, G., Wu, Y., Li, L., Zhang, W., Zheng, J., Wang, H., Yang, S., 2018. Identification of ca. 2.65 Ga TTGs in the Yudongzi complex and its implications for the early evolution of the Yangtze Block. Precambrian Research 314, 240-263.
	16YDZ26		27	60.8	6.43	21	3.63	0.43	2.84	0.42	2.09	0.37	0.99	0.11	0.71	0.11
	16YDZ20		21.3	37.4	3.93	14.1	2.34	0.85	1.7	0.23	1.24	0.21	0.63	0.07	0.41	0.07
	16YDZ17		20.8	36.2	3.61	13.3	2.25	0.86	1.81	0.22	1.11	0.23	0.59	0.07	0.49	0.07
	16YDZ09	Leucogranite	9.58	9.63	0.65	1.62	0.12	0.67	0.11	0.01	0.07	0.01	0.04	0.01	0.05	0.01
	16YDZ24		10.3	13.3	1.15	3.25	0.34	0.41	0.18	0.02	0.07	0.01	0.04	0.01	0.03	0.01
	YDZ-01	TTG gneiss	53	88.8	8.18	25.2	2.6	0.736	1.66	0.131	0.494	0.067	0.195	0.024	0.169	0.03	Hui, B., Dong, Y., Cheng, C., Long, X., Liu, X., Yang, Z., Sun, S., Zhang, F., Varga, J., 2017. Zircon U–Pb chronology, Hf isotope analysis and whole-rock geochemistry for the Neoarchean-Paleoproterozoic Yudongzi complex, northwestern margin of the Yangtze craton, China. Precambrian Research 301, 65-85.
	YDZ-03		20.5	31.9	2.74	8.75	1.06	0.77	0.828	0.088	0.427	0.077	0.226	0.032	0.231	0.038
	YDZ-06		8.92	10.5	0.77	2.1	0.24	0.832	0.277	0.046	0.388	0.111	0.438	0.088	0.726	0.137
	YDZ-09		8.35	8.88	0.63	1.68	0.162	0.601	0.167	0.018	0.115	0.031	0.113	0.023	0.178	0.033
	YDZ-19		35.7	76.1	9.36	38.4	7.28	2.12	6.28	0.854	4.6	0.849	2.24	0.299	1.78	0.263
	YDZ-20	Amphibole plagiogneiss	51.9	109	13.3	53.2	9.77	2.61	8.44	1.14	6.26	1.15	3.12	0.422	2.52	0.368
	YDZ-21		32.9	68	8.74	37.7	7.53	2.31	6.62	0.882	4.64	0.84	2.15	0.275	1.61	0.235
	YDZ-22		26.7	58	7.46	32.6	6.58	2.02	5.8	0.779	4.16	0.75	1.91	0.245	1.43	0.214
	YDZ-23		27.8	58.7	7.03	28.1	5.73	1.67	5.61	0.839	4.89	0.97	2.77	0.407	2.57	0.398
Bikou Group	12HCG-33	basalt	2.12	6.09	1.17	6.82	2.43	0.93	1.54	0.53	5.17	1.05	2.58	0.54	3.4	0.51	Wu, J., Liu, J.J., Li, J.X., Jia, L., Liu, C.H., Yang, S.S., Wang, L.X., She, K.W., Li, Z.G., 2014. LA-ICP-MS zircon U-Pb dating and petrogenesis of the Bikou basalt in Huachanggou area, South Qinling. Geology in China 41, 1341-1355.
	12HCG-35		1.72	5.53	1.15	7.19	2.8	1.05	1.7	0.6	6.01	1.24	3.03	0.63	3.95	0.58
	12HCG-38		1.71	5.47	1.21	7.47	3.04	1.21	1.83	0.66	6.7	1.4	3.46	0.73	4.64	0.72
	BKE08	IAB	35.6	74.8	8.36	33.2	8.33	2.46	9	1.51	8.94	2.02	6.71	0.9	6.05	0.8	Li, Y., Lai, S., Qin, J., Liu, X., Wang, J., 2007. Geochemical characteristics of Bikou volcanic group and Sr-Nd-Pb isotopic composition: Evidence for breakup event in the north margin of Yangtze plate, Jining era. Science in China Series D: Earth Sciences 50, 339-350.
	BKL19	OIB	58.8	121	14.9	57.2	10.9	3.71	9.68	1.44	7.22	1.23	3.45	0.41	2.68	0.36
	BKE04	MORB	6.73	17.5	2.88	16.6	6.57	1.83	7.13	1.46	9.76	2.29	7.37	0.99	6.61	0.89
	BKE06		3.57	9.73	1.39	7.61	2.65	0.98	2.91	0.6	3.92	0.83	2.34	0.29	2.11	0.32
	BKE10		11.1	29.6	4.4	21.8	7.16	1.93	7.64	1.55	9.81	2.12	6.81	0.96	6.75	0.91
	BKL01		5.47	14	2.07	10.6	3.23	1.09	3.47	0.73	4.9	1.04	2.97	0.39	2.95	0.42
	BKL06		3.58	9.82	1.56	8.24	2.52	0.91	2.77	0.59	4.06	0.89	2.49	0.33	2.46	0.38
	BKL08		2.93	7.52	1.2	5.85	1.98	0.72	2.49	0.54	3.67	0.78	2.51	0.35	2.44	0.36
	BKL13		4.72	12	1.73	8.84	3.16	1.32	3.91	0.74	4.71	1.14	3.9	0.54	3.58	0.48
	BKL23		6.06	16.5	2.48	11.6	3.5	1.46	4.44	0.92	5.83	1.19	3.6	0.54	4.03	0.56
	BKL26		3.74	10.5	1.61	9.35	3.22	1.13	2.96	0.65	4.77	1.11	3.38	0.39	2.86	0.42
	BKL33		5.04	13	1.99	10.2	3.22	1.17	3.63	0.68	4.06	0.86	2.56	0.34	2.27	0.32
	BKL37		7.28	18.9	3.24	17.8	6.4	1.78	6.81	1.36	8.64	1.78	5.2	0.63	4	0.59
	BKL43		8.13	20.9	3.21	16.8	5.58	2	5.79	1.15	7.38	1.67	5.23	0.65	4.25	0.6
	BKL30		7.2	15.6	2.09	10.1	3.18	1.2	3.17	0.56	3.64	0.8	2.51	0.29	1.84	0.27
	(GPH04)		4.65	11.4	1.77	10.8	3.03	1.07	3.65	0.73	4.77	1.11	2.94	0.48	3.19	0.46
	(GPH05)		7.53	18.3	2.84	15.2	3.85	1.33	4.01	0.71	3.98	0.81	1.99	0.3	1.9	0.28
	(GPH06)		3.3	8.96	1.48	9.6	2.64	0.97	3.08	0.61	3.86	0.87	2.3	0.36	2.35	0.34
	DJH14	Metaperidotite	0.03	0.08	0.01	2.03	0.03	0.01	0.04	0.01	0.07	0.02	0.05	0.01	0.06	0.05	Lai, S., Li, Y., Qin, J., 2007. Geochemistry and LA-ICP-MS zircon U-Pb dating of the Dongjiahe ophiolite complex from the western Bikou terrane. Science in China Series D: Earth Sciences 50, 305-313.
	DJH14		0.26	0.59	0.1	2.44	0.19	0.47	0.25	0.05	0.3	0.07	0.18	0.03	0.2	0.06
	DJH14		0.02	0.08	0.02	2.01	0.04	0.01	0.05	0.01	0.08	0.02	0.05	0.01	0.06	0.05
	DJH04		8.63	20	3.12	16	3.97	1.27	3.82	0.63	3.43	0.66	1.59	0.23	1.43	0.21
	DJH05	Gabbros	7.87	18.3	2.72	14.7	3.56	1.1	3.5	0.58	3.24	0.63	1.53	0.22	1.35	0.2
	DJH11		11.1	23.2	3.41	16.6	3.93	1.21	4.22	0.74	4.41	0.98	2.57	0.41	2.68	0.39
	DJH22	Metabasalts	5.54	15.1	2.4	13.8	3.41	1.13	3.25	0.54	2.88	0.58	1.41	0.21	1.29	0.2
	DJH24		4.33	12.3	2.04	12.2	3.07	1.05	2.95	0.49	2.67	0.53	1.29	0.18	1.15	0.18
	DJH25		1.97	8.15	1.85	13.8	4.4	1.25	4.23	0.74	4.05	0.79	1.84	0.25	1.5	0.21
	DJH31		8.69	23.1	3.8	20.6	5.88	1.89	6.2	1.16	6.93	1.5	3.92	0.61	3.94	0.55
	DJH36		10	22.6	3.42	17.9	4.61	1.58	4.91	0.9	5.23	1.13	2.96	0.46	2.96	0.42
	DJH37		10.9	27.7	4.06	21.3	5.89	2.11	6.4	1.19	7.22	1.57	4.2	0.66	4.35	0.62
	DJH40		10.4	24.7	3.67	18.9	4.92	1.72	5.21	0.94	5.52	1.17	3.04	0.46	3.03	0.44
	DJH41		12	31.4	4.27	21.7	5.8	1.98	6.07	1.12	6.38	1.35	3.49	0.53	3.48	0.49
	DJH45		12.6	30	4.19	20.9	5.34	1.71	5.56	1	5.85	1.22	3.15	0.49	3.14	0.45
	Gky1	mafic-intermedaite intrusive rocks	16	38	5.34	22.67	5.18	1.36	5.1	0.9	5.17	1.04	2.86	0.43	2.7	0.44	Xiao, L., Zhang, H., Ni, P., Xiang, H., Liu, X., 2007. LA-ICP-MS U–Pb zircon geochronology of early Neoproterozoic mafic-intermediat intrusions from NW margin of the Yangtze Block, South China: Implication for tectonic evolution. Precambrian Research 154, 221-235.
	Gky2		8	19	3.04	13.53	3.22	1.3	3.19	0.5	2.78	0.54	1.37	0.2	1.14	0.19
	Gky		9	21	3.32	14.78	3.52	1.42	3.48	0.55	3.03	0.59	1.5	0.21	1.24	0.21
	Gky3		10	23	3.88	16.76	3.97	1.5	3.89	0.67	3.96	0.67	1.74	0.28	1.59	0.22
	Pts2		13	26	3.2	11.39	2.22	0.66	1.95	0.37	2.07	0.41	1	0.16	0.84	0.15
	Pts2-1		15	30	3.74	13.33	2.6	0.77	2.28	0.43	2.43	0.49	1.17	0.18	1	0.17
	Pts3		12	24	3.1	10.91	2.08	0.66	1.85	0.35	1.91	0.37	0.92	0.14	0.78	0.13
	Pts4		14	31	3.63	16.89	3.65	0.96	3.06	0.52	3.07	0.61	1.4	0.2	1.51	0.23
	Ljp-2		15	35	5.22	21.95	5.27	1.4	5.06	0.87	5.14	1.03	2.8	0.41	2.55	0.4
	Ljp3		15.71	36.07	5.44	22.89	5.5	1.45	5.27	0.91	5.36	1.08	2.92	0.43	2.66	0.42
	Ljp5		14.57	31.38	4.73	19.92	4.78	1.25	4.59	0.79	4.66	0.94	2.54	0.37	2.32	0.36
	Ljp7		12.05	27.66	4.17	17.56	4.22	1.16	4.05	0.7	4.11	0.83	2.24	0.33	2.04	0.32
	BK226	meta-basalt	0.32	1.08	0.22	1.52	0.59	0.19	0.8	0.11	0.71	0.13	0.37	0.06	0.4	0.07	Li, Y.F., Lai, S.C., Qin, J.F., Liu, X., Wang, J., 2006. The further study on geochemical characteristics and petrogenesis of the bininitic rocks from Bikou Group, Northern Yangtze Plate. Journal of East China Institute of Technology 29, 43-48.
	BK228		36	174	43	257	90	32	171	28	177	36	87	14	87	136
	2000174	lavas	5.226	15.8	2.526	12.6	3.913	1.365	5.055	0.921	5.499	1.177	3.101	0.465	3.01	0.454	Quanren, Y., Zongqi, W., HANSON, A.D., DRUSCHKE, P.A., Zhen, Y., Dunyi, L., Ping, J., Biao, S., Tao, W., Chunfa, J., 2003. SHRIMP Age and Geochemistry of the Bikou Volcanic Terrane: Implications for Neoproterozoic Tectonics on the Northern Margin of the Yangtze Craton. Acta Geologica Sinica - English Edition 77, 479-490.
	2000177		5.872	17.01	2.706	13.49	4.155	1.499	5.3	0.951	5.638	1.199	3.234	0.476	3.008	0.449
	2000199		10.46	27.87	4.01	18.79	5.047	2.065	5.756	0.992	5.609	1.105	2.847	0.415	2.676	0.397
	2000208		41.57	93.18	12.45	50.67	10.58	3.331	9.104	1.341	7.147	1.285	3.125	0.415	2.519	0.357
	2000209		13.43	36.47	5.393	24.21	6.308	1.854	6.284	1.029	5.427	1.013	2.516	0.345	2.198	0.312
	2000223		19.339	43.329	5.688	24.681	4.859	1.348	4.496	0.631	3.563	0.668	1.815	0.268	1.718	0.267
	2000224		20.968	47.342	6.42	28.462	5.694	1.643	5.194	0.746	4.004	0.766	2.089	0.308	1.899	0.292
	2000225		7.255	20.943	3.484	19.808	6.214	1.952	8.967	1.464	9.36	1.987	5.758	0.863	5.516	0.841
	2000226		0.319	1.076	0.221	1.523	0.585	0.192	0.804	0.109	0.714	0.133	0.372	0.064	0.397	0.065
	2000228		0.36	1.741	0.431	2.569	0.903	0.318	1.712	0.275	1.773	0.357	0.866	0.14	0.867	0.136
	2000230		0.175	0.947	0.248	1.645	0.572	0.179	1.097	0.156	1.068	0.194	0.501	0.084	0.551	0.092
	2000231		18.473	41.26	5.528	24.51	5.431	1.662	5.521	0.807	4.674	0.888	2.356	0.348	2.052	0.313
	1	Siliceous rocks	5.154	3.252	0.373	0.973	0.219	0.254	0.17	0.031	0.111	0.027	0.052	0.008	0.045	0.009	Ding, Z.J., Liu, C.Q., 1999. Geochemical characteristics of hydrothermal ferruginous silica rocks in Bikou Goup: Implications for ancient geofluid process. Acta Sedimentologica Sinica 17, 706-711.
	2		0.154	0.442	0.087	0.263	0.112	0.023	0.183	0.041	0.241	0.058	0.186	0.036	0.242	0.045
	3		1.058	0.682	0.231	0.924	0.306	0.11	0.365	0.069	0.459	0.108	0.308	0.053	0.294	0.05
	4		0.305	1.11	0.117	0.846	0.153	0.064	0.154	0.026	0.105	0.025	0.062	0.012	0.054	0.01
	5		0.736	1.319	0.215	0.869	0.311	0.107	0.474	0.092	0.516	0.119	0.28	0.039	0.191	0.03
	6		0.379	1	0.186	0.622	0.182	0.202	0.159	0.036	0.124	0.041	0.104	0.026	0.13	0.027
	pd224		0.151	0.442	0.087	0.263	0.112	0.023	0.183	0.041	0.241	0.058	0.186	0.036	0.242	0.045
	h1		1.058	1.682	0.231	0.924	0.306	0.11	0.365	0.069	0.459	0.108	0.308	0.053	0.294	0.05
	yb558		0.737	1	0.186	0.622	0.182	0.202	0.159	0.036	0.124	0.041	0.104	0.026	0.13	0.027
	zs-1		0.305	1.11	0.117	0.146	0.153	0.064	0.145	0.026	0.105	0.025	0.062	0.012	0.054	0.01
	Fa-1#-1	Iron rich silicalite	221.26	409.59	55.41	232.04	58.75	21.83	51.26	6.79	33.26	6.04	19.67	2.64	17.89	2.59	Ding, Z.J., Liu, C.Q., 2000. REE geochemical evidence of the iron rich silicalite developed in the Bikou Group. Progress in natural science 10, 45-52..
	Fa-l#-3		1738.2	3013	439.5	1824.4	494.6	119.6	556.6	70.7	389	85.1	226.8	28.9	185.3	28.5
	Fa-1#4		711.2	1098	128.2	610.8	151.8	66	180.8	25.6	158.1	35.5	85.3	14.6	86.6	13.9
	Fal#-Tcl2		568.9	473.2	94.2	351.6	129.7	60.5	126.5	19.7	123.5	28.4	89.9	19.1	106.9	20.3
	Fa-11#		224	445	46.3	229.5	70.1	31.5	85.5	13.4	97.6	17.9	38.7	5.5	30.8	4.5
	Fapdl-1		762.4	1321.1	175.1	702.9	231.9	72.6	277.5	46.3	289.8	65.8	185.5	31.5	169.3	30
	Fapd1-10		93.22	172.37	26	110.38	45.63	33.58	38.8	5.11	26.29	5.05	13.49	1.61	11.31	2.1
	Fapdl-11		1449.7	2639.3	33.92	1611.8	390.7	96.9	439.4	65.4	297.2	72.2	228.2	31.4	249.6	40.5
	Fapdl-3		103	185.4	27.2	122.1	55	36.3	41.8	6.5	25.4	3.8	11.9	2.1	10.7	1.9
	Fapdl-4		79.67	153.02	21.64	98.74	31.82	26.37	30.17	4.27	21.54	3.86	12.13	1.64	11.87	2.26
	Fapdl-5		80.81	186.37	37.63	238.06	116.98	227.3	119.22	16.13	79.13	15.79	37.07	5.04	29.12	4.48
	Fapdl-6		142.92	281.05	46.5	236.25	89.54	56.22	113.77	17.29	103.29	20.19	54.01	7.26	40.51	6.5
	Fapd1-7		173.86	390.23	68.56	302.57	86.26	62.9	56.06	6.07	26.57	4.91	12.67	2.04	11.04	2.16
	Fapdl-8		361	689.4	85.4	347.1	133	68.5	96.3	14.3	84.5	19.1	58.5	8.5	55.7	7.9
	Fapdl-9		369.5	1084.4	109.2	534.8	143.8	113.7	111.1	10.7	58.1	9.8	27.2	4.8	26.6	2.9
	Fapdl-y		566	965	120.3	520.4	170.6	59.3	197.5	30.5	206.3	53	195.8	29.7	192.3	30.8
	Fapd2-5		126.8	224.3	40	203.8	73.2	97.7	72.9	11.6	67.2	16.1	46.3	6.6	43.3	6.2
	Fapd2-6		118.6	281.3	39.6	210.8	74.1	154.4	79.8	13	70.9	10.4	19.8	3.4	20.5	4.1
	Fapd2-7		179.07	262.77	39.66	175.71	50.71	30.35	52	7.01	35.9	7.01	16.27	2.02	13.07	2.53
	Fapd3-13		165.6	290.3	53	240.4	92.9	36	118.9	17.9	104.9	22.4	65.5	9.6	54.5	9.7
	Fapd3-14		145.6	263.5	37.8	169.7	73.6	48.8	125	22.8	164.4	45.1	154.7	24.6	143.8	24.4
	Fapd3-15		647.7	1356.7	157.6	773.2	212.1	60.7	243.7	37	224.2	52.5	161.7	39.3	213.8	33.3
	Fapd3-16		582	1359.9	177.1	974.4	246.3	68.3	216	33.2	152.6	37.3	118.5	17.3	139.5	25.2
	Fapd3-17		754.8	1689.2	242.4	1209.3	362.5	85.4	316.7	37.3	177.3	29.1	75.2	12.2	73.7	12.9
	Fapd3-20		172.7	292	43.9	196.3	78.6	58.8	127.4	20.4	152.5	42.5	145.2	23.9	166.9	25.7
	Fapd3-22		152.9	399.5	51.2	312.5	173.8	58.8	249.9	45.2	358.9	78.3	205.1	33.6	174.2	25.8
	Fapd3-23		142.6	269.9	44.5	207	64.2	32.2	62.8	8.6	50.7	10.8	29.2	3.5	22.6	3
Niutitang Formation	13HJP-0020	shale	102.8	78.1	24.36	106.4	23.5	5.55	29.96	4.36	27.02	6.02	16.52	2.09	11.57	1.61	Zhao, X.K., 2015. Geochemical characteristics and paleo marine environment of the lower Cambrian Niutitang Formation in Hunan Guizhou area. China University of Geosciences (Beijing).
	13HJP-0020B		110.86	67.76	26.12	113.04	25.14	6.93	33.08	5.01	32.36	7.51	21.68	2.91	17.01	2.46
	13HJP-0040		41.36	68.68	10.49	41.84	8.53	1.81	9.01	1.35	8.41	1.84	5.25	0.73	4.44	0.66
	13HJP-0040B		73.5	100.06	21.44	98.02	24.16	6.15	30.16	4.49	27.42	5.91	15.88	1.97	10.77	1.44
	13HJP-0090		42.64	75.08	10.07	39.42	8.11	2.02	8.48	1.3	8.15	1.83	5.37	0.76	4.67	0.7
	13HJP-0160		19.9	35.62	4.29	15.94	3.04	0.85	3.02	0.46	2.88	0.64	1.93	0.29	1.85	0.28
	13HJP-0200		17.99	32.48	3.94	14.76	2.78	0.76	2.54	0.37	2.18	0.47	1.39	0.21	1.37	0.21
	13HJP-0220		16.93	28.77	3.45	11.84	1.71	0.48	1.59	0.25	1.67	0.38	1.17	0.18	1.18	0.18
	13HJP-0290		13.05	26.62	2.99	11.45	2.3	0.6	2.38	0.36	2.26	0.5	1.49	0.22	1.38	0.21
	13HJP-0330		14.12	27.65	3.15	11.83	2.37	0.64	2.35	0.35	2.17	0.47	1.4	0.2	1.31	0.2
	13HJP-0370		13.47	25.93	3	11.37	2.28	0.62	2.3	0.35	2.2	0.49	1.46	0.22	1.4	0.22
	13HJP-0420		16.54	30.96	3.72	14.52	3	0.8	3.27	0.49	3.13	0.71	2.05	0.29	1.76	0.26
	13HJP-0470		15.62	31.78	3.62	13.83	2.81	0.73	2.75	0.41	2.52	0.54	1.59	0.23	1.48	0.22
	13HJP-0520		14.42	27.78	3.03	11.1	2.07	0.56	2.07	0.32	2.02	0.46	1.38	0.2	1.31	0.2
	13HJP-0560		12.85	21.97	2.47	8.23	1.17	0.39	1.29	0.23	1.59	0.39	1.23	0.19	1.19	0.18
	13HJP-0600		15.98	29.35	3.6	13.94	2.86	0.78	3.05	0.46	2.9	0.66	1.96	0.28	1.76	0.27
	13HJP-0690		12.98	23.83	2.71	9.56	1.61	0.47	1.6	0.25	1.63	0.37	1.15	0.18	1.17	0.18
	13HJP-0740		14.43	27.22	3.19	11.89	2.31	0.62	2.31	0.35	2.15	0.47	1.42	0.21	1.37	0.21
	13HJP-0780		14.86	27.82	3.32	12.45	2.48	0.68	2.56	0.39	2.45	0.55	1.65	0.24	1.58	0.25
	13HJP-0800		13.51	25.31	3.05	11.37	2.32	0.66	2.32	0.36	2.18	0.48	1.42	0.21	1.38	0.21
	13HJP-0830		14.7	27.72	3.42	13.27	2.78	0.72	2.87	0.42	2.66	0.59	1.74	0.25	1.61	0.25
	13HJP-0880		13.75	26.25	3.18	12.22	2.51	0.68	2.53	0.38	2.35	0.52	1.54	0.22	1.45	0.22
	13HJP-0900		12.97	24.29	2.95	11	2.21	0.6	2.18	0.33	2.1	0.46	1.38	0.2	1.35	0.21
	13HJP-0940		12.13	22.21	2.59	9.11	1.48	0.45	1.45	0.24	1.53	0.35	1.08	0.16	1.09	0.17
	13HJP-0990		9.3	17.34	2.15	8.47	1.89	0.52	1.87	0.28	1.77	0.4	1.2	0.18	1.16	0.18
	13HJP-1020		11.43	20.66	2.48	9.04	1.68	0.5	1.68	0.26	1.63	0.36	1.11	0.17	1.12	0.17
	13HJP-1070		5.62	15.16	1.52	5.85	1.22	0.37	1.33	0.22	1.45	0.33	1.03	0.16	1.06	0.17
	13HJP-1120		9.93	18.47	2.22	8.3	1.59	0.45	1.55	0.24	1.44	0.32	0.94	0.14	0.91	0.14
	13HJP-1180		10.27	18.56	2.22	7.95	1.48	0.44	1.47	0.23	1.44	0.32	0.95	0.14	0.95	0.14
	13HJP-1200		10.62	20.09	2.46	9.17	1.82	0.49	1.74	0.26	1.58	0.34	1.01	0.15	0.99	0.15
	13HJP-1240		12.46	22.81	2.77	10.18	1.95	0.53	1.91	0.29	1.79	0.4	1.2	0.18	1.18	0.18
	13HJP-1280		12.88	23.98	2.89	10.82	2.1	0.57	2.02	0.3	1.84	0.4	1.18	0.18	1.13	0.17
	13HJP-1320		14.25	26.76	3.24	11.96	2.3	0.6	2.18	0.33	2.02	0.43	1.28	0.19	1.25	0.19
	13HJP-1420		12.13	23.44	2.86	11.05	2.35	0.63	2.43	0.36	2.17	0.47	1.37	0.2	1.26	0.19
	13HJP-1470		14.46	26.88	3.11	11.25	2.01	0.61	1.97	0.3	1.86	0.41	1.25	0.19	1.24	0.19
	13HJP-1530		17.9	33.95	3.7	12.07	1.49	0.5	1.4	0.24	1.64	0.37	1.15	0.18	1.19	0.18
	13HJP-1570		15.3	28.5	3.23	11.06	1.67	0.51	1.58	0.26	1.71	0.38	1.19	0.18	1.2	0.18
	13HJP-1600		29.6	54.68	6.05	19.96	2.48	0.82	2.35	0.4	2.74	0.63	1.97	0.3	2.04	0.31
	13HJP-1650		31.52	59.26	6.7	22.62	2.98	0.94	2.67	0.45	3	0.68	2.11	0.32	2.13	0.32
	13NTT-M		29.86	54.94	5.78	18.95	2.59	1	2.5	0.41	2.8	0.66	2.06	0.31	2.07	0.32
	13NTT-N		40.94	66.58	8.39	29.2	4.84	1.29	4.09	0.59	3.79	0.87	2.69	0.41	2.74	0.42
	13NTT-O		38	59.84	7.14	23.34	3.5	1.02	3.7	0.64	4.46	1.06	3.34	0.5	3.25	0.49
	13NTT-P		36.06	67.4	7.05	23.02	3.16	1.12	3.26	0.53	3.6	0.86	2.69	0.4	2.66	0.42
	13NTT-Q		23.62	42.61	4.48	14.81	2.08	0.82	2.33	0.37	2.61	0.64	1.98	0.3	1.96	0.3
	13NTT-R		16.42	27.22	3.05	10.62	1.72	0.66	1.66	0.25	1.72	0.42	1.32	0.2	1.34	0.21
	13NTT-S		26.2	49.18	5.07	16.64	2.3	0.75	2.23	0.35	2.43	0.58	1.82	0.28	1.82	0.28
	13NTT-T		33.42	62.52	7.17	24.38	3.24	1.18	2.97	0.49	3.36	0.8	2.55	0.4	2.65	0.42
	13NTT-U		30.96	55.26	6.59	23.2	3.63	1.07	3.43	0.54	3.51	0.79	2.44	0.37	2.42	0.37
	13NTT-V		31.92	60.06	6.03	18.44	2.05	0.63	1.89	0.32	2.13	0.48	1.49	0.23	1.51	0.23
	13NTT-V2		28.82	50.82	5.68	18.82	2.51	0.96	2.56	0.43	3.04	0.72	2.38	0.37	2.5	0.39
	13NTT-W2		33.06	62.42	7.65	28.24	5.47	1.34	5.11	0.8	5.03	1.13	3.47	0.52	3.47	0.54
	13NTT-X		21.41	40.74	4.72	18.45	4.42	1.27	3.32	0.48	2.62	0.51	1.47	0.23	1.55	0.24
	13NTT-Y		13.69	25.33	2.65	8.47	1.18	0.37	1.09	0.17	1.11	0.25	0.76	0.12	0.77	0.12
	13NTT-Z		30.5	54.9	5.35	15.45	1.72	0.63	1.78	0.31	2.15	0.51	1.63	0.26	1.73	0.27
Longmaxi Formation	S1-1	mudstone	41.5	70.5	9.25	34.8	6.63	1.22	5.72	0.864	4.46	0.862	2.42	0.369	2.37	0.372	Zhang, Q.M., Jiang, Z.X., Guo, Y.H., Zhang, W.S., 2013. Geochemical characterisitcs and paleoenvironment reconstruction of the Longmaxi Formation in southeast Sichuan and Northern Guizhou. Geological Science and Technology Information 32, 124-130.
	S1-2		46.3	79.4	9.95	36.4	6.84	1.15	5.92	0.916	4.69	0.881	2.51	0.378	2.32	0.361
	S11-3		48.2	84.4	10.2	36.4	6.1	1.07	5.29	0.778	3.92	0.766	2.17	0.338	2.09	0.333
	S1-4		53.8	94.2	11.4	40	6.73	1.16	5.74	0.846	4.36	0.841	2.43	0.38	2.47	0.368
	S1-5		45.7	78	9.48	32.9	5.37	1.04	4.76	0.708	3.72	0.718	2.07	0.319	2.01	0.317
	S1-6		15.4	41.8	3.85	15.1	2.99	0.53	2.62	0.461	2.64	0.515	1.46	0.215	1.28	0.197
	MCP1	shale	39.1	80.3	8.41	28.1	4.42	2.96	4.01	0.62	3.42	0.76	2.48	0.38	2.53	0.42	He, L., Song, C.Y., Liu, J.Q., 2018. Shale geochemical characteristics and enrichment mechanism of organic matter of Wufeng-Longmaxi Formation in the Mabian area of southeast Sichuan basin. Journal of Northeast Petroleum University 42, 52-65.
	MCP2		19.1	38	4.79	18.2	3.51	1.11	3.08	0.62	3.35	0.69	1.93	0.26	1.62	0.27
	MCP3		14.8	26.2	3.97	15.2	2.69	1.26	2.13	0.4	2.17	0.43	1.27	0.17	1.14	0.19
	MCP4		16.4	27.7	3.98	15	2.73	1.69	2.21	0.42	2.18	0.44	1.26	0.17	1.08	0.18
	MCP5		19.8	34.4	4.89	18.2	3.35	2.4	2.56	0.48	2.56	0.5	1.4	0.18	1.18	0.2
	MCP6		41.8	75	9.92	36.6	6.84	6.81	5.47	0.98	4.94	0.96	2.69	0.36	2.26	0.38
	MCP7		62.3	116	14.5	51.2	8.72	5.11	6.77	1.09	5.05	0.94	2.7	0.38	2.5	0.42
	MCP8		65.4	122	15.2	54.6	9.64	4.87	7.59	1.28	5.87	1.09	3.01	0.42	2.66	0.46
	MCP9		41.5	78	9.92	35.6	6.33	3.62	4.73	0.88	4.43	0.84	2.33	0.32	2.04	0.35
	MCP10		41.9	79.9	10	36.8	6.82	3.4	5.52	1.06	5.41	1.03	2.8	0.37	2.29	0.39
	MCP11		46.7	89.7	11.6	42.6	7.66	3.47	5.92	1.08	5.41	1.02	2.8	0.37	2.27	0.39
	MCP12		52.4	98.1	12.6	45.8	8.21	3.18	6.47	1.21	6.08	1.14	3.12	0.41	2.52	0.42
	MCP13		52.3	98.8	12.8	46.5	8.2	2.75	6.32	1.16	5.76	1.08	2.95	0.39	2.36	0.39
	MCP14		55.6	102	13.3	47.8	8.36	3.12	6.34	1.13	5.46	1.01	2.79	0.38	2.42	0.41
	MCP15		62	112	14.2	48.6	7.18	2.22	5.32	0.92	4.64	0.94	2.81	0.4	2.58	0.45
	MCP16		57.5	108	13.7	47.8	7.84	2.5	6.02	1.08	5.54	1.09	3.17	0.44	2.83	0.48
	MCP17		53.6	101	12.8	45.6	7.66	2.43	5.82	1.04	5.18	1.02	2.94	0.41	2.66	0.46
	MCP18		57.7	108	13.6	48.1	8.18	2.12	6.28	1.16	5.88	1.15	3.23	0.45	2.76	0.48
	MCP19		70.6	108	14.9	52.7	8.62	2.03	6.35	1.24	6.49	1.28	3.59	0.48	3.05	0.52
	MCP20		54.2	96.4	12.4	43.7	7.24	1.85	5.56	1.05	5.43	1.07	3.07	0.42	2.63	0.45
	Y1	shale	3.67	7.63	1.24	5.33	1.21	0.58	1.23	0.2	1.21	0.24	0.73	0.1	0.66	0.098
	Y2		5.69	10.42	1.42	5.66	1.15	0.57	1.28	0.21	1.17	0.25	0.76	0.1	0.72	0.11	Zhang, Q., Wang, J., Yu, Q., Xiao, Y.F., Zhang, B., Wang, X.F., Zhao, A.K., 2018. The Silicon Source and Sedimentary Environment of the Lower Silurian Longmaxi Formation in Yanyuan Basin, Western Edge of the Yangtze Platform. Geological Review 64, 610-622.
	Y3		6.44	11.4	1.55	6.02	1.17	0.55	1.38	0.23	1.35	0.28	0.81	0.11	0.72	0.1
	Y4		10.3	16.9	2.22	8.31	1.62	0.61	1.78	0.28	1.58	0.31	0.9	0.13	0.8	0.12
	Y5		14.4	25.3	3.4	13.1	2.53	0.81	2.81	0.44	2.45	0.48	1.41	0.19	1.2	0.17
	Y6		13.3	23.1	3.12	11.8	2.26	0.72	2.33	0.34	1.82	0.35	1.06	0.14	0.93	0.14
	Y7		14.5	26.3	3.61	13.3	2.4	0.62	2.41	0.36	1.95	0.39	1.19	0.17	1.16	0.17
	Y8		19.9	34.4	4.43	15.1	2.03	0.62	2.13	0.27	1.42	0.3	1.01	0.15	1.05	0.15
	Y9		17	35.6	5.25	20.3	3.99	0.96	3.77	0.62	3.52	0.7	2.15	0.31	2.12	0.3
	Y10		24	42.1	5.74	21.3	3.85	0.99	3.95	0.58	3.14	0.61	1.77	0.24	1.58	0.23
	Y11		18.2	30.9	4.05	13.3	1.72	0.52	1.89	0.24	1.34	0.28	0.94	0.14	0.96	0.15
	Y12		14.4	25.6	3.53	13.7	2.69	0.75	2.72	0.43	2.41	0.48	1.39	0.19	1.29	0.19
	Y13		20.3	39.9	5.76	21.8	4.03	0.89	4.12	0.62	3.39	0.68	2.05	0.29	1.9	0.27
	Y14		13.2	24	3.24	12	2.23	0.73	2.22	0.33	1.81	0.35	1.04	0.14	0.93	0.14
	Y15		12.4	29.6	4.71	19.4	3.91	0.91	3.8	0.61	3.43	0.68	1.95	0.28	1.88	0.27
	Y16		21.5	34.5	4.1	13.3	1.84	0.5	2.07	0.27	1.61	0.35	1.16	0.16	1.14	0.17
	Y17		13.4	22.6	2.74	9.08	1.24	0.53	1.47	0.18	0.99	0.21	0.71	0.11	0.75	0.11
	Y18		31.4	54.1	6.62	21.7	2.88	0.71	3.56	0.46	2.7	0.58	1.95	0.28	1.92	0.29
	Y19		13.2	23.4	3.19	12.2	2.43	0.75	2.49	0.36	1.97	0.38	1.15	0.16	1.07	0.16
	Y20		10.5	20.1	2.54	8.96	1.45	0.5	1.45	0.17	0.86	0.16	0.52	0.07	0.5	0.067
Houhe Group	07QL13	gneisses	44.6	80.9	8.52	28.2	4.53	1.17	3.44	0.46	2.48	0.46	1.18	0.17	1	0.14	Wu, Y., Gao, S., Zhang, H., Zheng, J., Liu, X., Wang, H., Gong, H., Zhou, L., Yuan, H., 2012. Geochemistry and zircon U–Pb geochronology of Paleoproterozoic arc related granitoid in the Northwestern Yangtze Block and its geological implications. Precambrian Research 200-203, 26-37.
	07QL14		101	192	21.4	73.8	11.7	1.87	7.78	0.96	4.76	0.84	2.15	0.29	1.54	0.22
	07QL15		56.9	102	11.7	42.1	7.38	1.67	5.57	0.72	3.82	0.74	2.05	0.29	1.73	0.26
	07QL17		28.4	48.6	5.39	19.1	3.59	1.14	2.67	0.38	2.23	0.43	1.23	0.17	1.16	0.17
	07QL19		45.8	81.1	8.43	28.1	4.35	1.14	2.97	0.38	2.16	0.4	1.07	0.15	0.95	0.13
	07QL20		35.8	78.2	9.47	34.8	6.39	1.23	4.94	0.69	3.85	0.75	1.99	0.29	1.64	0.26
	07QL21		81.9	153	16.9	59	10.9	1.68	8.7	1.21	6.47	1.17	3.08	0.42	2.25	0.33
	11BJ-12	granodiorite	10.16	18.19	2.16	8.16	1.44	0.76	1.24	0.15	0.86	0.17	0.52	0.08	0.54	0.08	Duan, B.L., Su, L., Wang, J., Xiao, L., 2018. Origin of Neoproterozoic complexes in the northwestern margin of the Yangtze plate Sangxigou granite: Breakup of the Rodinia supercontinent and melting of the crust. Geochimica 47, 506-521.
	11BJ-26		14.95	28.12	3.08	10.98	1.72	0.65	1.35	0.18	1.03	0.23	0.72	0.11	0.75	0.12
	11BJ-27		14.27	27.04	2.93	10.93	1.77	0.73	1.39	0.16	0.91	0.18	0.55	0.09	0.62	0.1
	11BJ-28		7.92	14.88	1.65	6.39	1.18	0.45	1.06	0.14	0.79	0.15	0.42	0.06	0.39	0.06
	11BJ-29		26.94	47.77	4.83	17.22	2.68	0.85	2.27	0.28	1.57	0.29	0.83	0.11	0.73	0.11
	14BJ-19-17	Garnet mica granite	11.5	27.12	3.61	13.69	4.55	0.21	5.55	1.18	8.44	1.88	6.05	1.02	7.5	1.12
	14BJ-19-29		4.74	11.33	1.48	5.63	1.97	0.22	2.06	0.37	2.24	0.44	1.33	0.21	1.49	0.22
	14BJ-25		27.28	49.4	5.27	17.59	3.36	0.67	3.12	0.49	3.07	0.65	2.05	0.32	2.23	0.35
	14BJ-29		31.27	63.14	7.42	26.67	5.48	0.75	4.84	0.68	3.8	0.76	2.18	0.31	1.99	0.31
	14BJ-56		3.96	9.95	1.18	4.35	1.5	0.19	1.81	0.37	2.18	0.4	1.1	0.16	1.06	0.15
	14BJ-57		5.05	12.34	1.48	5.61	2	0.34	2.38	0.45	2.59	0.5	1.44	0.21	1.41	0.21
	14BJ-58		24.23	46.76	4.6	15.13	2.92	0.71	2.75	0.45	2.82	0.63	1.87	0.28	1.81	0.28
	11BJ-25		26.08	67.9	6.22	23.2	4.69	0.77	4.5	0.69	4.41	0.87	2.59	0.37	2.55	0.36
	11BJ-10		34.54	68.24	10.62	44.26	9.99	0.46	8.87	1.25	7.4	1.38	3.9	0.52	3.27	0.44
	14BJ-01		31.6	57.94	6.12	20.08	3.43	0.71	2.98	0.46	3.08	0.71	2.38	0.4	2.87	0.46
	5311	clastic rocks	13.6	26.7	4.21	18.2	4.18	1.31	3.32	0.54	2.96	0.63	1.72	0.3	1.76	0.26	Zhou, L., Gao, S., Liu, Y.S., Ling, W.L., Zhang, L., 2007. Geochemistry and Implications of Clastic Sedimentary Rocks from the Northern Margin of Yangtze Craton. Earth Science - Jour nal of China U niver sity of Geosciences 32, 29-38.
	5307		11.8	25.1	3.47	14.2	3.3	0.82	2.75	0.49	2.96	0.68	1.88	0.35	2.05	0.32
	4417		17.8	36.7	5.4	22.4	4.96	1.27	3.99	0.68	3.82	0.81	2.27	0.41	2.47	0.36
	4424		22.1	41	6.47	26.6	5.65	1.62	4.47	0.76	4.06	0.85	2.37	0.4	2.33	0.36
	4002		15.5	26.5	4.1	16.5	3.81	1.15	3.53	0.61	3.59	0.78	2.13	0.36	2.11	0.34
	4016		16.4	41	6.44	29.5	7.95	2.07	7.08	1.26	7.12	1.52	4.19	0.72	4.18	0.66
	4326		23.6	54	7.15	29.2	5.39	1.33	4.5	0.74	4.13	0.89	2.54	0.44	2.63	0.41
	4513		37.3	64.8	9.02	32.3	5.35	1.16	4.56	0.69	3.73	0.79	2.35	0.42	2.46	0.39
	4335		33	60.9	8.44	32.4	6.5	1.46	5.43	0.86	4.59	0.94	2.64	0.46	2.61	0.41
	4348		36.9	70.5	9.9	38.9	7.9	1.68	6.29	1	5.27	1.08	3.01	0.52	3.03	0.47
	4358		20.2	41.9	6.5	26.5	6.01	1.33	4.77	0.81	4.36	0.89	2.56	0.44	2.61	0.41
	4607		29.1	57.2	7.65	29.5	6.2	1.31	4.89	0.8	4.19	0.87	2.48	0.44	2.69	0.43
	4618		26.5	51.8	6.89	26.2	5.33	1.1	4.36	0.64	3.41	0.66	1.86	0.32	1.91	0.29
	4814		30.7	58.9	8.23	32	6.4	1.3	5.08	0.77	4.07	0.8	2.26	0.39	2.35	0.36
	4820		39.17	40.96	9.48	36.29	7.27	1.62	6.21	1.18	7.8	1.78	5.64	0.9	6.04	0.9
	4915		34.04	59.35	8.06	29.05	5.66	1.53	4.81	0.83	4.43	0.97	2.65	0.48	3.07	0.5
	4919		36.75	34.03	8.95	33.07	6.71	1.51	5.35	1.13	7.23	1.72	4.91	0.92	5.61	0.92
	4939		38.3	73.6	10.5	41.7	8.23	1.81	6.43	0.91	4.6	0.92	2.53	0.43	2.53	0.38
	4203	complex	21.35	40.81	5.51	20.57	3.67	0.82	2.81	0.44	2.39	0.47	1.3	0.19	1.21	0.18	Ling, W.L., Gao, S., Zhang, B.R., Zhou, L., Zhang, H.F., 1997. Early precambrian continental crust evolution at the northern margin of Yangtze Craton: Constrain from the elemental and isotopic geochemical study of Houhe Complex. Mineral Petrol 17, 27-33.
	4206		35.18	68.47	8.78	29.63	5.09	1.18	3.42	0.5	2.41	0.48	1.29	0.19	1.23	0.18
	4210		33.24	62.19	7.73	24.99	4.46	0.87	3.41	0.56	2.82	0.56	1.63	0.26	1.56	0.22
Xixiang Group	B02	basalt	9.4	27.6	4.62	21.9	6.51	218	8.05	1.3	858	1.76	5.65	0.76	4.87	0.67	Xia, L.Q., Xia, Z.C., Ma, Z.P., Xu, X.Y., Li, X.M., 2009. Petrogenesis of Volcanic Rocks from Xixiang Group in Middle Part of South Qinling Mountains. Northwestern Geology 42, 1-37.
	B04		7.5	21.2	3.93	18.8	5.6	2.04	7.33	1.09	7.34	1.5	4.64	0.68	4.09	0.6
	B08		10.8	26.5	4.01	18	5.07	1.77	6.15	0.99	6.44	1.3	4.06	0.58	3.49	0.51
	B09		16.6	36.7	5.75	25.1	6.7	2.08	8.22	1.37	8.89	1.81	5.88	0.83	5.04	0.7
	B12		16.5	39.2	5.84	228	5.3	1.83	5.72	0.9	5.61	1.08	3.46	0.46	2.85	0.38
	B13		18.7	45.7	6.51	25.2	6.02	2.01	6.58	1.03	6.23	1.2	3.75	0.51	3.38	0.46
	5516		12.1	27.2	4.04	17.7	4.94	1.5	5.59	0.929	6.06	1.18	3.34	0.507	3.34	0.486
	5519		6.73	15.8	2.15	9.42	2.3	0.705	2.47	0.381	2.27	0.444	1.3	0.201	1.31	0.205
	BMX1		16.6	31.6	4.03	16.1	3.36	1.08	3.23	0.455	2.36	0.469	1.39	0.197	1.29	0.195
	BMX2		6.93	14.5	2.03	8.81	2.33	0.767	2.29	0.36	2.27	0.47	1.37	0.208	1.44	0.217
	B07		6.1	13.2	2	8	1.91	0.75	2.22	0.37	2.24	0.44	1.43	0.21	1.22	0.17
	B10	Basaltic andesite	26.6	59.8	8.03	33.4	8.71	2.46	10.46	1.72	11.36	2.29	7.34	1.05	6.59	0.92
	B11		20.2	45.5	6.31	26.1	6.16	212	6.46	1.01	5.96	1.18	3.6	0.49	3.02	0.45
	5503		13.7	320	4.55	20.3	5.41	1.59	6.91	1.2	8.03	1.64	5.1	0.763	5.23	0.784
	5509		10.8	26.7	4.04	18.5	5.07	1.81	6.15	0.979	6.07	1.16	3.3	0.482	3.06	0.45
	5520		8.91	19.4	2.7	11.1	3.12	1.01	2.83	0.408	2.39	0.464	1.37	0.207	1.38	0.208
	B03		12.1	25.7	3.02	11.3	2.69	0.81	2.84	0.41	2.71	0.56	1.75	0.26	1.6	0.23
	5414	basalt	4.54	12.7	1.99	10.1	3.33	1.38	4.32	0.79	4.87	1.03	2.97	0.45	2.88	0.431
	5408		1.76	4.62	0.768	4.16	1.5	0.457	212	0.423	2.88	0.611	1.81	0.276	1.82	0.278
	5413	andesite	4.07	10.8	1.72	9.11	2.95	1.1	4.21	0.801	5.43	1.12	3.11	0.485	2.99	0.463
	5410	Basaltic andesite	0.977	2.92	0.51	2.96	1.21	0.414	1.84	0.37	2.63	0.549	1.66	0.242	1.66	0.255
	5415	dacite	20.1	39.6	4.81	19	4.03	1.3	4.32	0.653	3.99	0.763	2.34	0.371	2.47	0.401
	5201	basalt	9.56	24.8	3.76	17.6	5.16	2.04	6.66	1.16	7.45	1.45	4.16	0.585	3.79	0.575
	5212		28.5	60.6	7.83	31.6	7.06	2.08	6.71	0.944	4.95	0.944	271	0.376	2.49	0.396
	SJ03		25.8	53.3	7.54	29.1	6.16	2.02	6	0.86	5.03	0.95	2.95	0.4	2.59	0.38
	SJ04		16.2	33.8	4.18	16.8	3.6	1.25	3.65	0.54	3.33	0.68	2.19	0.31	1.73	0.23
	SJ09		21.8	46.9	6.38	25.1	5.63	1.8	5.22	0.73	4.6	0.86	2.71	0.36	2.22	0.33
	SJ10		24.8	52.9	6.87	28.2	5.87	1.9	5.71	0.79	4.68	0.88	2.81	0.4	2.47	0.37
	SJ11		22.5	49.2	6.45	25.6	5.79	1.79	5.36	0.76	4.38	0.88	2.64	0.39	2.22	0.32
	SJ12		26.6	52.2	6.76	28.1	5.99	1.84	5.71	0.78	4.67	0.93	2.8	0.43	2.43	0.36
	SJ01	Basaltic andesite	20.5	44.8	5.93	22.1	5.1	1.56	4.78	0.69	4.18	0.8	2.48	0.36	2.25	0.31
	SJ02		16.8	38.7	5.21	20.3	4.48	1.51	4.48	0.67	3.99	0.78	2.47	0.34	2.14	0.32
	SJ07		19.7	40	5.74	22.3	4.86	1.57	4.53	0.64	3.85	0.71	2.27	0.31	1.92	0.28
	SGH-1	andesite	21.8	45.2	5.66	23.2	4.91	1.46	4.5	0.674	3.85	0.71	2.1	0.315	2	0.313
	SJ-15		21.4	44.6	6.03	24	5.24	1.58	4.82	0.68	3.92	0.79	2.5	0.35	2.41	0.3
	5204	dacite	36.9	76.5	9.85	37.2	8.18	211	8.13	1.15	6.48	1.28	3.77	0.564	3.74	0.558
	5215		29.7	62.5	8.29	32.8	7.02	1.92	6.77	0.982	5.46	1.09	3.08	0.459	3.06	0.487
	5216		31.1	77.9	8.53	33.4	7.3	1.77	7.41	1.13	6.69	1.28	4.02	0.589	3.89	0.622
	5211	rhyolite	37.9	90.1	11	42.6	10.3	1.64	11.5	2.22	15	2.99	9.41	1.52	10.3	1.63
	5208		53.1	11.3	14.1	566	127	2.25	15.4	2.69	17.6	3.53	10.6	1.6	10.2	1.53
	5220		37	78.4	10.8	41.8	10.2	1.13	11.2	1.83	11.8	2.31	7.15	1.12	7.35	1.07
	SGH-2		52.5	11	14.9	57.2	14.2	2.28	15.3	2.57	16.6	3.45	10.3	1.53	10.4	1.59
	TO5	basalt	15.5	36.3	5.74	23.9	6.52	2.32	7.66	1.24	8.02	1.55	5.24	0.72	4.35	0.58
	TO6		16.1	37.5	5.65	25	6.54	2.34	8.18	1.26	8.23	1.66	5.2	0.74	4.54	0.64
	T03	Basaltic andesite	20.9	37.7	5.02	18.5	3.89	1.24	3.96	0.58	3.49	0.66	2.05	0.29	1.72	0.25
	T13		19.1	40.8	5.39	19.2	4.13	1.17	4.73	0.73	4.38	0.94	2.94	0.41	2.55	0.35
	5008		18.9	40.7	5.41	21.8	5.04	1.52	5.54	0.875	5.24	1.01	2.91	0.434	2.82	0.423
	5109	andesite	14.8	3.28	4.31	17.3	4.13	1.24	4.34	0.671	3.92	0.736	2.22	0.308	2.05	0.328
	5112		20.8	42.1	5.53	22.2	5.57	1.63	5.93	0.957	5.86	1.09	3.22	0.485	3.15	0.458
	T11		16.3	34.8	4.5	16.8	3.7	1.11	4.12	0.6	3.73	0.75	2.36	0.33	2.05	0.29
	T14		16	34.2	4.52	15.9	3.84	1.17	3.97	0.61	3.78	0.76	2.45	0.34	2.15	0.29
	5002	dacite	34.8	61.2	7.79	27	5.52	1.13	5.78	0.856	5.08	1.03	3.09	0.467	3.34	0.497
	5006		29.9	55.8	6.51	23.6	4.4	1.14	4.85	0.755	4.38	0.872	2.56	0.407	2.78	0.441
	1	basalt	13.23	30.09	4.18	17.48	4.34	1.53	4.71	0.76	4.86	0.96	3.13	0.44	2.8	0.41	Lai, S.C., Zhang, G.W., Yang, R.Y., 2000. The determination of Lianghe Raofeng WULIBA island arc magmatic belt and its tectonic significance. Science China (series D) 30, 53-63.
	2	dacite	26.6	65.6	9.83	43.9	11.63	2.01	12.69	2.13	14.65	2.94	9.99	1.38	8.33	1.12
	3	rhyolite	23.05	46.25	5.48	17.55	3.46	1.35	3.38	0.49	2.95	0.62	1.98	0.29	1.91	0.28
	4	basalt	16.7	40.13	5.55	21.3	5.65	2	6.54	1.06	6.36	1.27	3.83	0.54	3.08	0.44
	5	Dacite rhyolite	31	65.62	7.4	26.9	5.42	1.23	5.08	0.8	4.82	0.95	3.13	0.45	2.84	0.41
	6	andesite	37.84	79.36	10.08	37.5	8.35	2.21	8.48	1.3	7.92	1.49	4.58	0.61	3.56	0.44
	7	andesite	19.6	42.03	5.73	22.18	4.92	1.56	4.65	0.67	3.99	0.77	2.43	0.34	2.18	0.3
	8	rhyolite	22.95	48.05	6.36	25.48	5.51	1.77	5.28	0.74	4.45	0.86	2.68	0.38	2.28	0.33
	07T-20	rhyolite	26.7	52.8	4.21	21	3.88	0.48	2.89	0.33	2.49	0.49	1.81	0.36	1.71	0.28	Xu, X.Y., Chen, J.L., Li, X.M., Ma, Z.P., Wang, H.L., Xia, L.Q. Xia, Z.C., Li, P., 2010. Geochemistry and petrogenesis of volcanic rocks from Sanlagpu Formation and Dashigou Formation. Acta Petrologica Sinica 26, 617-632.
	07T-18	basalt	15.2	29.1	5.09	20.6	5.32	1.62	7.98	1.03	8.12	1.63	5.24	0.6	3.71	0.52
	93-21	Trachyte	30.1	69.5	5.95	26.2	5.12	1.12	5.54	0.68	4.98	1.01	2.99	0.34	2.16	0.51
	SJ01	andesite	20.5	44.8	5.93	2210	5.1	1.56	4.78	0.69	4.18	0.8	2.48	0.36	2.25	0.31	Lai, S.C., Yang, R.Y., Zhang, G.W., 2001. Tectonic setting and implication of the Sunjiahe volcanic rocks, Xixiang Group, in South Qinlng. Chinese Journal of Geology 36, 295-303.
	SJ02		16.8	38.7	5.21	20.3	4.48	1.51	4.48	0.67	3.99	0.78	247	0.34	214	0.32
	SJ04		16.2	33.8	4.18	1680	3.6	1.25	3.65	0.54	3.33	0.68	2.19	0.31	1.73	0.23
	SJ09		21.8	46.9	6.38	25.1	5.63	1.8	5.22	0.73	4.6	0.86	271	0.36	222	0.33
Dengying Formation	D28	chert	8.2	11.63	1.9	7.89	1.96	0.5	2.37	0.34	1.96	0.38	1.04	0.15	1.03	0.16	Chen, B.Y., Li, R.X., She, J.J., Liu, S.J., 2018. Geochemical Characteristics of the Sinian Dengying Formation in Northern Margin of the Yangtze Platform and Their Implications to Hydrothermal Sedimentation. Bulletin of Mineralogy, Petrology and Geochemistry 37, 770-778.
	D36		8.25	9.59	1.65	7.32	1.38	0.4	1.86	0.26	1.77	0.41	1.25	0.17	1.02	0.14
	D115		0.62	1.12	0.13	0.54	0.1	0.02	0.11	0.01	0.08	0.02	0.05	0.01	0.05	0.01
	D56	Siliceous dolomite	0.38	0.69	0.07	0.29	0.06	0.02	0.05	0.01	0.04	0.01	0.02	0	0.02	0
	D58		5.72	13.2	1.61	6.97	1.51	0.36	1.7	0.24	1.38	0.26	0.72	0.1	0.58	0.09
	D18	dolomite	3.98	7.32	0.95	3.97	0.78	0.2	0.93	0.12	0.7	0.15	0.39	0.06	0.36	0.05
	D19		3.11	4.94	0.62	2.46	0.45	0.13	0.58	0.07	0.43	0.09	0.28	0.04	0.22	0.03
	D22		3.21	5.46	0.74	3.02	0.56	0.18	0.77	0.09	0.53	0.11	0.31	0.05	0.27	0.04
	D51		2.25	3.91	0.47	1.86	0.39	0.33	0.56	0.06	0.31	0.06	0.18	0.03	0.15	0.02
	D78		0.93	1.89	0.22	0.85	0.18	0.04	0.24	0.03	0.17	0.03	0.09	0.01	0.08	0.01
	D79		0.24	0.49	0.06	0.23	0.05	0.02	0.05	0.01	0.04	0.01	0.02	0	0.02	0
	D90		0.2	0.37	0.05	0.23	0.05	0.01	0.05	0.01	0.04	0.01	0.02	0	0.02	0
	LHK-6	dolomite	2.5	4.3	0.5	2.1	0.4	0.1	0.4	0.08	0.4	0.09	0.3	0.05	0.3	0.05	Chen, Y.L., Chu, X.L., Zhang, X.L., Zhai, M.G., 2015. Carbon and sulfur isotopes and trace elements of dolostones from Dengying Formation in Zhenba area, southern Shaanxi Province: redox environment in the shallow sea at the end of Ediacaran. Science China 45, 963-981.
	LHK-7		49	106	13.6	57	10.4	3.2	10.6	2.1	10.7	2.1	5.6	0.8	4.5	0.6
	LHK-9		3.9	8.4	1	4.1	0.8	0.3	0.8	0.2	1	0.2	0.6	0.1	0.6	0.1
	LHK-11		3.6	7.3	0.9	3.5	0.6	0.2	0.6	0.1	0.6	0.1	0.4	0.06	0.3	0.05
	LHK-13		0.4	0.6	0.08	0.3	0.1	0.02	0.1	0.01	0.06	0.01	0.03	0.005	0.03	0.005
	LHK-16		4.6	8.7	1.1	4.4	0.8	0.2	0.8	0.2	0.8	0.2	0.5	0.07	0.5	0.07
	LHK-17		0.2	0.3	0.04	0.1	0.03	0.01	0.02	0.004	0.02	0.004	0.01	0.002	0.009	0.01
	LHK-20		1.9	3.1	0.4	1.5	0.3	0.08	0.3	0.05	0.3	0.05	0.2	0.03	0.2	0.02
	LHK-21		2.5	3.4	0.6	2.6	0.5	0.1	0.4	0.09	0.5	0.1	0.3	0.04	0.2	0.04
	LHK-23		1.1	1.3	0.2	1.1	0.2	0.05	0.2	0.04	0.2	0.04	0.1	0.02	0.1	0.02
	LHK-24		0.4	0.7	0.1	0.6	0.1	0.03	0.1	0.03	0.1	0.03	0.09	0.01	0.08	0.01
	LHK-26		0.1	0.2	0.03	0.1	0.03	0.01	0.03	0.007	0.04	0.009	0.03	0.004	0.03	0.004
	LHK-27		0.3	0.5	0.06	0.2	0.03	0.008	0.04	0.007	0.03	0.007	0.02	0.003	0.02	0.003
	LHK-29		0.2	0.3	0.04	0.2	0.03	0.006	0.03	0.006	0.03	0.007	0.02	0.003	0.02	0.003
	LHK-30		0.07	0.1	0.02	0.07	0.01	0.004	0.01	0.002	0.01	0.002	0.007	0.001	0.008	0.001
	LHK-31		0.2	0.4	0.06	0.2	0.04	0.009	0.04	0.008	0.04	0.009	0.03	0.004	0.02	0.004
	LHK-32		0.2	0.3	0.04	0.1	0.03	0.01	0.03	0.005	0.03	0.007	0.02	0.004	0.02	0.004
	LHK-33		0.2	0.4	0.05	0.2	0.04	0.4	0.06	0.006	0.03	0.006	0.02	0.003	0.02	0.004
	LHK-34		0.3	0.4	0.05	0.2	0.03	0.006	0.03	0.005	0.03	0.007	0.02	0.003	0.02	0.004
	LHK-37		0.1	0.2	0.04	0.1	0.02	0.005	0.02	0.004	0.02	0.006	0.02	0.003	0.02	0.003
	LHK-40		0.2	0.4	0.06	0.2	0.03	0.008	0.03	0.006	0.03	0.007	0.02	0.003	0.02	0.003
	LHK-41		2	2	0.3	1.2	0.2	0.06	0.2	0.05	0.3	0.06	0.2	0.02	0.1	0.02
	LHK-42		3.7	3.6	0.5	1.6	0.3	0.08	0.3	0.06	0.3	0.06	0.2	0.03	0.1	0.02
	LHK-43		0.9	2.1	0.3	1.1	0.2	0.05	0.2	0.04	0.2	0.04	0.1	0.01	0.08	0.01
	LHK-44		2.6	4	0.5	1.9	0.3	0.09	0.3	0.07	0.3	0.07	0.2	0.03	0.2	0.03
	LHK-45		1.1	1.8	0.2	1	0.2	0.05	0.2	0.03	0.2	0.04	0.1	0.02	0.08	0.01
	LHK-46		1.4	2.3	0.3	1.4	0.2	0.06	0.2	0.04	0.2	0.04	0.1	0.01	0.08	0.01
	LHK-47		2.2	2.7	0.4	1.8	0.3	0.08	0.3	0.05	0.3	0.05	0.1	0.02	0.1	0.02
	D115	Siliceous dolomite	0.623	1.124	0.134	0.538	0.096	0.019	0.108	0.014	0.083	0.016	0.048	0.007	0.049	0.007	Zhao, C.Y., Duan, L.Z., Ma, Z.H., 2015. Geochemical characteristics and genesis of cherts of Dengying Formation on the north rim of Yangtze Block. Northwestern Gology 48, 31-42.
	D56		0.376	0.686	0.073	0.289	0.055	0.024	0.054	0.007	0.036	0.007	0.019	0.003	0.018	0.003
	D58	chert	5.723	13.2	1.606	6.968	1.511	0.359	1.696	0.237	1.379	0.258	0.715	0.096	0.577	0.086
	D28		8.202	11.63	1.901	7.887	1.955	0.497	2.365	0.337	1.959	0.378	1.043	0.15	1.028	0.159
	D36		8.249	9.589	1.653	7.32	1.377	0.397	1.858	0.258	1.77	0.408	1.249	0.17	1.018	0.135
	D44		6.01	9.591	1.364	6.261	1.198	0.334	1.413	0.192	1.213	0.276	0.815	0.109	0.704	0.111
Nantuo Formation	TJDST-88	tillite	10.18	14.33	2.41	9.99	2.06	0.52	1.97	0.27	1.33	0.27	0.69	0.09	0.56	0.08	Tian, X.L, Luo, K.L., Wang, S.B., Ni, R.X., 2014. Geochemical characteristics of trace elements and rare earth elements during the Cryogenian － Ediacaran transition in Yangtze Gorges area. Journal of palaeogeography 16, 483-502.
	TJDST-87		7.29	10.37	1.74	7.07	1.49	0.38	1.48	0.21	1.06	0.22	0.56	0.08	0.46	0.07
	TJDST-86		8.3	13.93	2.06	8.29	1.84	0.44	1.89	0.28	1.52	0.32	0.83	0.12	0.82	0.11
	TJDST-85		8.84	14.61	2.24	9.07	1.99	0.47	1.99	0.3	1.62	0.34	0.9	0.13	0.76	0.12
	TJDST-84		9.16	13.9	2.17	8.77	1.92	0.51	1.92	0.28	1.5	0.32	0.84	0.12	0.69	0.11
	TJDST-83		7.82	11.43	1.81	6.99	1.56	0.39	1.55	0.23	1.22	0.26	0.67	0.1	0.58	0.09
	TJDST-82		8.31	11.81	1.84	7.52	1.58	0.42	1.53	0.23	1.22	0.25	0.64	0.09	0.54	0.08
	TJDST-81		9.92	15.32	2.37	9.68	2.11	0.52	2.03	0.31	1.65	0.35	0.92	0.13	0.75	0.12
	TJDST-80		10.52	15.14	2.43	9.85	2.14	0.5	2.04	0.29	1.56	0.33	0.85	0.12	0.71	0.11
	TJDST-79		13.88	20.54	3.42	13.95	3.01	0.72	2.9	0.41	2.11	0.43	1.13	0.15	0.9	0.14
	TJDST-78		11.03	15.2	2.59	10.64	2.24	0.51	2.14	0.3	1.57	0.34	0.86	0.12	0.69	0.1
	TJDST-77		7.58	10.11	1.74	6.96	1.47	0.35	1.38	0.2	1.04	0.22	0.57	0.08	0.47	0.08
	TJDST-76		5.79	6.66	1.24	4.94	0.98	0.26	0.99	0.14	0.69	0.14	0.35	0.05	0.27	0.04
	TJDST-75		6.69	8.11	1.51	6.07	1.26	0.33	1.26	0.17	0.86	0.18	0.45	0.06	0.37	0.06
	TJDST-74		7.52	9.8	1.68	6.79	1.4	0.35	1.38	0.2	1.02	0.22	0.57	0.08	0.47	0.07
	TJDST-73		10.13	12.76	2.31	9.36	1.96	0.47	1.89	0.27	1.36	0.28	0.75	0.1	0.61	0.09
	TJDST-72		8.56	13.07	2.14	8.77	1.82	0.42	1.75	0.24	1.29	0.26	0.7	0.1	0.57	0.09
	TJDST-71		4.76	4.82	1.1	4.36	0.86	0.21	0.76	0.11	0.52	0.11	0.28	0.04	0.21	0.03
	TJDST-70		4.24	4.87	0.97	3.86	0.8	0.2	0.78	0.11	0.56	0.11	0.31	0.04	0.23	0.04
	TJDST-69		3.46	3.6	0.86	3.48	0.72	0.17	0.75	0.11	0.57	0.12	0.31	0.04	0.22	0.03
	TJDST-68		8.53	8.48	1.98	7.93	1.76	0.42	1.83	0.28	1.55	0.34	0.87	0.12	0.62	0.09
	TJDST-67		5.56	6.31	1.28	5.12	1.08	0.27	1.12	0.17	0.91	0.19	0.52	0.07	0.37	0.06
	TJDST-66		5.38	6.38	1.2	4.85	1.05	0.27	1.09	0.15	0.81	0.17	0.45	0.06	0.33	0.05
	TJDST-65		7.27	9.64	1.74	7.04	1.51	0.38	1.55	0.23	1.26	0.27	0.71	0.1	0.55	0.08
	TJDST-64		6.58	9.07	1.61	6.43	1.43	0.39	1.44	0.2	1.05	0.21	0.53	0.07	0.41	0.06
	TJDST-63		7.31	9.96	1.71	6.74	1.5	0.39	1.51	0.22	1.17	0.24	0.64	0.09	0.5	0.08
	TJDST-62		19.19	25.05	4.37	18.05	3.82	0.94	3.82	0.56	2.9	0.6	1.55	0.21	1.16	0.17
	TJDST-61		11.12	15.66	2.64	10.7	2.3	0.61	2.33	0.32	1.67	0.36	0.89	0.12	0.67	0.11
	TJDST-60		10.71	15.55	2.53	10.24	2.23	0.57	2.23	0.31	1.74	0.36	0.97	0.14	0.78	0.12
	TJDST-59		10.07	14.91	2.46	9.96	2.3	0.62	2.11	0.31	1.62	0.34	0.92	0.13	0.75	0.12
	TJDST-58		13.73	19.61	3.26	13.16	2.79	0.8	2.76	0.39	2.05	0.43	1.08	0.15	0.84	0.14
	TJDST-57		9.66	15.73	2.41	9.82	2.31	0.62	2.16	0.32	1.69	0.34	0.92	0.13	0.77	0.12
	TJDST-56		5.35	6.24	1.21	4.84	1.03	0.26	0.98	0.14	0.73	0.15	0.39	0.05	0.3	0.04
	TJDST-55		9.92	11.26	2.07	8.42	1.71	0.43	1.61	0.22	1.14	0.24	0.62	0.09	0.47	0.07
	TJDST-54		8.67	11.44	1.97	7.76	1.57	0.42	1.52	0.21	1.08	0.23	0.6	0.08	0.49	0.07
	TJDST-53		8.49	12.21	1.89	7.47	1.57	0.4	1.54	0.21	1.09	0.22	0.6	0.08	0.48	0.07
	TJDST-52		9.24	14.8	2.19	8.5	1.81	0.45	1.82	0.26	1.46	0.31	0.84	0.12	0.67	0.11
	TJDST-51		8.62	14.13	2.04	8.06	1.79	0.47	1.77	0.27	1.44	0.31	0.83	0.12	0.68	0.11
	TJDST-50		9.28	14.81	2.26	9.22	2.07	0.59	1.95	0.29	1.55	0.33	0.87	0.13	0.74	0.11
	TJDST-49		8.39	13.67	1.97	7.82	1.8	0.49	1.7	0.26	1.36	0.3	0.8	0.12	0.66	0.11
	TJDST-48		7.33	10.91	1.69	6.58	1.37	0.36	1.41	0.2	1.07	0.22	0.59	0.08	0.5	0.08
	TJDST-47		9.54	14.65	2.27	8.96	1.94	0.51	1.92	0.27	1.44	0.31	0.81	0.12	0.69	0.1
	TJDST-46		9.07	14.65	2.17	8.73	2.01	0.57	1.98	0.28	1.49	0.31	0.82	0.12	0.7	0.11
	TJDST-45		8.85	14.32	2.08	8.27	1.89	0.48	1.93	0.28	1.58	0.33	0.86	0.13	0.73	0.12
	TJDST-44		9.82	15.84	2.33	9.39	2.06	0.55	2.1	0.31	1.63	0.35	0.92	0.14	0.78	0.12
	TJDST-43		5.46	9.71	1.07	3.84	0.8	0.27	0.82	0.11	0.56	0.12	0.31	0.04	0.25	0.04
	TJDST-42		4.89	6.73	1.03	3.73	0.77	0.23	0.75	0.11	0.56	0.12	0.3	0.04	0.25	0.04
	TJDST-41		6.35	10.81	1.42	5.54	1.18	0.3	1.14	0.16	0.84	0.17	0.46	0.07	0.38	0.06
	TJDST-40		5.05	8.92	0.98	3.47	0.7	0.26	0.71	0.09	0.48	0.1	0.26	0.04	0.21	0.04
	TJDST-39		7.05	12.46	1.65	6.29	1.36	0.34	1.3	0.19	1.01	0.21	0.57	0.08	0.47	0.07
	TJDST-38		6.12	8.34	1.19	4.41	0.89	0.31	0.82	0.11	0.53	0.11	0.27	0.04	0.21	0.03
	TJDST-37		6.86	9.94	1.53	5.88	1.21	0.29	1.09	0.15	0.72	0.14	0.36	0.05	0.29	0.04
	TJDST-36		4.99	7.32	1.08	4.22	0.83	0.21	0.8	0.1	0.5	0.11	0.26	0.04	0.19	0.03
	TJDST-35		5.11	7.67	1.37	6.01	1.41	0.36	1.47	0.2	1.13	0.26	0.69	0.09	0.46	0.07
	TJDST-34		3.58	5.87	0.82	3.11	0.72	0.24	0.7	0.1	0.53	0.12	0.33	0.04	0.24	0.04
	TJDST-33		5.25	8.97	1.3	5.29	1.16	0.32	1.22	0.18	0.95	0.23	0.57	0.08	0.45	0.07
	TJDST-32		6.22	10.2	1.57	6.55	1.44	0.37	1.5	0.22	1.17	0.27	0.72	0.1	0.57	0.08
	TJDST-31		2.3	4.48	0.56	2.11	0.57	0.22	0.48	0.07	0.37	0.09	0.24	0.03	0.18	0.03
	TIDST-30		5.97	9.73	1.48	6.04	1.37	0.36	1.38	0.2	1.13	0.25	0.69	0.09	0.52	0.08
	TJDST-29		10.18	16.31	2.52	10.46	2.3	0.64	2.36	0.34	1.87	0.4	1.06	0.15	0.8	0.12
	TJDST-28		3.63	6.12	0.86	3.24	0.84	0.28	0.74	0.11	0.62	0.14	0.39	0.06	0.29	0.05
	TJDST-27		8.72	14.97	2.21	9.02	2.07	0.54	2.18	0.32	1.72	0.39	1.04	0.15	0.82	0.12
	TJDST-26		6.94	11.99	1.64	6.64	1.48	0.42	1.52	0.22	1.19	0.26	0.69	0.1	0.51	0.08
	TJDST-25		6.78	11.7	1.66	6.71	1.65	0.51	1.57	0.22	1.22	0.27	0.71	0.1	0.55	0.09
	TJDST-24		7.87	15.04	1.98	8.15	2.05	0.65	1.93	0.28	1.55	0.34	0.93	0.13	0.69	0.11
	TJDST-23		5.76	8.69	1.32	5.17	3.5	2.03	1.4	0.21	1.15	0.27	0.73	0.1	0.5	0.12
	TJDST-22		6.85	12.53	1.69	6.71	1.82	0.61	1.63	0.23	1.25	0.28	0.74	0.1	0.57	0.09
	TJDST-21		7.42	11.39	1.74	7.23	1.79	0.59	1.62	0.24	1.25	0.27	0.7	0.1	0.54	0.08
	TJDST-20		10.73	16.93	2.64	10.65	2.43	0.64	2.38	0.34	1.8	0.39	1.02	0.14	0.8	0.12
	TJDST-19		8.6	11.35	1.67	6.27	1.32	0.41	1.37	0.2	1.11	0.23	0.61	0.08	0.49	0.08
	TJDST-18		7.75	11.36	1.51	5.6	1.19	0.39	1.28	0.18	0.99	0.21	0.55	0.08	0.45	0.07
	TJDST-17		7.07	10.98	1.38	5.13	1.06	0.36	1.15	0.15	0.78	0.17	0.45	0.06	0.35	0.06
	TJDST-16		11.25	18.6	2.77	10	2.04	0.58	1.82	0.24	1.06	0.21	0.51	0.07	0.43	0.07
	TJDST-15		5.77	9.35	1.36	5.07	1.1	0.31	1.13	0.18	0.93	0.21	0.53	0.08	0.47	0.08
	TIDST-14		9.89	17.93	2.51	9.64	2.24	0.59	2.26	0.38	1.86	0.41	1.06	0.16	0.94	0.15
	TJDST-13		7.84	12.39	1.73	6.08	1.27	0.34	1.19	0.17	0.83	0.19	0.47	0.07	0.4	0.07
	TJDST-12		6.52	11.63	1.68	6.25	1.35	0.34	1.39	0.22	1.14	0.25	0.64	0.1	0.57	0.09
	TJDST-11		7.69	13.97	1.94	7.06	1.62	0.4	1.61	0.25	1.24	0.27	0.65	0.1	0.58	0.09
	TJDST-10		8.1	13.63	1.92	7.09	1.71	0.47	1.6	0.25	1.23	0.27	0.69	0.11	0.63	0.11
	TJDST-9		17	30.46	4.37	15.26	2.92	0.76	2.37	0.29	1.16	0.23	0.56	0.08	0.47	0.08
	TJDST-8		5.39	10.11	1.35	4.89	1.13	0.26	1.11	0.17	0.84	0.19	0.48	0.07	0.4	0.07
	TJDST-7		14.45	27.41	3.71	13.1	2.5	0.56	2.18	0.27	1.17	0.23	0.56	0.08	0.43	0.07
	TJDST-6		3.9	8.29	1	3.62	0.94	0.22	0.91	0.14	0.71	0.16	0.43	0.06	0.37	0.06
	TJDST-5		13.24	22.95	2.96	10.42	1.9	0.46	1.8	0.25	1.14	0.25	0.62	0.09	0.46	0.08
	TJDST-4		4.72	8.02	0.92	3.33	0.8	0.19	0.91	0.15	0.77	0.18	0.48	0.08	0.38	0.07
	TJDST-3		4	6.44	0.94	3.41	0.78	0.23	0.85	0.13	0.66	0.15	0.42	0.06	0.39	0.07
	TIDST-2		2.83	7.07	0.69	2.3	1.04	0.51	0.51	0.07	0.39	0.1	0.26	0.04	0.26	0.06
	TJDST-1		3.73	7.85	0.89	2.97	0.68	0.17	0.67	0.1	0.53	0.12	0.34	0.06	0.33	0.05
	TJDST-0		2.11	4.34	0.45	1.37	0.33	0.11	0.32	0.05	0.28	0.07	0.2	0.03	0.19	0.04
	TJNT-1		26.54	42.93	7.22	25.93	5.75	1.25	5.55	0.84	4.22	0.95	2.37	0.38	2.12	0.35
	TJNT-2		21.73	39.24	6.15	22.07	4.89	1.1	4.84	0.75	3.69	0.84	2.12	0.34	1.97	0.33
	TJNT-3		19.88	34.64	5.24	19.31	4.2	0.95	4.15	0.64	3.2	0.73	1.87	0.31	1.77	0.29
	TJNT-4		24.52	41.79	5.94	21.44	4.96	1.26	4.46	0.7	3.5	0.8	2.06	0.34	1.98	0.33
	TJNT-5		27.32	47.23	6.78	23.32	5.15	1.15	4.94	0.76	3.81	0.86	2.24	0.36	2.13	0.35
	TJNT-6		27.22	45.14	6.79	23.28	5.1	1.11	4.86	0.74	3.66	0.83	2.16	0.34	1.96	0.33
	TINT-7		30.65	50.66	7.46	26.07	5.57	1.26	5.37	0.81	4.04	0.93	2.42	0.4	2.3	0.39
	TINT-9		26.82	47.41	6.91	23.9	5.3	1.26	4.91	0.77	3.83	0.88	2.3	0.37	2.15	0.35
	TJNT-10		20.29	36.88	4.93	19.67	3.96	0.94	4.03	0.54	3.11	0.62	1.8	0.27	1.73	0.27
	TJNT-11		27.02	44.14	6.49	22.98	4.9	1.18	4.74	0.72	3.6	0.83	2.13	0.35	1.98	0.33
	TJNT-13		24.04	42.88	5.85	20.33	4.38	1.05	4.23	0.66	3.26	0.76	2	0.32	1.9	0.32
	TJNT-15		27.94	46.93	6.87	23.33	5.15	1.17	4.89	0.73	3.65	0.83	2.16	0.34	2.05	0.34
	TJNT-19		26.63	46.02	6.45	21.53	4.78	1.12	4.57	0.7	3.48	0.8	2.04	0.33	1.93	0.31
Zhaojiaba Formation	WC01-01	dolomite	7.26	13.24	1.72	6.95	1.4	0.32	1.15	0.21	1.33	0.24	0.71	0.11	0.59	0.1	Lin, L.B., Yu, Y., Huang, Q.C., Shi, H., 2017. The geochemical characteristics and sedimentary environment analysis of Ordovician in Wangcang region, northern Sichuan Basin. Acta Petrologica Sinica 33, 1272-1284.
	WC01-02	arenaceous dolomite	27.72	39.44	3.94	14.13	1.82	0.39	1.81	0.22	1.09	0.2	0.62	0.09	0.56	0.09
	WC01-03	arenaceous dolomite	9.37	17.18	2.05	8.11	1.49	0.28	1.17	0.2	1.13	0.21	0.59	0.09	0.56	0.08
	WC01-04	limestone	18.87	19.27	4.02	14.71	2.63	0.49	2.29	0.34	1.85	0.34	1.01	0.15	0.93	0.13
	WC01-05	stromatolitic limestone	36.81	163.58	6.9	31.76	5.46	0.98	4.47	0.65	3.63	0.64	1.82	0.27	1.69	0.24
	WC01-06	bioclastic limestone	18.5	33.66	3.58	14.25	2.51	0.49	2.26	0.32	1.84	0.33	0.96	0.15	0.85	0.13
	WC01-07	limestone	15.47	27.22	3.18	12.97	2.51	0.64	2.3	0.34	1.86	0.35	0.96	0.14	0.84	0.12
	WC02-01	argillaceous dolomite	5.78	10.33	1.3	5.04	0.95	0.22	0.82	0.14	0.85	0.15	0.44	0.07	0.41	0.06
	WC02-02	arenaceous dolomite	4.94	8.77	1.05	3.98	0.7	0.14	0.61	0.1	0.57	0.1	0.29	0.04	0.21	0.04
	WC02-03	dolomite	4.6	8.27	0.9	3.48	0.65	0.14	0.6	0.09	0.55	0.11	0.31	0.05	0.32	0.05
	WC02-04	arenaceous dolomite	2.36	3.97	0.46	1.68	0.28	0.05	0.25	0.04	0.21	0.04	0.14	0.02	0.1	0.02
	WC02-05	limestone	1.35	2.51	0.28	1.03	0.18	0.04	0.15	0.03	0.14	0.02	0.08	0.01	0.09	0.01
Magmatic Rocks	EL-1	Trondhjemite	12.3	23	2.5	9.19	1.72	0.55	1.71	0.28	1.88	0.39	1.17	0.18	1.18	0.19	Ao, W.H., Zhang, Y.K., Zhang, R.Y., Zhao, Y., Sun, Y., 2014. Neoproterozoic Crustal Accretion of the Northern Margin of Yangtze Plate: Constrains from Geochemical Characteristics, LA-ICP-MS Zircon U-Pb Chronology and Hf Isotopic Compositions of Trondhjemite from Zushidian Area, Hannan Region. Geological Review 60, 1393-1408.
	EL-2		13.7	26.5	2.75	10	1.68	0.61	1.44	0.2	1.18	0.24	0.72	0.11	0.74	0.12
	EL-3		11.7	22	2.36	8.55	1.49	0.54	1.24	0.17	0.94	0.18	0.51	0.08	0.56	0.087
	EL-4		14.5	27.4	2.83	10.4	1.69	0.63	1.5	0.21	1.27	0.25	0.8	0.12	0.8	0.13
	EL-5		12.5	23	2.45	8.93	1.58	0.62	1.51	0.24	1.58	0.34	1.05	0.16	1.04	0.16
	DHS-1	amphibole gabbro	6.58	15.1	2.15	10.4	2.68	0.91	2.75	0.44	2.74	0.56	1.59	0.23	1.48	0.22	Zhang, Y.K., 2014. Petrology, geochemistry and zircon geochronology of the Dahanshan gabbro in the northern margin of the Yangtze Block. Northwestern University.
	DHS-2		6.86	17.4	2.51	12.5	3.32	1.03	3.45	0.56	3.56	0.74	2.1	0.31	1.94	0.29
	DHS-3-1	perilla amphibole gabbro	4.96	12.2	1.68	8.02	2.14	0.79	2.56	0.41	2.63	0.56	1.6	0.23	1.48	0.22
	DHS-3-2		5.09	13	1.88	9.2	2.44	0.92	2.9	0.46	2.99	0.63	1.79	0.26	1.65	0.24
	DHS-4-1		5.36	13.8	2.02	10.2	2.78	1	3.03	0.53	3.4	0.72	1.99	0.29	1.85	0.27
	DHS-4-2		5.36	13.8	2.04	10.2	2.78	0.99	3.06	0.52	3.34	0.71	2.02	0.29	1.84	0.27
	DHS-4-3		4.24	10.3	1.49	7.05	1.98	0.73	2.16	0.37	2.44	0.5	1.45	0.21	1.35	0.2
	DHS-4-4		4.3	10.4	1.5	7.08	1.92	0.72	2.12	0.37	2.36	0.5	1.43	0.21	1.33	0.2
	DHS-4-5		4.22	10.2	1.48	7.05	1.95	0.74	2.16	0.37	2.37	0.5	1.45	0.21	1.35	0.2
	DHS-6		5.82	14.9	2.21	10.7	2.95	1.03	3.18	0.54	3.44	0.73	2.07	0.3	1.92	0.28
	DHS-7-1		6.78	14.3	2.02	9.41	2.57	0.83	2.76	0.46	2.99	0.63	1.79	0.27	1.64	0.24
	DHS-7-2		4.7	11.1	1.62	7.69	2.09	0.75	2.25	0.38	2.47	0.52	1.5	0.22	1.4	0.21
	DHS-9-1	amphibole gabbro	8.25	21.1	3.1	14.7	3.75	1.24	3.78	0.61	3.85	0.79	2.27	0.33	2.07	0.31
	DHS-9-2		6.62	16.3	2.46	11.5	3.18	1.12	3.41	0.58	3.65	0.77	2.23	0.33	2.04	0.31
	DHS-10		6.54	16.2	2.45	11.7	3.19	1.11	3.45	0.58	3.76	0.78	2.26	0.34	2.11	0.31
	1	basalt	33.5	71.5	10.3	45.5	11.5	3.7	10.9	2.13	13.6	3.18	7.87	1.43	9.18	1.39	Hu, Z.X., Chen, C., Mao, X.W., Yang, Q.X., Deng, Q.Z., Kong, L.Y., Yang, C., 2017. The Qingbaikoui Tumen Formation-complex island arc volcanic-clasitc rocks on the northern margin of Yangtze Block and its significance. Journal of Stratigraphy 41, 304-317.
	2		30	65.1	9.36	41.7	10.5	3.39	9.94	1.95	12.3	2.89	7.27	1.32	8.32	1.27
	3		34.3	73.7	10.6	47.2	11.8	3.8	11.1	2.18	13.9	3.22	8.06	1.46	9.31	1.43
	4		11.7	27.3	4.06	19	5.35	1.56	5.32	1.1	7.14	1.71	4.28	0.78	4.93	0.77
	5		5.5	13.3	2.12	10.5	3.16	1.02	3.24	0.69	4.53	1.09	2.7	0.49	34	0.47
	6		32.6	69.8	9.9	43.5	10.8	3.46	10.1	1.97	12.3	2.88	7.21	1.31	8.3	1.3
	7		13.35	35.43	4.29	21.7	6.2	1.33	7.25	1.3	9.36	1.84	5.03	0.78	5.57	0.89
	8		33.73	79.91	8.63	44.44	11.44	3.4	12.62	2.39	16.64	3.22	8.8	1.29	9.39	1.5
	9		28.4	67.5	10.8	51.6	13.8	4.41	12.8	2.46	15.4	3.57	8.71	1.52	9.42	1.45
	10		9.5	22.23	3.55	16.21	4.49	1.38	5.15	0.89	5.66	1.15	3.3	0.48	31	0.44
	11		9.6	23.83	3.86	18.97	5.46	1.7	6.54	1.09	7.03	1.4	4.03	0.57	3.39	0.5
	12		11.69	22.77	3.28	13.52	3.28	1.03	3.46	0.55	3.47	0.67	1.9	0.26	1.52	0.21
	13		6.83	19.66	36	15.2	4.37	1.49	5.25	0.93	5.72	1.11	3.21	0.47	2.82	0.43
	14	andesite	30.9	65.5	9.23	40.5	10	3.24	9.47	1.83	11.6	2.67	6.72	1.21	7.76	1.19
	15		27.1	59.9	8.54	37.1	9.35	30	8.75	1.72	11	2.58	6.52	1.18	7.52	1.17
	16		27.4	58.6	8.22	36	9.1	2.94	8.66	1.7	10.9	2.56	6.39	1.16	7.39	1.14
	17		32.33	77.81	8.47	43.25	11.27	3.31	12.81	2.1	14.58	2.62	7.11	0.99	7	1.16
	18		27.96	64.99	7.05	34.79	8.38	1.9	8.6	1.58	10.68	1.82	4.6	0.71	5.17	0.8
	19		29.47	67.56	8.39	37.96	9.63	2.25	11.03	1.91	11.76	2.49	6.69	1.13	6.67	1.07
	20		27.84	64.6	8.13	39.73	11.83	2.96	12.17	2.22	14.39	3.15	9.44	1.48	8.91	1.26
	21		40.07	83.81	11.62	46.42	12.06	2.11	11.9	2.15	139	2.43	6.42	0.96	5.7	0.79
	22		20.4	47	7.06	32.8	8.41	2.69	7.8	1.48	9.37	2.14	5.23	0.93	5.71	0.87
	23	rhyolite	30.51	69.29	10.12	41.43	11.46	1.44	11.4	2.17	13.73	2.68	7.8	1.29	7.97	1.2
	24		52.42	129.31	19.5	82.04	23.7	3.58	23.13	4.3	26.15	4.94	13.35	2.09	12.71	1.89
	25	dacite	29.6	70.74	9.83	39.9	9.42	1.3	9.14	1.49	9.4	1.84	5.32	0.82	5.1	0.76
	26	rhyolite	30.78	71.05	10.03	41.41	10.14	1.33	10.45	1.83	12.01	2.44	7.42	1.12	7.04	1.02
	27	dacite	20.63	49.65	6.78	27.9	6.95	0.95	7.3	1.33	9.06	1.85	5.52	0.84	5.01	0.76
	28	dacite	96.26	175.54	23.11	77.39	13.33	1.58	11.47	1.92	11.27	2.3	7	1.07	6.87	1.07
	29	rhyolite	80.88	145.92	20.6	72.6	14.13	2.02	8.52	1.24	6.65	1.25	3.71	0.62	4.06	0.65
Mianlue Suture Zone	15QL05	Plagiogranite	8.5	18	2.09	8.6	1.71	0.52	1.83	0.29	1.85	0.38	1.17	0.19	1.23	0.21	Wu, P., Zhang, S., Zheng, Y., Fu, B., Liang, T., 2019. Amalgamation of South China into Rodinia during the Grenvillian accretionary orogeny: Geochemical evidence from Early Neoproterozoic igneous rocks in the northern margin of the South China Block. Precambrian Research, 321, 221-243.
	15QL06		17.1	36.4	4.35	17.7	3.58	1.02	3.34	0.55	3.45	0.7	2.06	0.31	2.08	0.32
	15QL07		5.5	12.5	1.44	6	1.28	0.45	1.22	0.19	1.23	0.26	0.8	0.13	0.87	0.14
	15QL 10	Andesite	13.4	32.7	3.99	17.7	4.69	1.3	4.81	0.81	5.09	1.04	2.95	0.45	3.09	0.47
	15QL11		12.7	27.7	3.57	15.5	3.9	1.25	4	0.66	3.93	0.81	2.22	0.34	2.21	0.35
	15QL12		17.1	37.4	4.58	19.8	5.02	1.49	5.07	0.83	5.19	1	2.89	0.44	2.82	0.44
	15QL13		14.1	31.9	4.13	18.1	4.62	1.18	5.16	0.83	5.16	1.08	3.24	0.48	3.21	0.53
	15QL15		17.1	38	4.83	21.9	5.5	1.61	5.77	0.89	5.52	1.14	3.24	0.51	3.37	0.54
	15QL 09	Gabbro	7.9	17.7	2.31	10.6	2.96	0.93	3.21	0.51	3.09	0.63	1.75	0.26	1.6	0.25
	15QL 16	Gabbroic-diorite	17	37.3	4.79	20.5	4.6	1.37	4.31	0.62	3.45	0.63	1.66	0.26	1.59	0.24
	15QL18		17	38.1	4.68	20.3	4.78	1.46	4.6	0.66	3.72	0.73	1.9	0.25	1.91	0.29
	15QL19		12.1	26.2	3.53	15.9	4.16	1.36	4.61	0.73	4.67	0.91	2.65	0.28	2.53	0.41
	15QL20		13.8	33	3.97	17.9	4.54	0.98	4.34	0.72	4.63	0.88	2.52	0.38	2.53	0.42
	GLS-02	chert	34.6	70.1	7.64	29.9	5.53	0.96	7.87	1	5.42	1.03	3.31	0.46	2.97	0.47	Ji, X.Z., Li, N., Zhang, C., Qiu, K.F., Hua, B., Yu, J.Y., Wu, C.J., Han, R., 2014. Elemental geochemistry characteristics and forming environment of cherts in the Mianlue tectonic zone. Acta Petrologica Sinica 30, 2619-2630.
	GLS-03		39.2	78.2	9.32	38	6.93	1.41	8.93	1.23	6.43	1.22	3.81	0.48	3.41	0.5
	GLS-04		34.7	72.6	7.69	29.4	5.56	1.1	6.25	1.02	5.6	1.1	3.46	0.51	3.45	0.54
	TJB-01		5.72	12.6	1.3	4.77	0.9	0.16	0.86	0.12	0.61	0.1	0.31	0.04	0.24	0.04
	TJB-02		47.4	91.3	10.9	46.5	8.46	1.28	9.27	1.45	7.82	1.55	4.79	0.62	4.16	0.61
	TJB-03		7.97	16.7	1.7	6.14	1.17	0.22	1.13	0.14	0.53	0.08	0.25	0.03	0.19	0.03
	GTW-01		6.9	14.7	1.39	4.95	0.92	0.17	1.09	0.12	0.49	0.08	0.25	0.02	0.16	0.02
	GTW-02		7.57	15.7	1.57	5.68	1.02	0.17	1.07	0.15	0.71	0.11	0.36	0.04	0.29	0.04
	GTW-03		10.6	23.4	2.31	8.1	1.43	0.25	1.86	0.25	1.14	0.21	0.71	0.09	0.61	0.1
	JZS-D2-01		6.59	14.5	1.49	5.41	0.93	0.15	0.99	0.13	0.64	0.12	0.39	0.05	0.36	0.05
	JZS-D2-02		1.1	2.62	0.36	2.26	1.22	0.42	1.62	0.22	1.08	0.17	0.46	0.05	0.33	0.05
	MY-S17*	syenites	154	360	29.5	97.2	12.7	3.59	12.1	1.06	4.47	0.84	2.4	0.31	1.94	0.29	Xu, C., Chakhmouradian, A.R., Taylor, R.N., Kynicky, J., Li, W., Song, W., Fletcher, I.R., 2014. Origin of carbonatites in the South Qinling orogen: Implications for crustal recycling and timing of collision between the South and North China Blocks. Geochimica et Cosmochimica Acta, 143, 189-206.
	MY-S18		462	800	70.9	253	37.1	12.2	43	4.58	20.3	3.81	9.67	1.17	7.27	0.92
	MY-S19		147	306	32	111	14.9	3.77	13.5	1.06	3.83	0.75	2.22	0.27	1.77	0.25
	MY-S20		42.2	79.7	9.03	36	7.57	5	9.44	0.7	3.43	0.7	1.86	0.24	1.48	0.2
	21	magmatic rocks	1.33	4.81	0.97	5.73	2.34	0.87	3.63	0.63	4.4	0.97	2.94	0.44	2.95	0.43	Xu, J.F., Yu. X.Y., Li, X.H., Han, Y.W., Sheng, J.H., Zhang, B.R., 1997. Discovery of highly depleted N-MORB type volcanic rocks: new evidence for the existence of Mian-Lue paleo-ocean basin. Chinese Science Bulletin 42, 2414-2418.
	22		1.38	4.84	0.96	5.71	2.3	1.02	3.65	0.63	4.3	0.95	2.85	0.43	2.91	0.43
	23		1.22	4.46	0.88	5.24	2.11	0.81	3.14	0.5	3.2	0.66	2.07	0.31	2.04	0.3
	24		0.96	3.47	0.7	4.29	2	0.73	3.79	0.69	4.96	1.11	3.31	0.49	3.15	0.45
	25		1.32	4.51	0.85	4.87	1.78	0.64	2.92	0.55	3.93	0.9	2.68	0.39	2.58	0.38
	26		1.71	6.03	1.16	6.73	2.86	1.04	4.09	0.71	4.81	1.04	3.09	0.46	3.09	0.44
	28		1.66	5.84	1.14	6.5	2.44	0.8	3.71	0.7	4.73	1.09	2.95	0.46	2.96	0.45
	M039–2	meta-volcanic rocks	25.24	51.1	5.39	19	2.98	0.76	2.64	0.38	2.06	0.46	1.21	0.17	1.13	0.18	Xu. T., Pei, X.Z., Li, R.B., Li, Z.C., Pei, L., Liu, C.J., Chen, Y.X., Wang, X.W., Yang, J., Hu, N., Geochemical characteristics，LA-ICP-MS zircon U-Pb dating and tectonic significance of Zhangyangou bimodal volcanic rocks in Hengxianhe area, Mian-Lue tectonic zone. Geology in China 40, 1777-1792.
	M039–3		25.37	47.36	5.33	18.87	2.85	0.58	2.03	0.23	1.01	0.2	0.51	0.07	0.51	0.08
	M039–4		35.94	72.18	7.94	28.25	4.29	0.91	3.39	0.41	1.94	0.39	0.94	0.13	0.74	0.1
	M040–2		45.4	96.26	11.38	45.56	7.95	1.89	6.68	0.88	4.34	0.88	2.31	0.31	1.91	0.3
	M040–3		27.31	54.51	6.99	29.18	5.67	1.63	5.25	0.73	3.84	0.83	2.19	0.3	1.91	0.31
	M040–4		46.19	114.9	16.19	68.55	12.63	2.34	10.75	1.48	7.21	1.43	3.59	0.46	2.86	0.44
	M040–5		22.26	48.55	6.48	27.9	5.48	1.54	5.02	0.72	3.83	0.84	2.23	0.31	2.05	0.33
	M040–7		23.35	50.02	6.71	29.32	5.68	1.54	5.2	0.75	4.11	0.91	2.43	0.33	2.12	0.33
	M040–8		11.65	38.83	3.18	13.39	2.62	0.64	2.19	0.28	1.31	0.25	0.63	0.09	0.52	0.08
	M040–9		13.25	29.19	3.45	13.42	2.26	0.57	1.75	0.2	0.95	0.18	0.46	0.06	0.38	0.06
	WL03	basalt	17.2	40.9	5.7	21.8	5.89	2.01	6.6	1.1	6.51	1.3	4.05	0.59	3.23	0.49	Lai, S.C., Zhang, G.W., 2002. Geochemistry of the volcanic rock association from Wuliba area in Mianlue suture zone, southern Qinling and its tectonic significance. Geotectonic et Metallogenia 26, 43-50.
	WL04		15.7	37.6	5.21	19.6	5.21	1.93	6.17	0.99	6.02	1.21	3.51	0.48	3.03	0.42
	WL05		17.2	41.9	5.74	22.5	5.85	2.07	6.85	1.08	6.55	1.31	3.94	0.55	2.97	0.41
	WL06	dacitic rhyolite	32.6	69.7	7.79	26.7	5.41	1.43	5.25	0.82	4.83	0.94	2.89	0.42	2.69	0.39
	WL08		35.9	75.5	8.05	28.6	5.76	1.23	5.43	0.82	5.03	0.98	3.28	0.47	3.01	0.43
	WL15		30.8	67.7	8.03	27.3	5.46	1.15	4.87	0.78	4.83	0.95	3.25	0.48	2.97	0.42
	WL16		27.5	54.8	7.37	29.4	6.36	1.36	6.25	0.99	6.09	1.19	4.04	0.52	3.38	0.49
	WL18		32	73.1	7.05	26.3	4.85	1.1	4.52	0.71	4.14	0.83	2.67	0.39	2.56	0.36
	WL22		27.2	52.9	6.08	23.1	4.68	1.12	4.13	0.66	4.01	0.83	2.66	0.4	2.44	0.35
	680-1	diabase dyke	31.95	69.68	8.88	42.65	9.03	3.33	8.5	1.2	6.36	1.18	2.83	0.36	2.12	0.3	Chen, H., Tian, M., Wu, G.L., Hu, J.M., 2014. The Early Paleozoic Alkaline and Mafic Magmatic Events in Southern Qinling Belt, Central China: Evidences for the Break-up of the Paleo-Tethyan Ocean. Geological Review 60, 1437-1452.
	680-2		23.63	51.81	6.84	33.55	7.49	2.91	7.12	1.02	5.46	1	2.42	0.31	1.79	0.26
	680-3		31.48	67.41	8.81	40.76	8.53	3.27	7.81	1.1	5.89	1.1	2.64	0.34	1.98	0.28
	680-4		29.5	64.52	8.4	40.44	8.8	3.84	8.21	1.18	6.26	1.17	2.8	0.34	2.06	0.29
	680-5		55.51	118.03	14.94	68.49	14.38	5.85	13.2	1.86	9.86	1.83	4.35	0.55	3.25	0.46
	680-6		24.65	52.88	6.76	32.01	6.69	2.62	6.15	0.87	4.7	0.87	2.1	0.27	1.61	0.22
	680-7		31.31	67.47	8.58	40.88	8.65	3.28	8.16	1.15	6.1	1.14	2.74	0.34	2.06	0.29
	680-8		27.98	61.21	7.81	37.19	7.89	3.05	7.22	1.03	5.46	1.01	2.44	0.31	1.87	0.26
	256-1	Gabbro dyke	15.88	35.81	4.61	20.98	5.23	1.52	5.65	0.93	5.6	1.19	3.13	0.46	2.83	0.41
	257-1		28.99	66.82	9.02	42.2	8.99	2.75	8.27	1.15	5.94	1.11	2.64	0.34	1.95	0.27
	268-1		20.8	45.81	6.04	28.01	6.15	2.35	5.82	0.84	4.36	0.82	1.9	0.25	1.4	0.2
	M125-1	volcanic rocks	22.08	43.08	5.53	22.39	4.58	1.14	4.52	0.72	3.99	0.88	2.41	0.35	2.29	0.36	Xu. T., Pei, X.Z., Li, R.B., Liu, C.J., Chen, Y.X., Li, Z.C., Pei, L., Zuo, W.Q., Ages and Geochemical Features of the Heigouxia Volcanic Ｒocks in the Mianxian—Lüeyang Area of South Qinling Orogen: Evidence for Existence and Subduction of Neoproterozoic Mianxian-Lüeyang Ocean. Geological Review 63, 375-394.
	M1253		16.41	36.29	4.48	18.92	3.96	1.11	3.88	0.62	3.58	0.79	2.14	0.29	1.87	0.29
	M125-4		20.29	39.92	4.99	20.03	3.97	0.97	3.72	0.54	3.03	0.65	1.74	0.25	1.62	0.25
	M126-1		5.76	15.45	2.35	12.57	3.73	1.36	4.71	0.81	4.84	1.09	2.96	0.41	2.66	0.43
	M126-2		3.7	10.84	1.88	11.3	4.13	1.61	6.05	1.13	7.09	1.65	4.52	0.66	4.21	0.66
	M126-3		4.11	11.66	1.95	11.19	3.85	1.57	5.54	1.01	6.33	1.46	4.06	0.59	3.71	0.59
	M1264		2.38	7.2	1.26	7.37	2.74	1.11	4.14	0.79	4.94	1.16	3.13	0.44	2.85	0.45
	M126-5		4.28	12.25	2.02	11.44	3.99	1.52	5.58	1.03	6.37	1.48	4.03	0.58	3.74	0.59
	M126-7		4.89	14.61	2.45	13.93	4.99	1.73	7.05	1.31	8.15	1.89	5.16	0.73	4.74	0.75
	M126-8		3.7	10.73	1.76	9.76	3.29	1.22	4.56	0.83	5.17	1.18	3.26	0.46	2.94	0.46
	M126-9		3.66	10.54	1.72	9.66	3.41	1.16	4.58	0.84	5.31	1.22	3.29	0.48	3.06	0.48
	M126-10		6.95	18.53	2.78	14.78	4.48	1.57	5.71	1.04	6.3	1.45	3.97	0.58	3.77	0.59
	M092-2	andesite	16.43	30.43	3.28	12.45	2.26	0.78	2.14	0.32	1.83	0.42	1.11	0.17	1.14	0.2	Xu, T., Pei, X.Z., Liu, C.J., Chen, Y.X., Li, R.B., Li, Z.C., Pei, L., 2016. Geochemical Features and Zircon LA-ICP-MS U-Pb Ages of the Neoproterozoic Zhangergou Metamorphic Andesitic Ｒocks in the Mianxian-Lüeyang Area of South Qinling Orogen: Evidence for Amalgamation of Ｒodinia Supercontinent. Geological Review 62, 434-450.
	M092-4		16.36	30.99	3.43	12.89	2.29	0.77	2.26	0.34	1.92	0.42	1.17	0.18	1.16	0.19
	M092-5		15.2	29.68	3.23	12.22	2.15	0.75	2.16	0.32	1.78	0.4	1.11	0.16	1.1	0.19
	M092-6		14.56	31.04	3.05	11.59	2.14	0.75	2.14	0.32	1.83	0.41	1.13	0.17	1.12	0.19
	M092-7		13.55	29.51	2.88	11.25	2.11	0.74	2.06	0.32	1.81	0.4	1.11	0.17	1.12	0.19
	M092-8		17.61	30.92	3.33	12.42	2.18	0.76	2.12	0.32	1.76	0.4	1.11	0.17	1.16	0.19

## Sheet: S5
Group	sample number	lithotype	La	Ce	Pr	Nd	Sm	Eu	Gd	Tb	Dy	Ho	Er	Tm	Yb	Lu	Reference
Liu Ling Group	B26	siltstones	45.4	88.4	10.3	37.8	6.94	1.3	6.24	0.92	4.7	0.99	2.91	0.43	2.85	0.44	Yan, Z., Wang, Z., Yan, Q., Wang, T., Xiao, W., Li, J., Han, F., Chen, J., Yang, Y., 2006. Devonian Sedimentary Environments and Provenance of the Qinling Orogen: Constraints on Late Paleozoic Southward Accretionary Tectonics of the North China Craton. International Geology Review 48, 585-618.
	B32		46.7	83.9	10.5	37.9	6.53	1.16	5.56	0.78	3.98	0.83	2.44	0.37	2.46	0.38
	B33		52.4	96.4	12	41.7	7.58	1.18	6.56	0.92	4.85	1.01	2.98	0.44	2.93	0.46
	B34		48.7	92.1	11.2	40.1	7.43	1.34	6.37	0.92	4.73	0.98	2.91	0.42	2.88	0.43
	B36		44.9	84.4	10.1	36.3	6.7	1.21	5.81	0.87	4.41	0.93	2.72	0.41	2.7	0.42
	B1022		42.23	82.15	8.258	32.58	6.113	1.42	5.319	1.039	4.752	0.866	2.61	0.335	2.6	0.375
	B1023		40.27	77.75	7.882	30.79	5.497	1.245	4.614	0.86	3.998	0.688	1.945	0.26	1.793	0.251
	B085		42.53	83.4	8.412	33.65	6.03	1.39	5.227	0.951	4.856	0.883	2.67	0.431	2.753	0.394
	B088		42.97	85.33	8.367	32.18	5.762	1.23	5.141	1.028	4.789	0.89	2.827	0.392	2.894	0.425
	B1048		32.65	63.3	6.253	25.97	4.944	1.032	4.47	0.83	4.222	0.785	2.307	0.301	2.272	0.318
	B1049		29.1	55.95	5.644	22.1	4.098	0.881	3.526	0.388	2.89	0.476	1.511	0.145	1.421	0.204
	B1050		41.04	78.37	8.018	32.15	5.811	1.29	4.855	0.898	4.058	0.715	2.188	0.28	1.939	0.266
	B1051		43.04	81.79	8.652	33.45	5.995	1.382	5.182	0.605	4.192	0.661	2.097	0.218	2.018	0.285
	B1053		41.48	77.49	8.0159	32.27	5.981	1.412	4.863	0.78	3.533	0.596	1.601	0.214	1.705	0.25
	B1054		27.3	50.88	5.3	20.4	3.489	0.799	2.906	0.198	2.37	0.408	1.179	0.073	1.067	0.153
	TY37	sandstone	48.8	86.7	11.1	40.6	7.29	1.68	6.41	0.99	5.78	1.15	3.36	0.47	3.34	0.48	Yan, Z., Wang, Z., Yan, Q., Wang, T., Guo, X., 2012. Geochemical Constraints On the Provenance and Depositional Setting of the Devonian Liuling Group, East Qinling Mountains, Central China: Implications for the Tectonic Evolution of the Qinling Orogenic Belt. Journal of Sedimentary Research 82, 9-20.
	TY39	silty sandstone	14	27.6	3.46	14.3	2.9	0.63	2.83	0.49	2.93	0.59	1.64	0.24	1.55	0.22
	TY41	silty sandstone	22.8	41.6	5.05	20.4	3.77	0.93	3.59	0.58	3.5	0.69	2.06	0.3	2.08	0.33
	TY47	sandstone	28.6	53	6.93	26.6	4.96	1.04	4.48	0.75	4.49	0.87	2.58	0.37	2.52	0.37
	TY49	sandstone	45.9	90.1	10.1	37.7	6.52	1.59	5.9	0.97	5.75	1.14	3.45	0.49	3.38	0.46
	*Q10	silty sandstone	25.5	52.4	5.1	20.6	3.34	0.82	3.99	0.66	3.52	0.67	2.07	0.3	2.18	0.38
	*Q106	sandstone	32.6	63	7.48	27.3	4.92	1.17	5.34	0.83	5.05	0.98	2.87	0.4	2.92	0.43
	*Q120	sandstone	25.2	44.2	4.87	18	3.61	0.77	3.78	0.59	3.59	0.66	1.71	0.26	1.87	0.27
	*Q121	sandstone	25.5	53.1	6.2	26.3	5.09	1.31	4.47	0.78	3.79	0.73	2.11	0.3	2.2	0.33
	QS1	silty sandstone	37.7	66.6	8.67	32	5.44	1.31	4.98	0.79	4.55	0.91	2.78	0.39	2.68	0.38
	QS2	sandstone	45.9	83.2	10.1	38.1	6.89	1.57	6.11	0.95	5.48	1.08	3.16	0.43	3.02	0.45
	QS4	silty sandstone	43.8	79.5	9.51	34.3	6.11	1.25	5.39	0.86	4.85	0.95	2.8	0.41	2.73	0.4
	QS5	silty sandstone	51.9	92.6	11.1	41.4	6.82	1.47	5.97	0.88	4.7	0.93	2.74	0.4	2.75	0.4
	QS6	silty sandstone	50.8	91.2	11.2	40.7	7.01	1.56	6.32	0.92	5.09	1	2.97	0.41	2.87	0.41
	QS7	silty sandstone	46.2	82.3	9.66	36.8	6.45	1.47	6.05	0.98	5.83	1.15	3.43	0.48	3.3	0.48
	QS9	silty sandstone	50.4	90.1	11.2	40.8	7.1	1.49	6.1	0.9	4.89	0.95	2.77	0.4	2.82	0.43
	QS11	silty sandstone	27.3	49	6.1	21.7	3.88	0.9	3.37	0.53	2.84	0.55	1.61	0.22	1.55	0.22
	ZS2	silty sandstone	43.7	81.6	9.62	35.9	6.58	1.46	6.06	0.99	5.87	1.1	3.37	0.55	3.38	0.52
	ZS3	silty sandstone	50.7	93.7	11	40.7	7.51	1.6	6.93	1.13	6.67	1.32	4.13	0.63	4.06	0.62
	ZS4	silty sandstone	50.8	92.5	10.5	40.5	7.38	1.63	6.4	1.01	6.22	1.17	3.53	0.56	3.46	0.5
	ZS5	silty sandstone	42.7	79.4	9.77	36.1	6.89	1.48	6.26	1.01	5.98	1.17	3.4	0.527	3.52	0.49
	QC1	sandstone	38.1	68	7.99	30.4	5.5	1.12	5.33	0.83	5.03	0.95	2.86	0.48	3.08	0.45
	QC2	sandstone	44	76.2	9.08	32.1	6.47	1.22	6.07	0.98	5.73	1.1	3.27	0.53	3.35	0.49
	QC3	sandstone	38.9	72.9	8.61	32.6	6.14	1.46	6.04	1.04	5.98	1.18	3.45	0.52	3.45	0.49
	QC4	sandstone	42.6	76.6	8.92	33.3	6.17	1.28	6.31	0.98	5.9	1.15	3.53	0.57	3.88	0.58
	QC5	sandstone	42.3	82	9.69	34.5	6.55	1.58	6.17	1.03	6.27	1.22	3.71	0.56	3.35	0.5
	QC7	sandstone	44.8	82.9	9.28	32.5	5.9	1.57	5.97	0.93	5.39	1.03	3.19	0.47	3.15	0.51
	QC8	sandstone	37.9	65	7.63	28.6	5.18	1.23	5.25	0.84	5	0.97	2.84	0.43	2.8	0.45
	QC9	sandstone	38.5	71.8	8.25	30.6	5.57	1.51	5.28	0.86	4.91	0.95	2.87	0.47	2.88	0.42
	C10	silty sandstone	22.1	36.5	4.63	17.7	3.24	0.84	3.09	0.51	2.94	0.58	1.72	0.27	1.64	0.25
	QC11	sandstone	44.1	83.9	9.36	35.2	5.93	1.69	5.97	0.89	5.17	1.01	3.02	0.49	3.28	0.52
	QC14	sandstone	46.5	86.7	9.69	36.2	7.15	1.53	6.16	1.07	6.36	1.23	3.78	0.58	3.66	0.54
	QC15	sandstone	42.2	78.1	9.18	34.7	6.1	1.45	5.56	0.94	5.45	1.03	3.27	0.48	3.11	0.46
	QC16	sandstone	42.1	79.8	9.16	33.2	6.11	1.26	6.25	0.99	5.73	1.11	3.27	0.49	3.33	0.48
	QCl8	sandstone	46.1	82.2	8.89	31.3	5.67	1.3	5.73	0.94	5.61	1.07	3.3	0.52	3.71	0.52
	ZS55	sandstone	48.4	91.9	11	41.4	6.84	1.63	5.82	0.86	4.78	0.89	2.61	0.4	3.02	0.46
	ZS57	sandstone	46.1	86.4	10.8	40.7	7.28	1.81	6.64	1.09	6.59	1.32	3.94	0.59	4.19	0.59
	ZS59	sandstone	47.3	84.8	10.2	39.8	6.71	1.64	6.65	0.98	5.67	1.09	3.18	0.44	3.27	0.46
	ZS61	silty sandstone	36.6	64.1	8.34	30.8	5.46	1.14	5.12	0.83	4.72	0.96	2.79	0.41	2.81	0.42
	ZS62	sandstone	48.2	90	11	40.6	6.93	1.69	6.64	1.03	5.97	1.18	3.54	0.49	3.33	0.46
	ZS64	sandstone	37.8	64	8.74	32.7	6	1.22	5.42	0.86	4.99	1.03	3.07	0.44	2.89	0.42
	ZS65	sandstone	37.3	65.9	8.64	31.6	5.75	1.33	5.37	0.81	4.66	0.9	2.6	0.36	2.53	0.34
	GFl	silty sandstone	31.1	55.5	6.63	24.4	4.48	0.97	4.03	0.6	3.4	0.63	1.88	0.31	1.96	0.28
	GF2	silty sandstone	32	55.1	6.95	25.6	4.62	1.05	3.69	0.59	3.2	0.59	1.73	0.25	1.73	0.24
	GF3	sandstone	48.6	79.6	10.7	40.4	7.52	1.61	7.07	1.13	6.63	1.21	3.63	0.55	3.38	0.51
	GF4	silty sandstone	47.8	88	10.3	38.8	7.36	1.47	6.5	1	5.54	1.03	2.84	0.43	2.73	0.41
	GF5	silty sandstone	47.2	86.7	9.85	35.5	6.38	1.28	5.48	0.88	4.66	0.88	2.59	0.39	2.56	0.41
	GF6	sandstone	38.3	73.5	8.54	31	5.82	1.27	5.23	0.89	5.08	0.94	2.98	0.46	2.87	0.44
	GF7	sandstone	38.3	70	8.31	30.9	5.69	1.39	5.56	0.86	5.26	0.93	2.91	0.46	2.99	0.44
	GF10	sandstone	32.7	51.8	7.21	27.3	5.34	1.18	4.93	0.76	4.26	0.73	2.18	0.33	1.96	0.3
	GF11	silty sandstone	52.5	98.4	10.7	36.9	6.16	1.21	5.48	0.78	3.84	0.66	1.68	0.21	1.4	0.2
	GF13	silty sandstone	37.8	70.6	8.18	28.5	5.11	1.2	4.84	0.78	4.21	0.79	2.41	0.38	2.36	0.38
	GF16	sandstone	43.1	81.9	9.58	35.8	6.76	1.46	6.21	1.01	6.19	1.16	3.53	0.52	3.16	0.5
	GF17	sandstone	37.6	69.8	8.46	31.9	6.25	1.32	6.52	1.03	6.12	1.24	3.77	0.57	3.57	0.51
	GF18	sandstone	40.4	74.1	8.92	33.4	6.21	1.32	6.3	1.02	5.82	1.07	3.28	0.52	3.36	0.49
	GF22	sandstone	39.1	70.3	8.08	29.4	5.04	1.17	5.35	0.83	4.83	0.92	2.78	0.45	2.92	0.41
	GF24	silty sandstone	34.3	65.7	7.99	29.8	5.79	1.34	5.62	1	6.61	1.31	4.28	0.67	4.11	0.62
	NR66	sandstone	44.9	82.1	10.1	36.6	6.78	1.44	6.24	0.94	5.6	1.09	3.33	0.48	3.25	0.46
	*Q272	silty sandstone	27.1	47.8	5.59	21.4	3.31	0.87	3.43	0.56	3.05	0.61	1.8	0.25	1.84	0.27
	*0274	silty sandstone	21.1	36.3	4.63	16.6	2.68	0.69	2.64	0.3	2.35	0.42	1.36	0.19	1.43	0.21
	*0275	silty sandstone	18	33	3.96	15.4	2.68	0.71	2.83	0.37	2.69	0.55	1.54	0.23	1.59	0.23
	*Q314	silty sandstone	32.5	60.6	6.56	27.2	4.24	1.06	4.57	0.55	3.32	0.62	1.94	0.2	1.9	0.28
	SL-114		16.8	32.9	3.81	13.6	2.51	0.49	1.89	0.32	1.83	0.38	1.1	0.16	1.01	0.16	Shi, G., Wang, H., Huang, C., Yang, S., Song, G., 2016. Provenance and tectonic setting of middle-upper Devonian sandstones in the Qinling Orogen (Shanyang area): New insights from geochemistry, heavy minerals and tourmaline chemistry. Tectonophysics 688, 11-25.
	SL-120		25.7	52.3	6.06	23.8	4.37	0.83	3.54	0.57	3.28	0.67	1.82	0.27	2	0.28
	SL-121		29.9	61.7	6.95	26.9	5.26	0.99	5.49	0.89	5.52	1.19	3.24	0.5	3.08	0.53
	SL-122		24.2	50.1	5.78	21.6	4.19	0.83	3.51	0.6	3.5	0.75	1.94	0.33	2.01	0.31
	SL-124		19.5	41.4	4.93	19.3	3.88	0.74	3.17	0.53	3.59	0.72	2.01	0.31	2.09	0.28
	SL-127		34.8	70.3	7.76	31	5.91	1.21	5.19	0.8	4.88	0.92	2.44	0.4	2.55	0.36
	SL-131		31.3	62.6	7.11	27.1	5.46	1	4.71	0.77	4.7	0.92	2.65	0.39	2.53	0.4
	SL-133		36.7	69.4	8.04	29.5	5.29	1.53	4.46	0.72	4.39	0.91	2.53	0.35	2.42	0.31
	SL-134		22.7	45.8	5.45	20.8	4.44	0.84	4.08	0.77	4.09	0.89	2.24	0.34	2.18	0.34
	SL-137		55.3	109	12.15	46.5	8.61	1.44	6.22	0.88	4.23	0.86	2.44	0.33	2.17	0.35
	SL-141		31.2	62	7.22	27	4.92	0.95	4.11	0.59	3.8	0.8	2.05	0.34	1.98	0.32
	SL-142		22.1	48.9	5.31	21.8	4.47	0.67	3.85	0.63	3.42	0.76	1.96	0.3	1.83	0.29
	SL-143		28.2	55.2	6.23	24.7	4.82	0.99	4.39	0.77	4.09	0.9	2.23	0.36	2.26	0.3
	0523/1	siltstone	22.5	37.5	4.66	17.4	2.99	1.07	3.08	0.46	2.32	0.46	1.22	0.25	1.06	0.22	tested by the method of ICP-MS in this study
	0523/2	siltstone	31.9	57.9	7.43	27.8	5.38	1.45	4.86	0.76	4.35	0.85	2.26	0.46	2.25	0.42
	0523/3	siltstone	27.4	52.5	6.01	22.8	4.46	1.1	4.17	0.59	3.16	0.64	1.76	0.34	1.72	0.34
	0523/4	siltstone	31.9	57	7.51	26.8	5.4	1.66	5	0.8	4.44	0.94	2.44	0.52	2.36	0.48
	0523/5	siltstone	37.6	64	7.95	29	5.42	1.61	4.84	0.72	4.16	0.88	2.34	0.49	2.5	0.51
	0523/6	siltstone	31.6	55.8	6.71	24.2	3.89	1.1	4.05	0.57	3.08	0.6	1.62	0.31	1.6	0.3
	0523/7	siltstone	26.8	53	5.87	21.4	3.31	0.91	3.23	0.45	2.29	0.48	1.32	0.24	1.26	0.23
	0523/8	siltstone	41.6	79.8	9.27	32.6	6.23	1.55	5.2	0.78	4.54	0.91	2.52	0.53	2.44	0.5
	0523/9	siltstone	43	72.9	8.91	31.9	5.66	1.32	4.91	0.74	4.03	0.85	2.24	0.4	2.02	0.42
	0523/10	siltstone	29.3	54.5	6.18	22.4	3.76	1.1	3.64	0.5	2.84	0.58	1.56	0.29	1.52	0.3
	0523/11	siltstone	32.8	60.5	7.49	26.8	5.23	1.16	4.44	0.66	4.12	0.83	2.23	0.44	2.09	0.46
	0523/12	siltstone	31.5	62.6	6.7	24	4.31	1.49	3.78	0.54	2.78	0.59	1.77	0.37	1.96	0.41
	0523/13	siltstone	50.6	85.5	10.4	39	7.34	1.99	6	0.9	5.44	1.14	2.96	0.6	2.76	0.56
	0523/14	siltstone	42	80.2	9.3	33	6.1	1.69	5.17	0.74	4.51	0.92	2.45	0.51	2.62	0.54
	0523/15	siltstone	50.2	84.7	9.74	34.4	6.17	2	5.65	0.85	4.72	0.96	2.59	0.53	2.7	0.5
	0523/16	siltstone	56.2	104	11.8	41.8	7.13	1.63	6.36	0.9	5.01	0.99	2.7	0.5	2.47	0.48
	0523/17	siltstone	30.1	56.4	6.54	22.6	4.1	1.08	3.53	0.53	2.98	0.6	1.7	0.32	1.54	0.31
